# Supplementary material
Source: PubMed Central journal article supplement (PMC3495600)

**Palladium-Catalyzed Diastereo- and Enantioselective Formal [3+2]-  
Cycloadditions of Substituted Vinylcyclopropanes**

NMR SPECTRA OF NOVEL COMPOUNDS

Barry M. Trost\*, Patrick J. Morris, and Simon J. Sprague

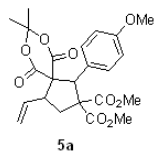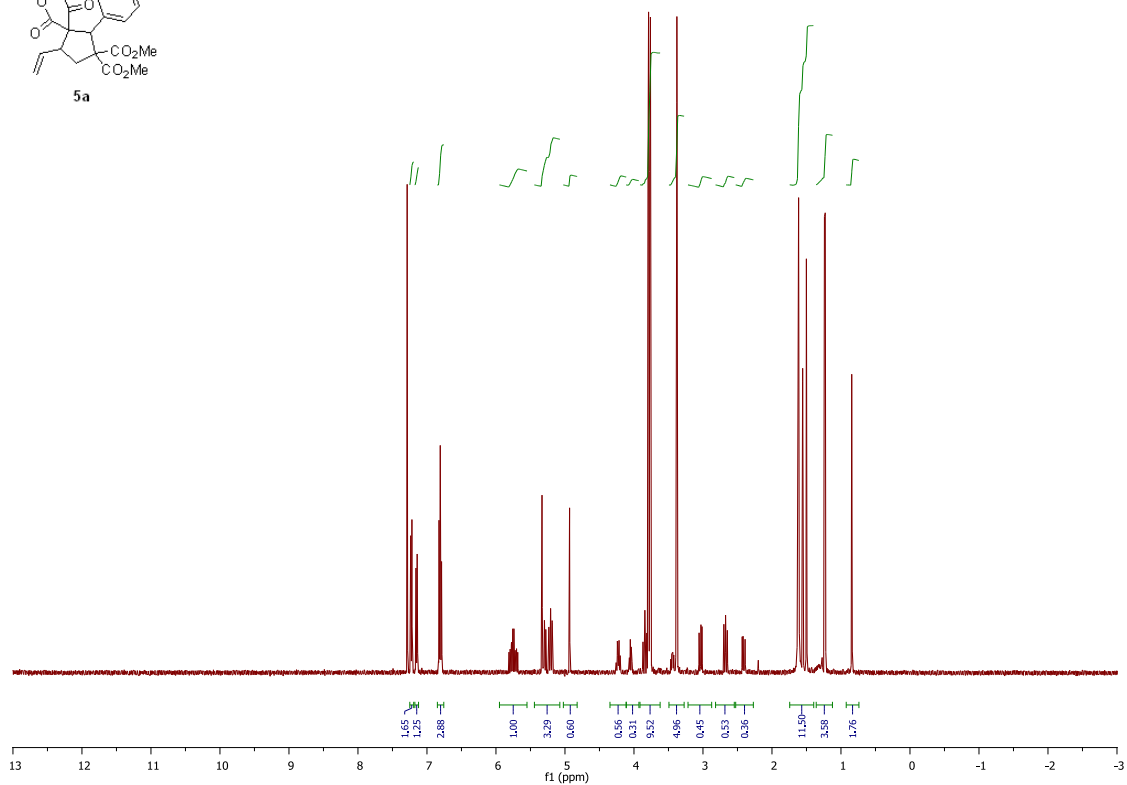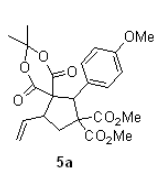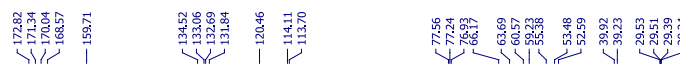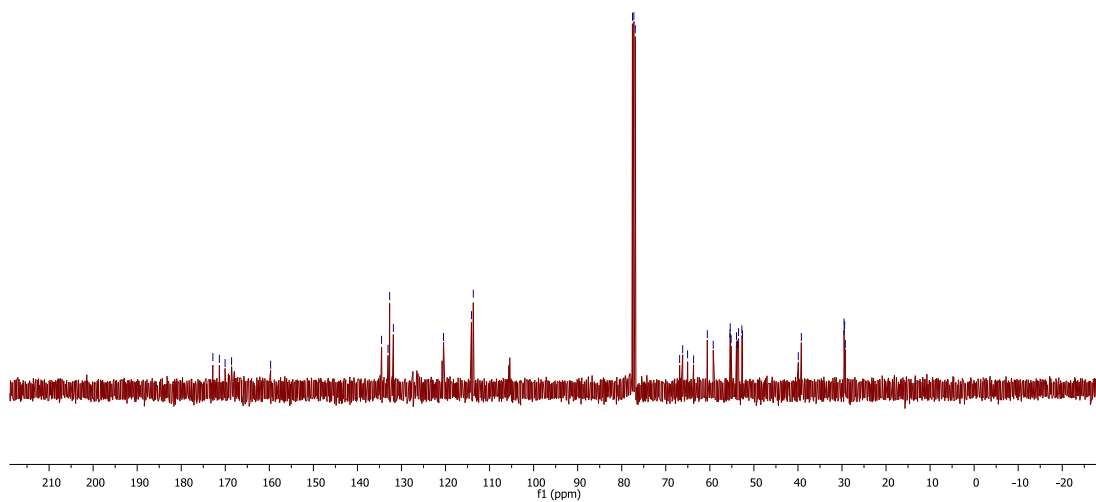

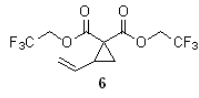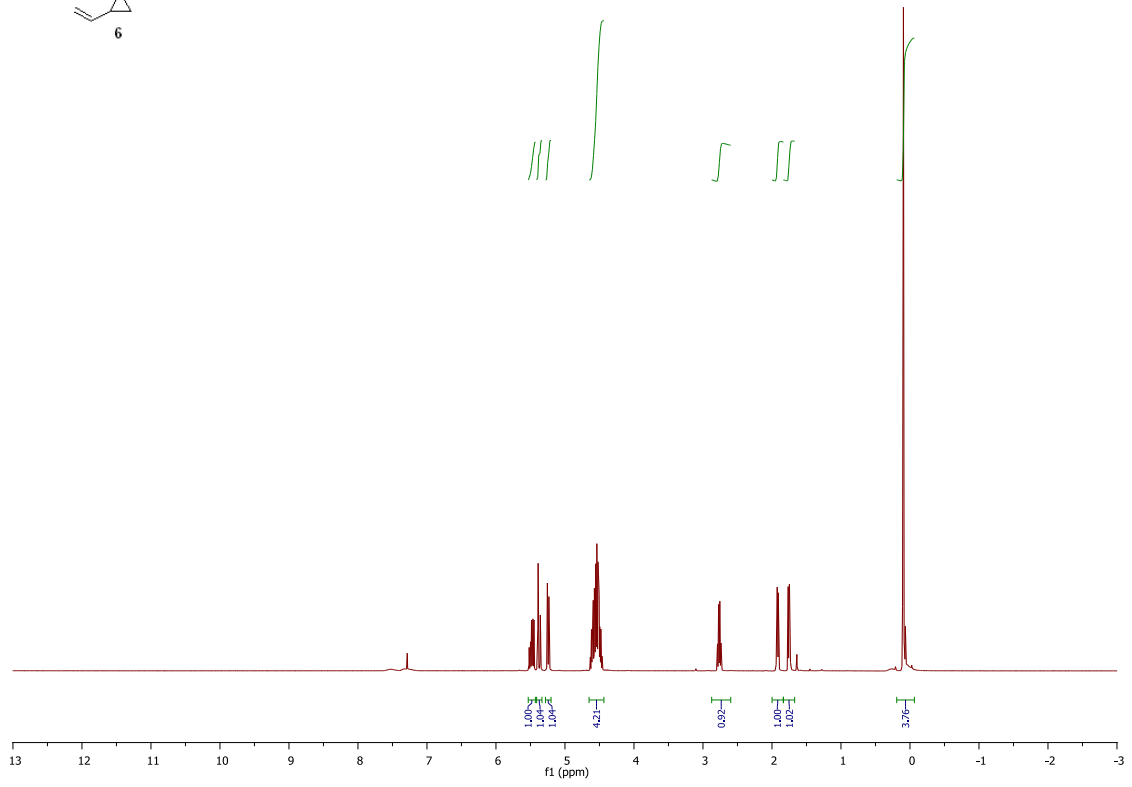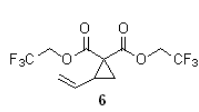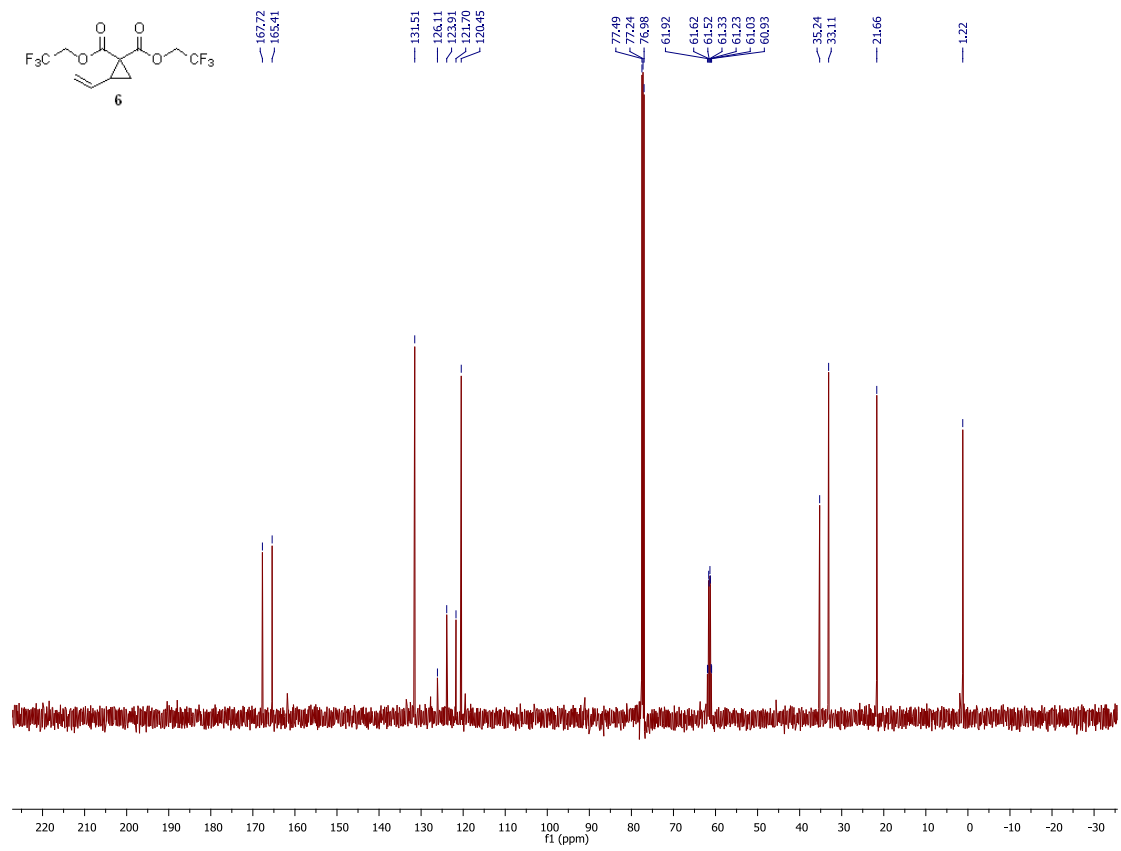

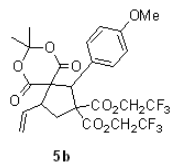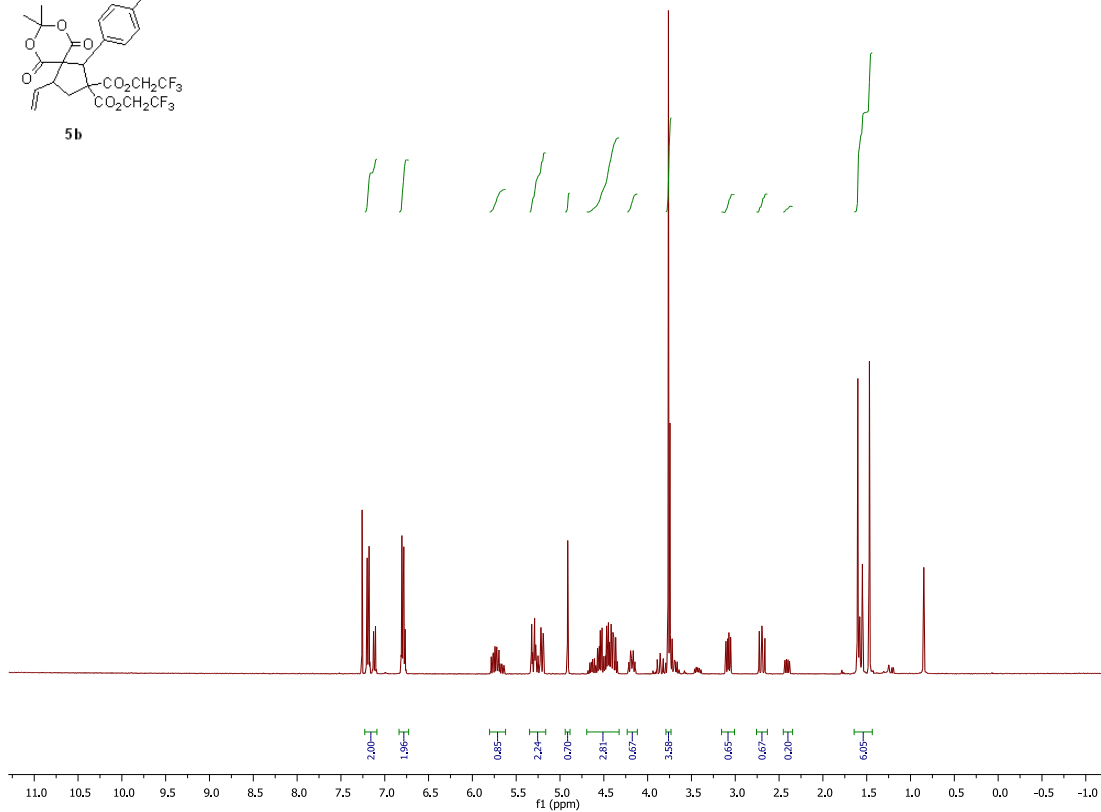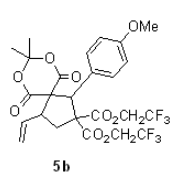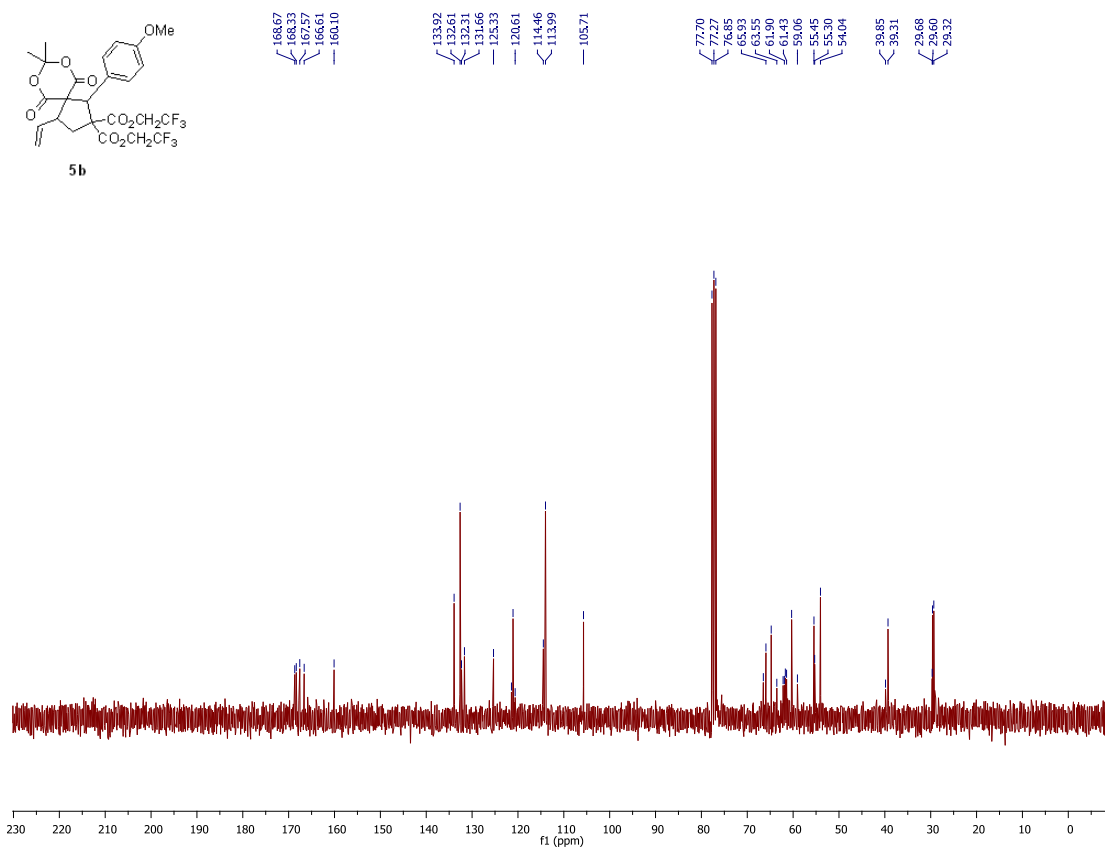

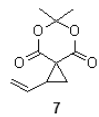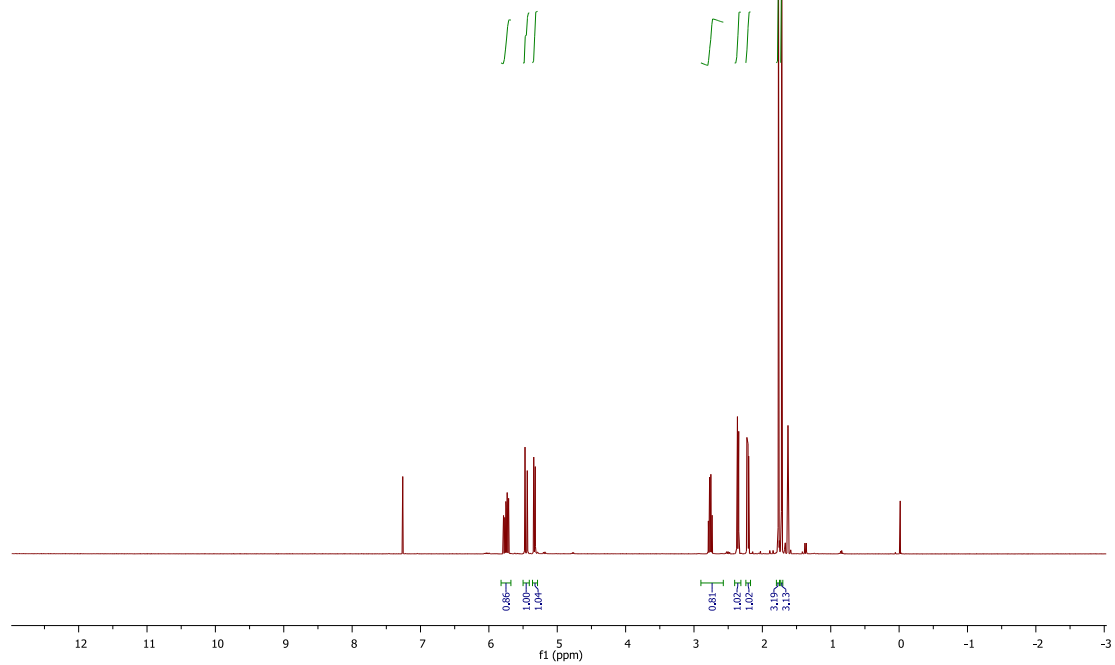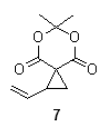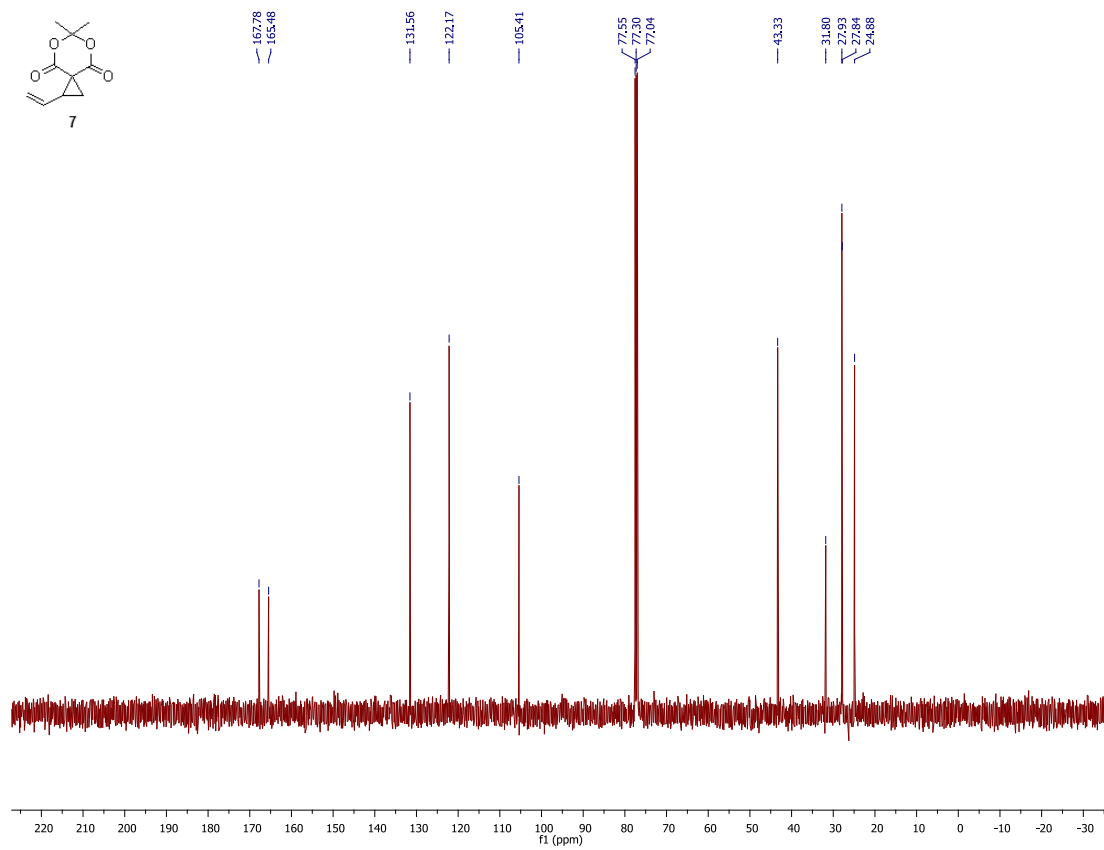

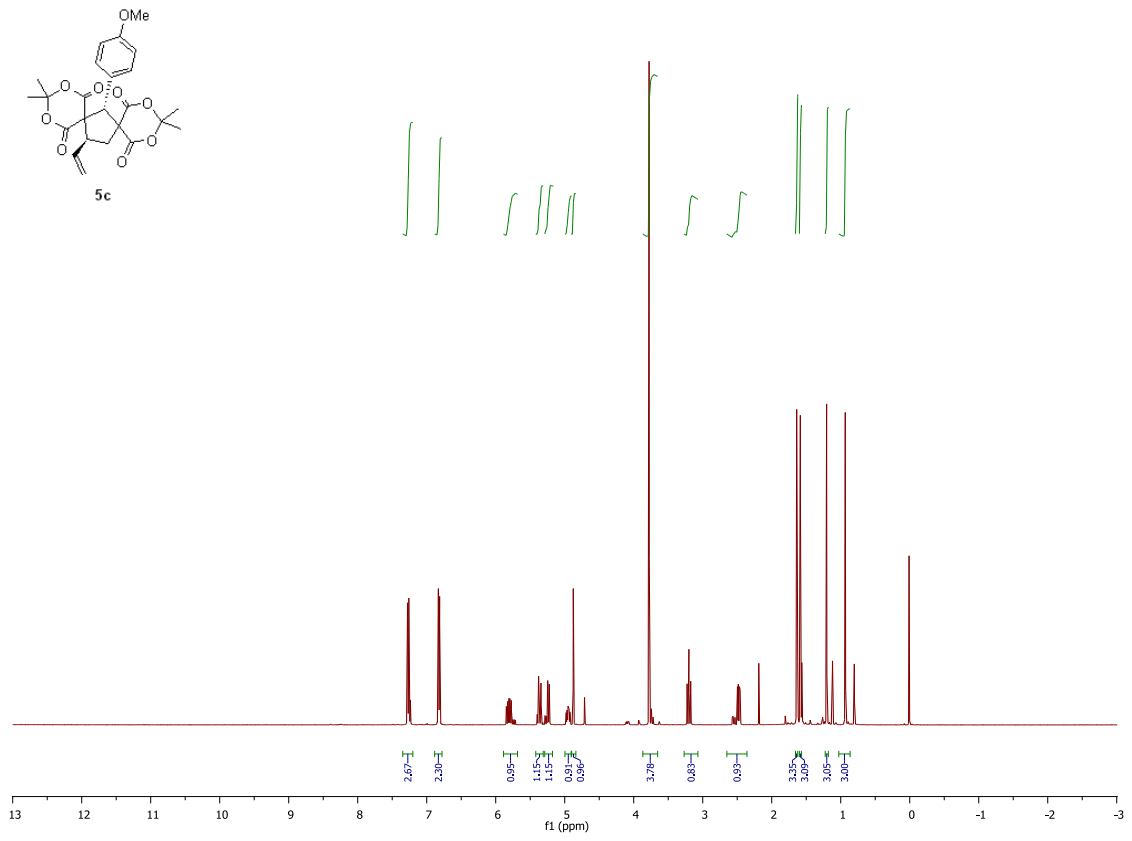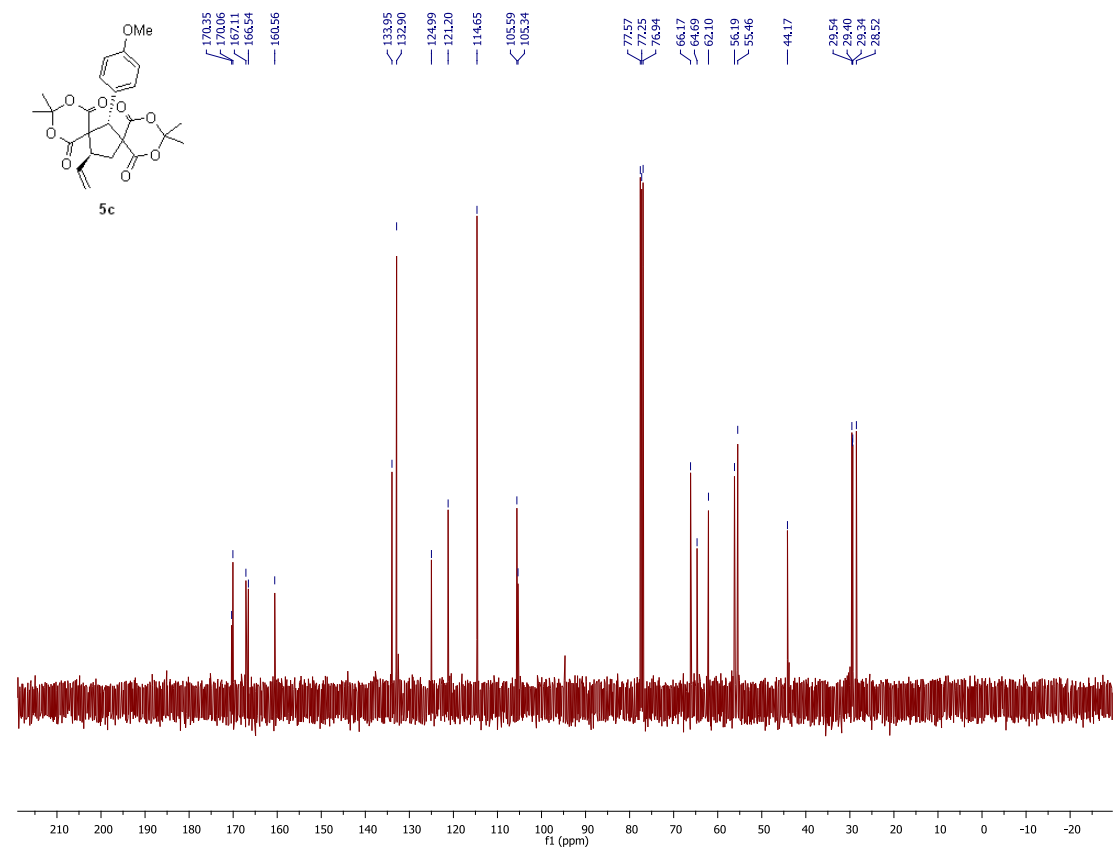

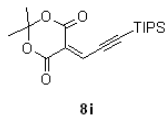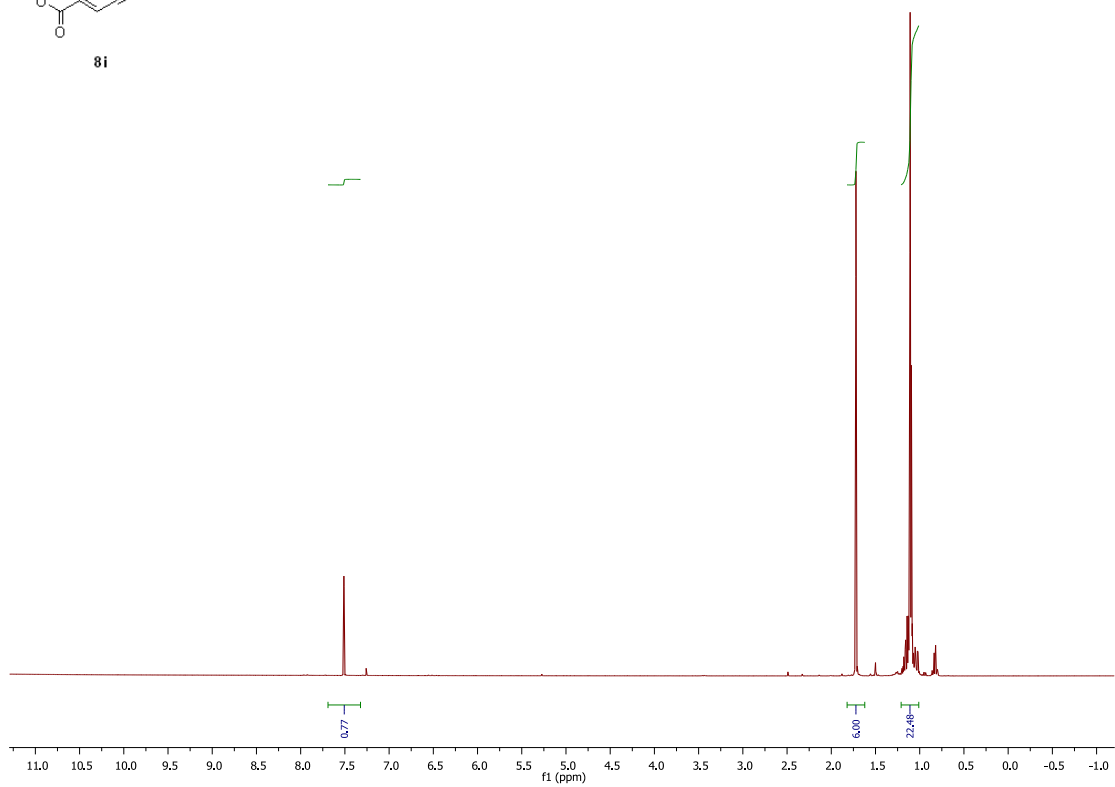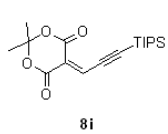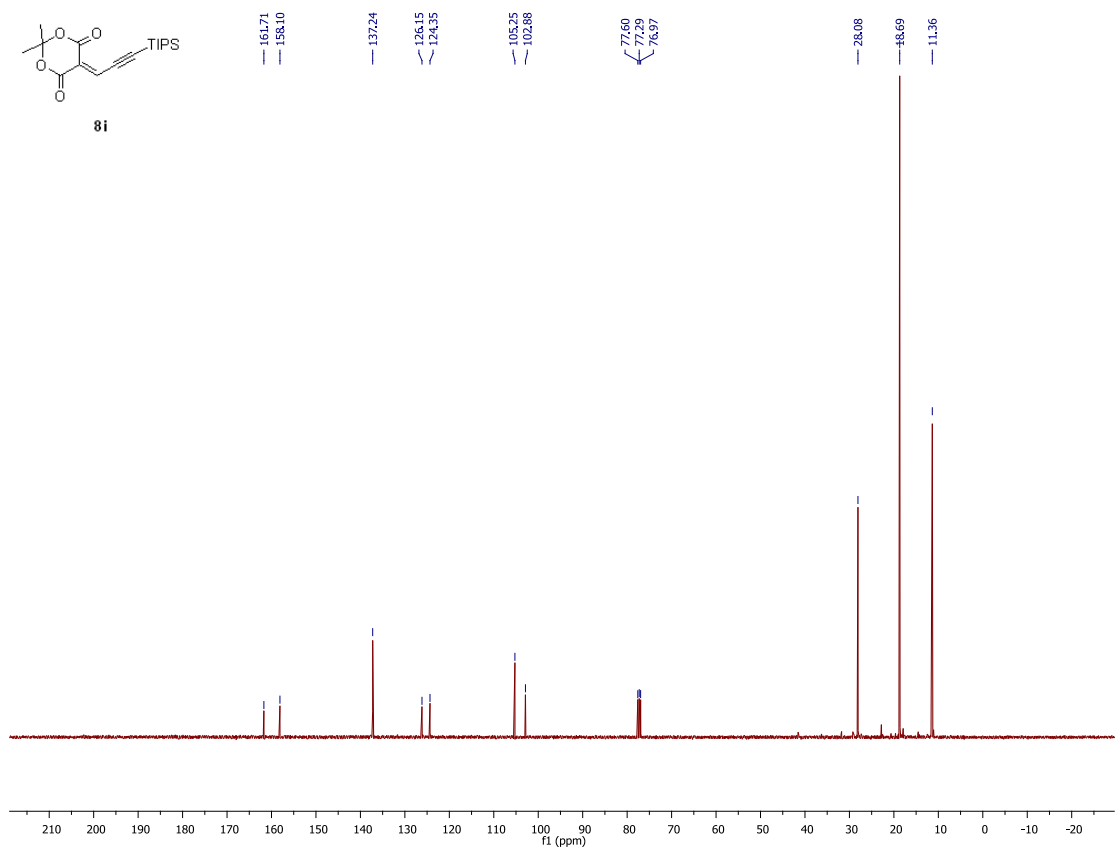

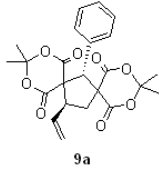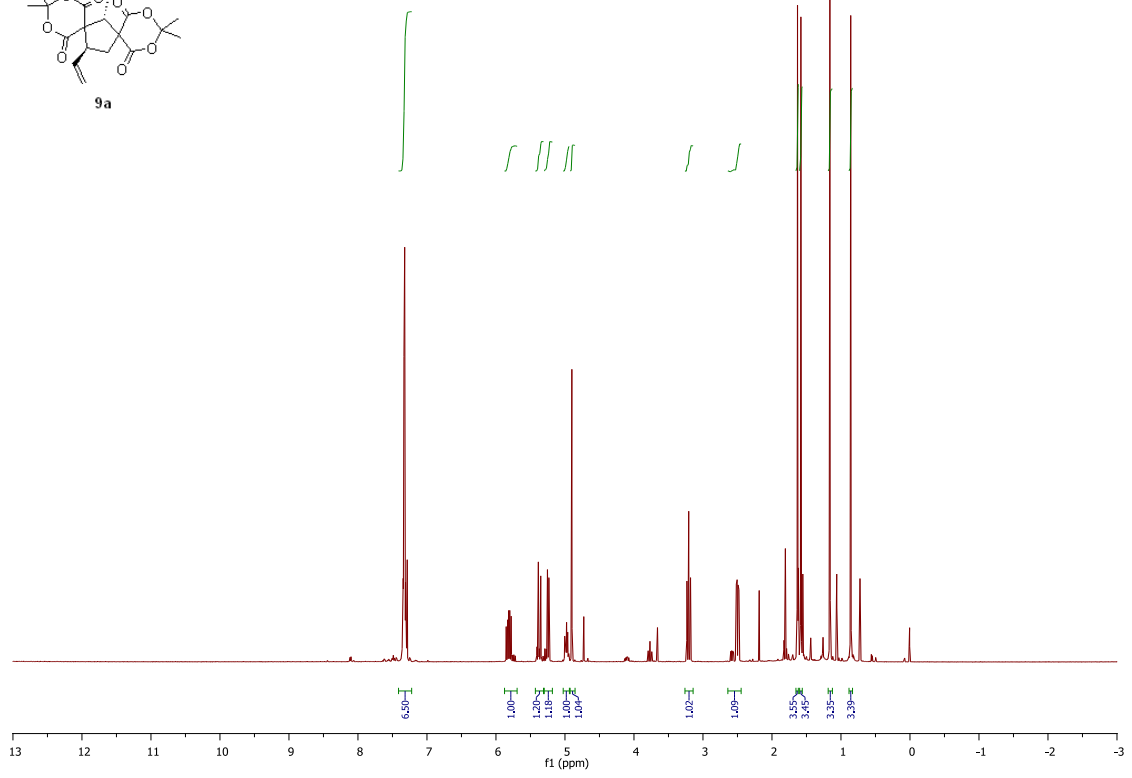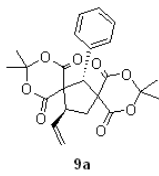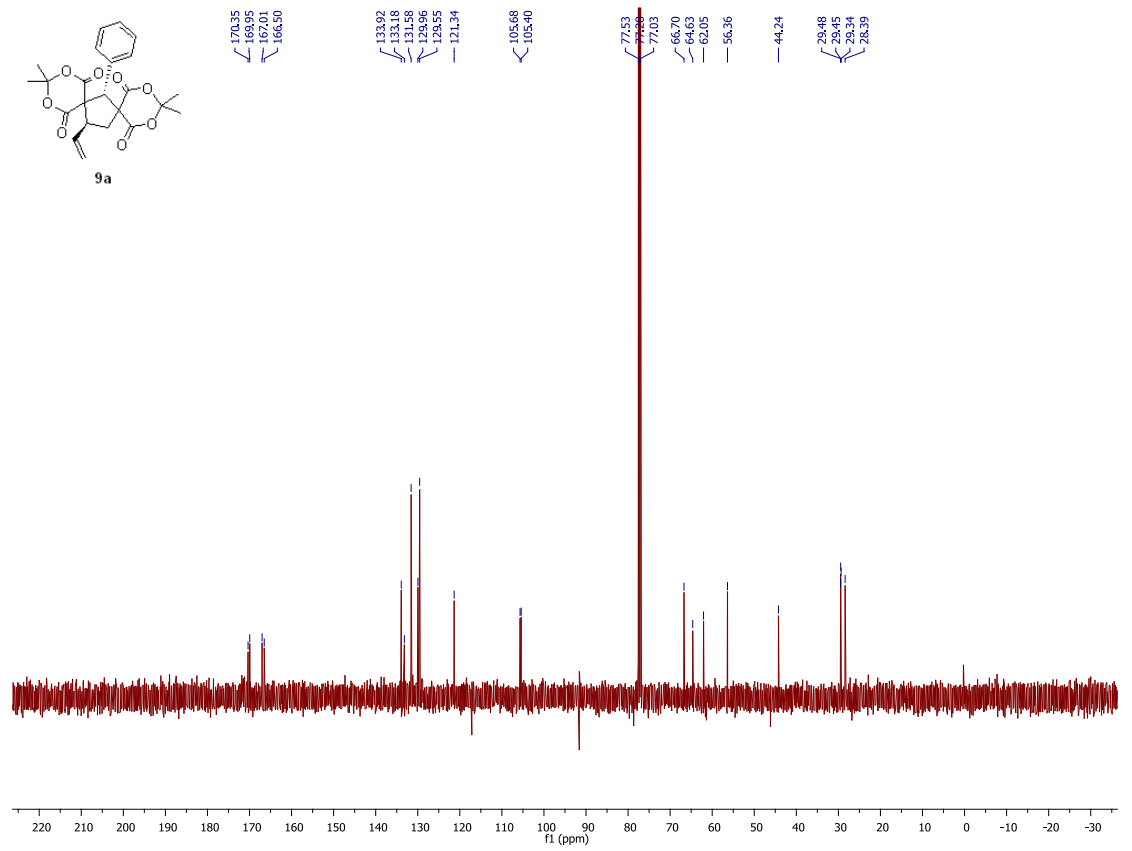



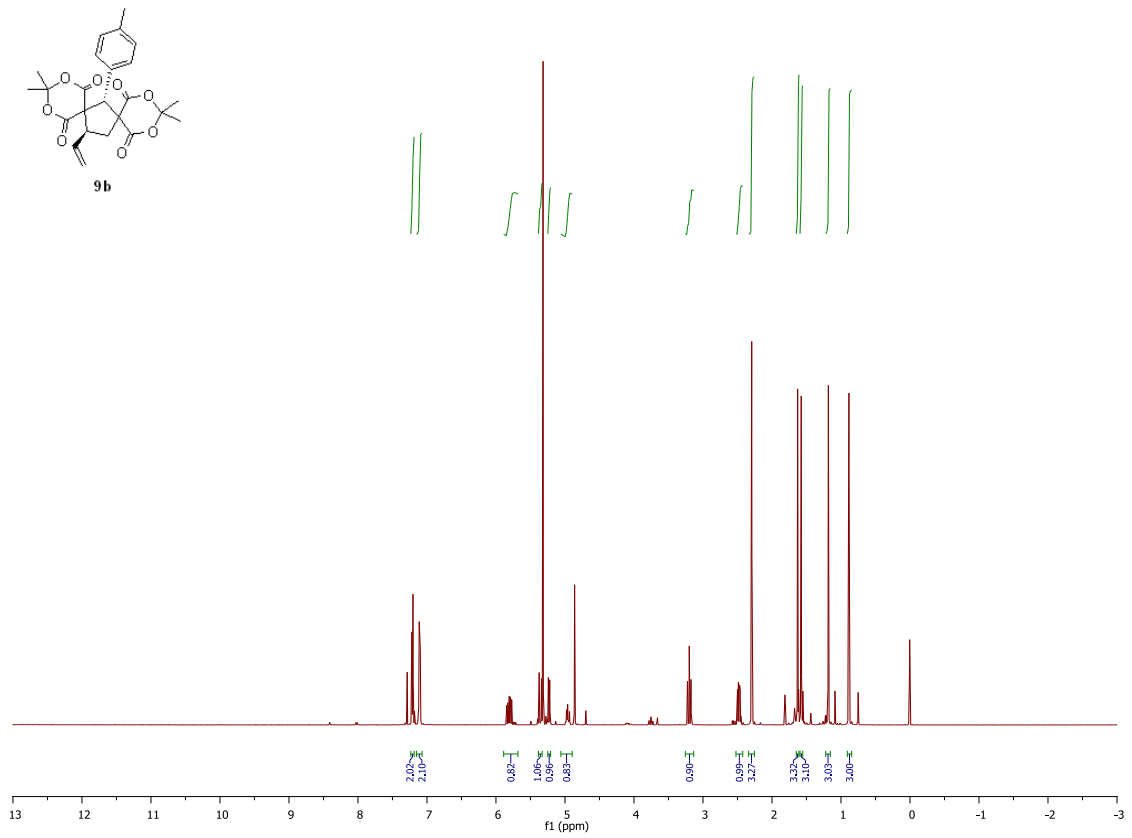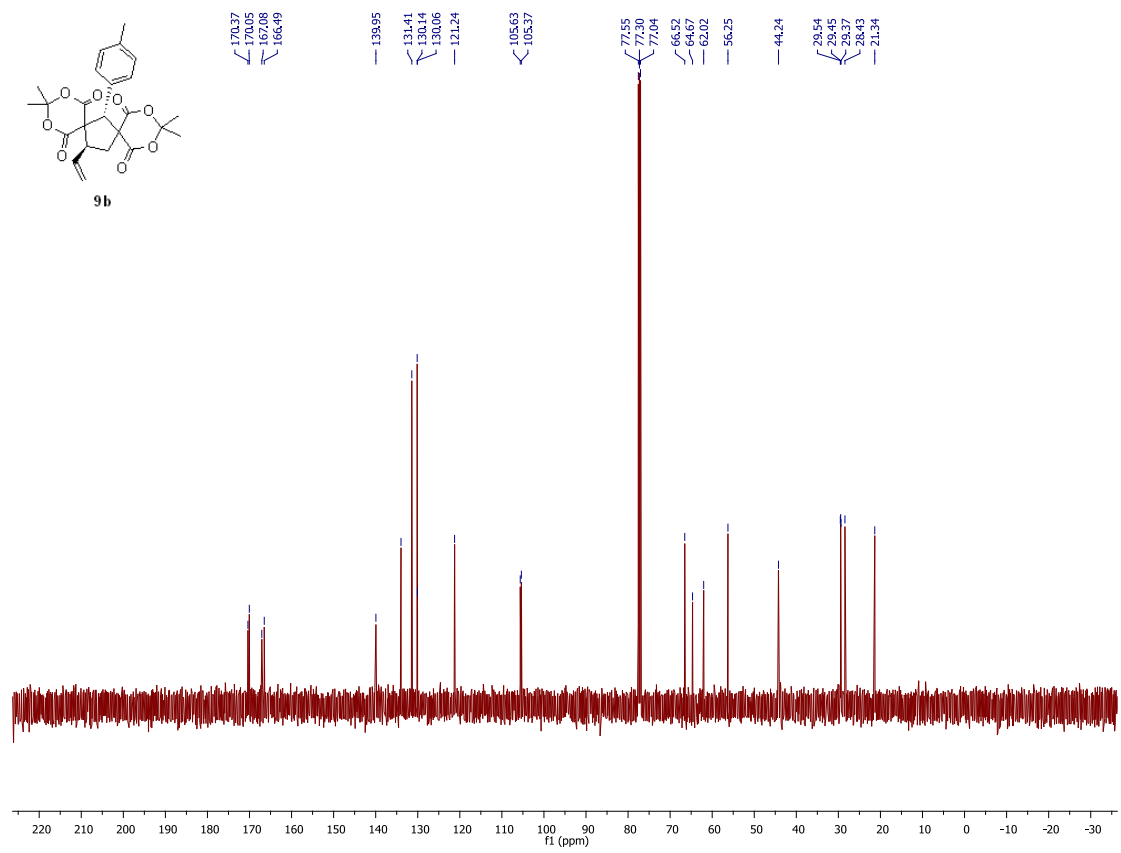

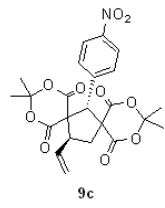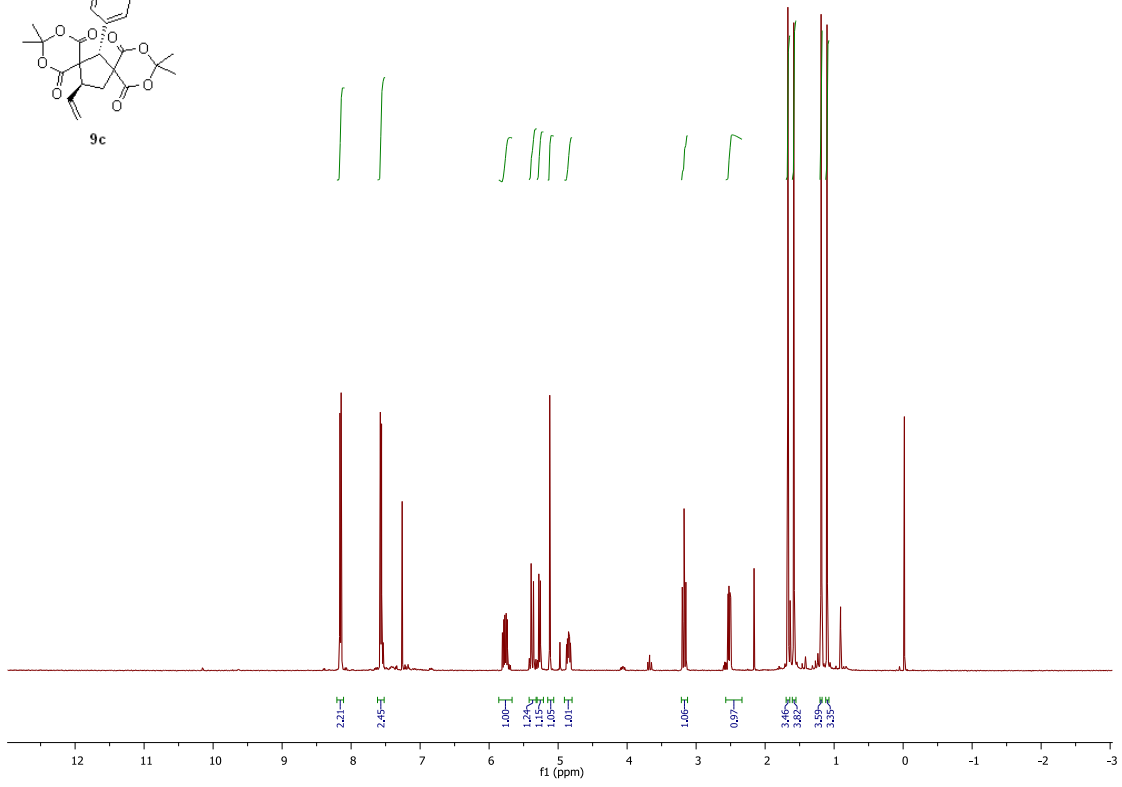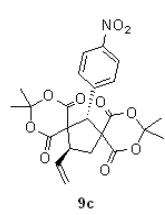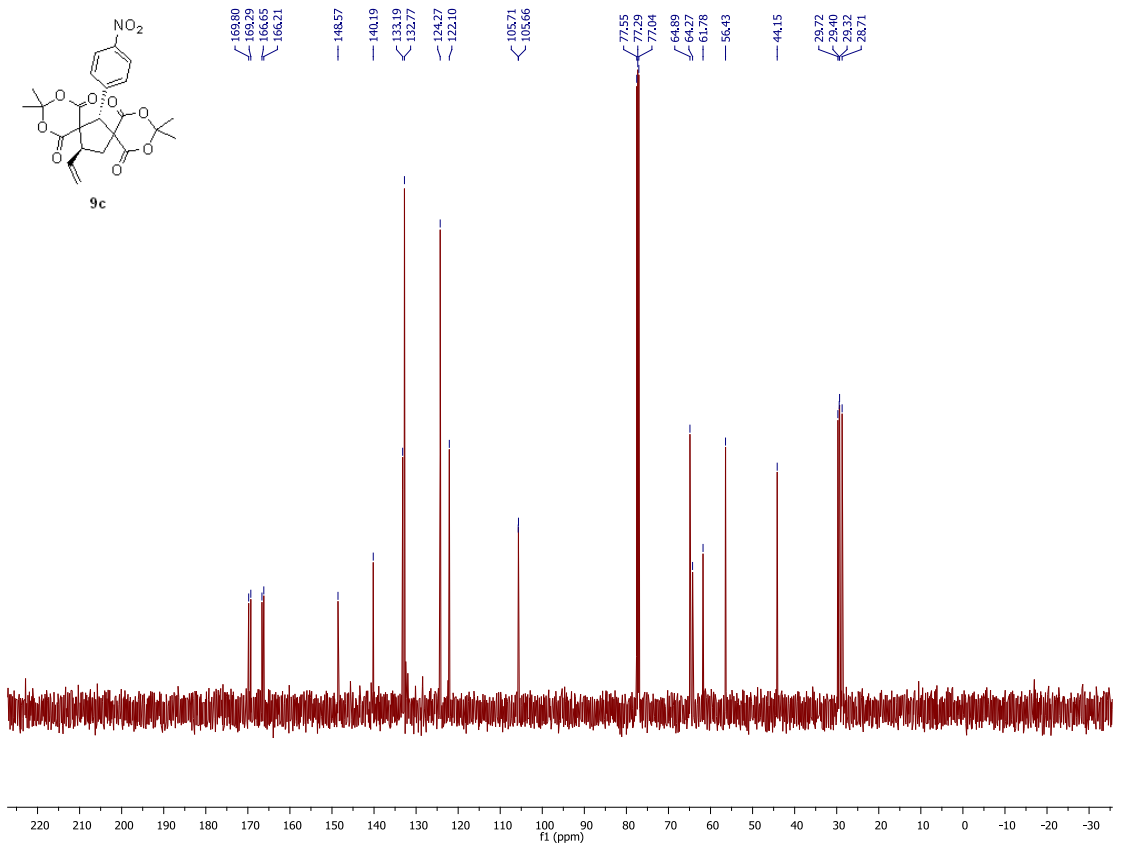

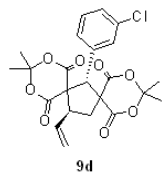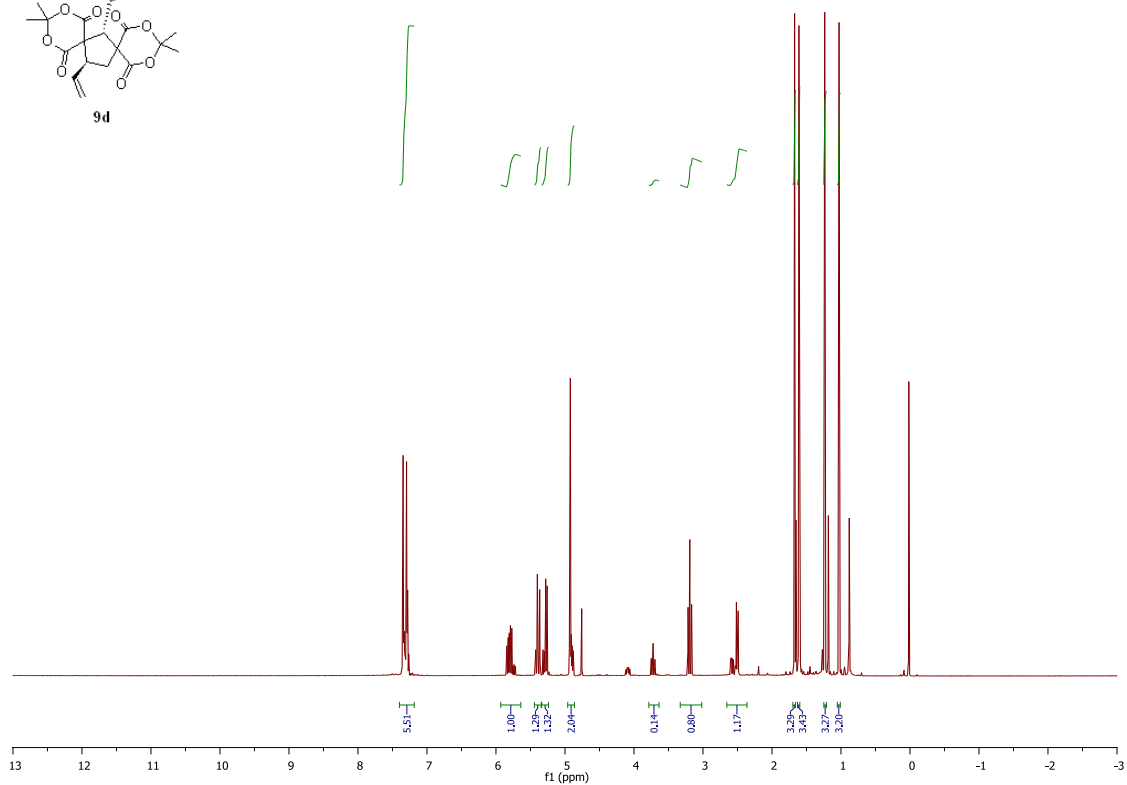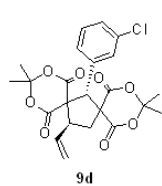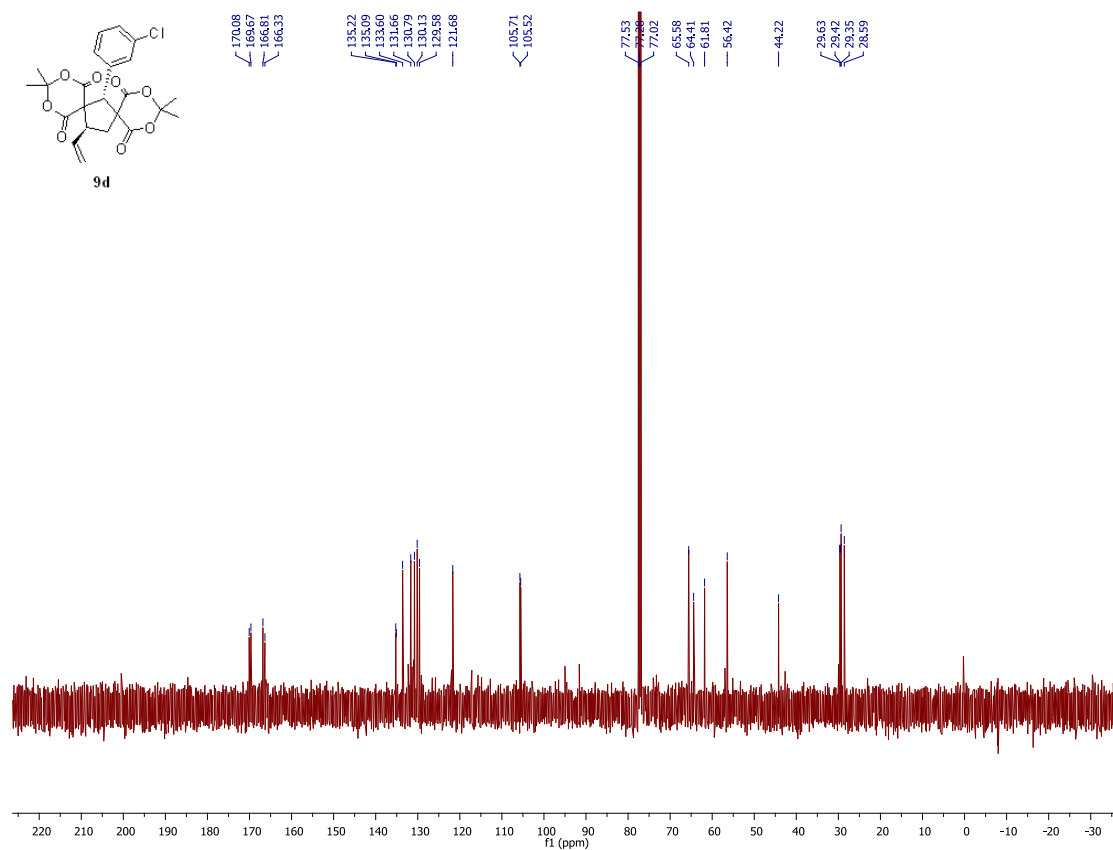

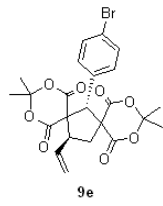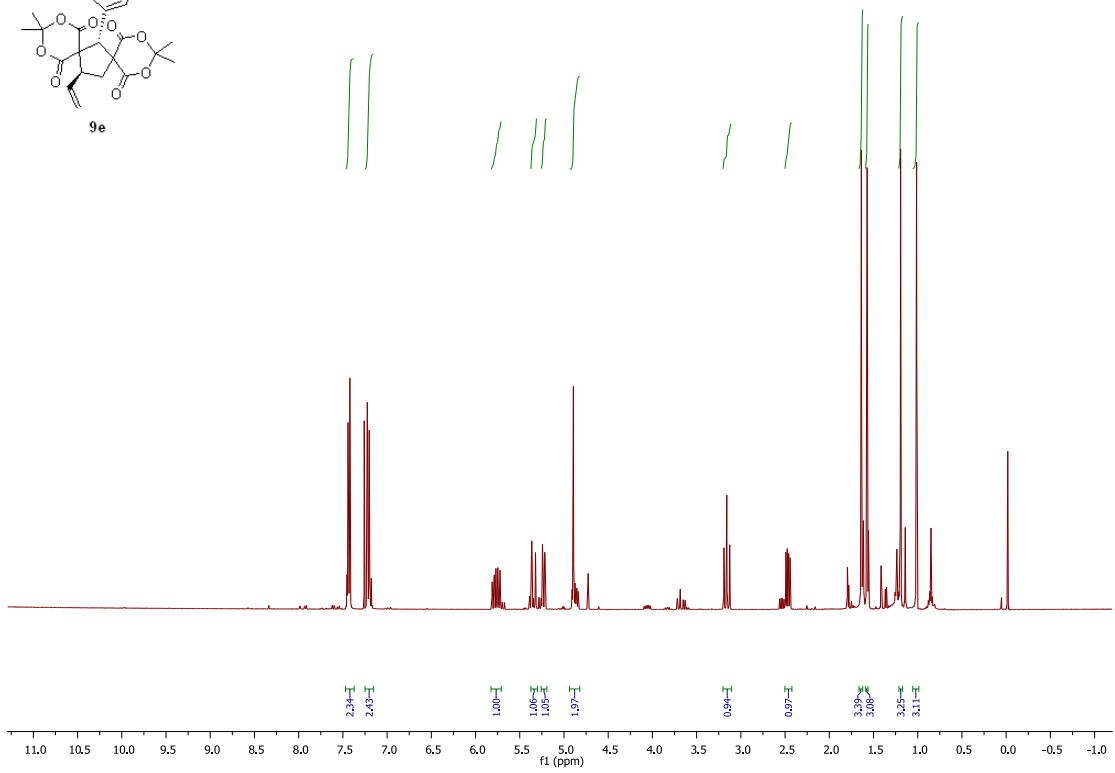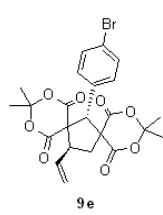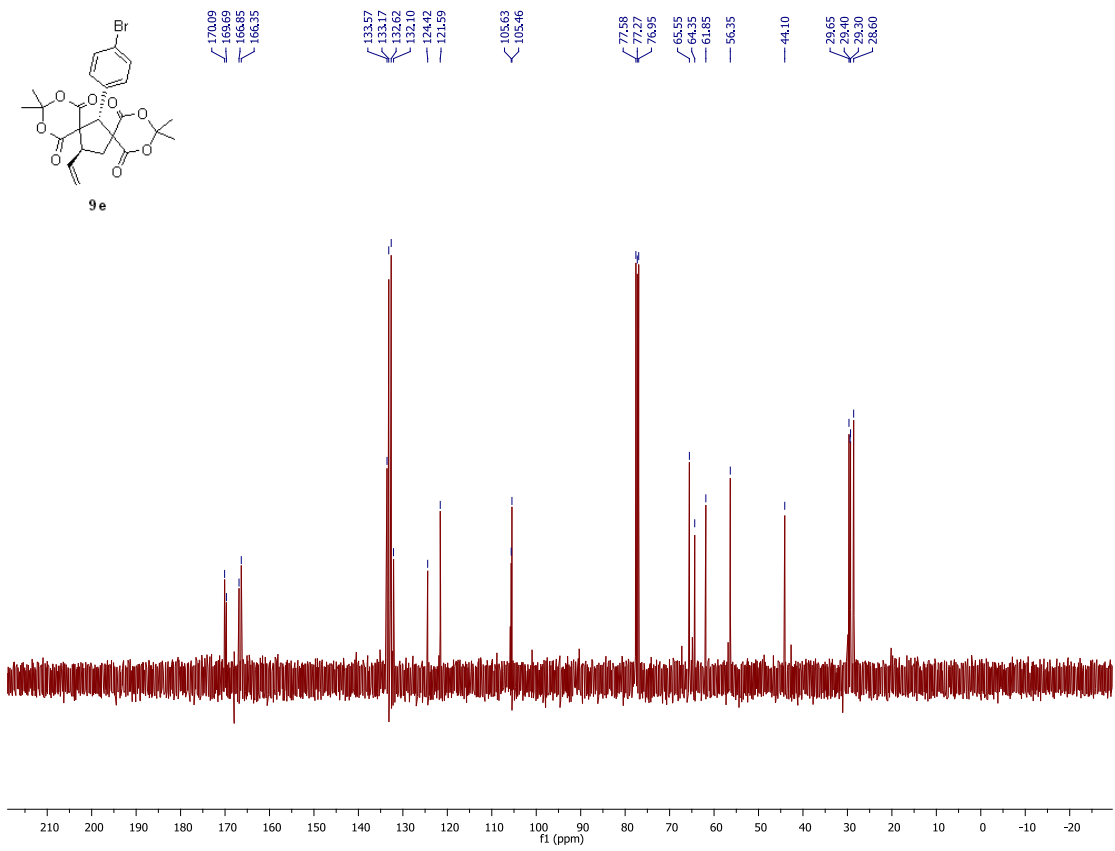

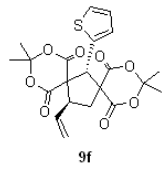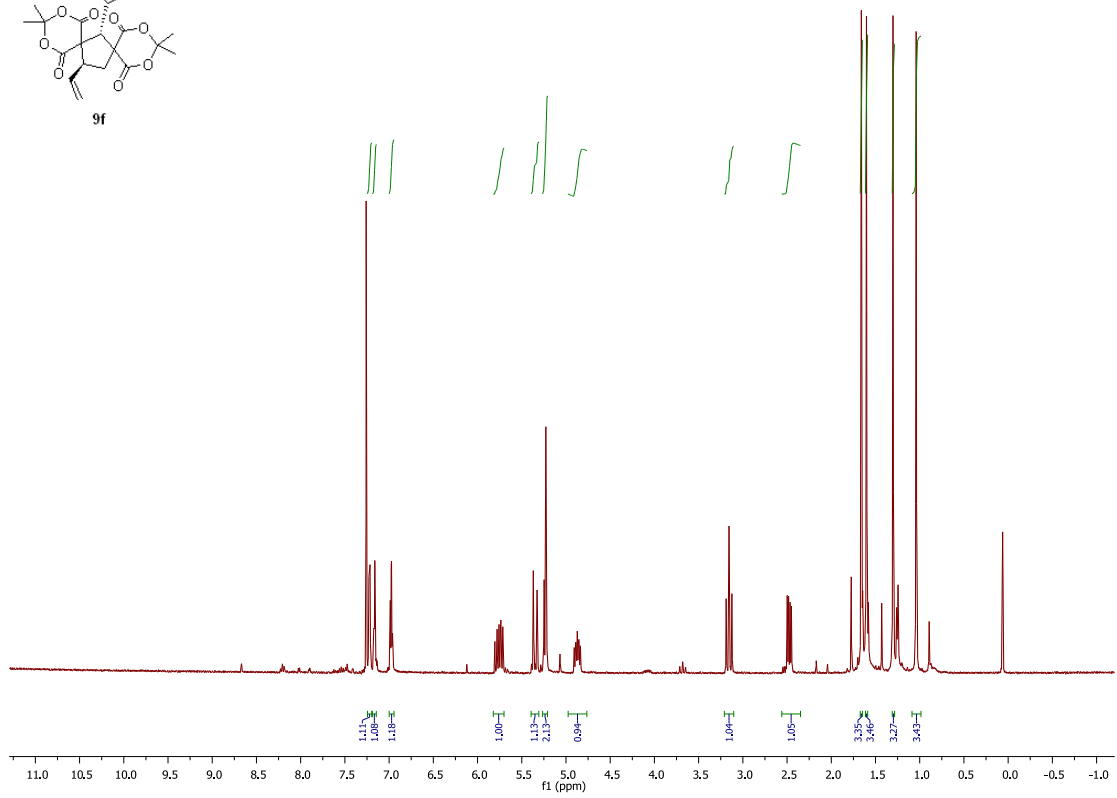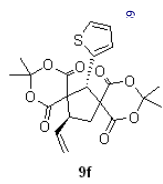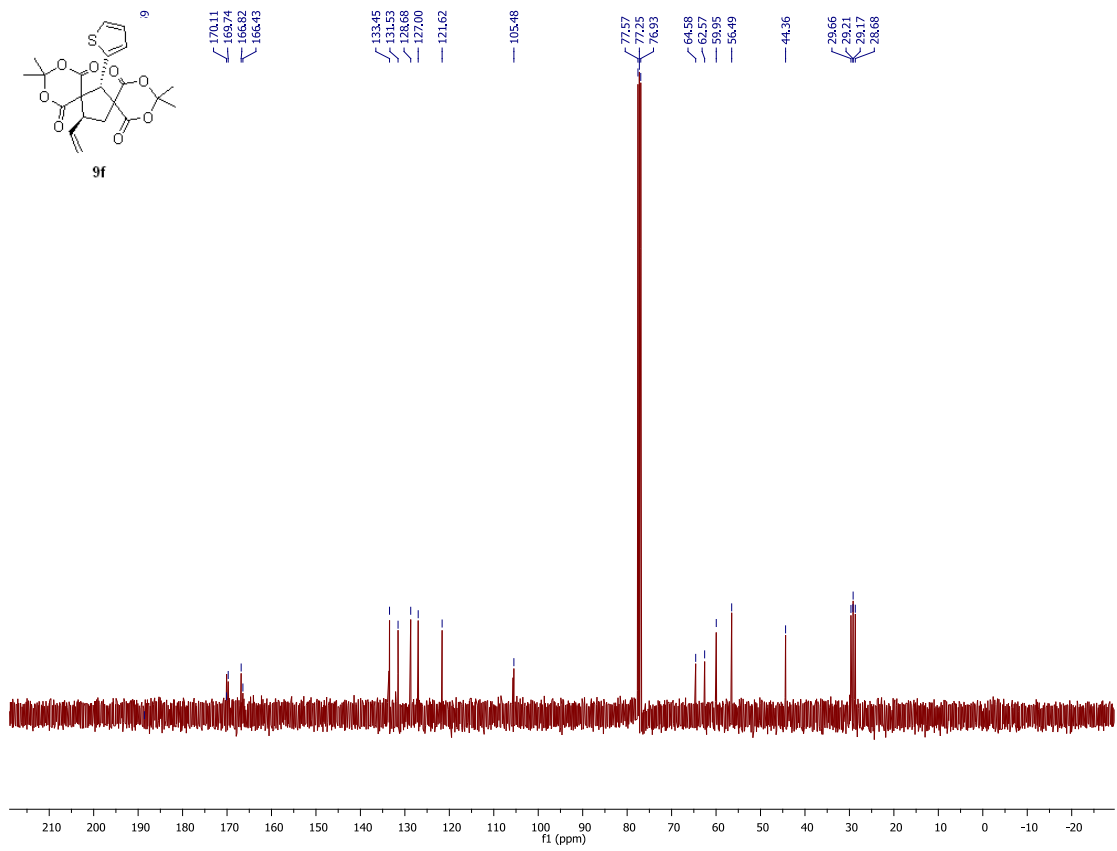

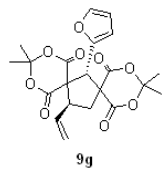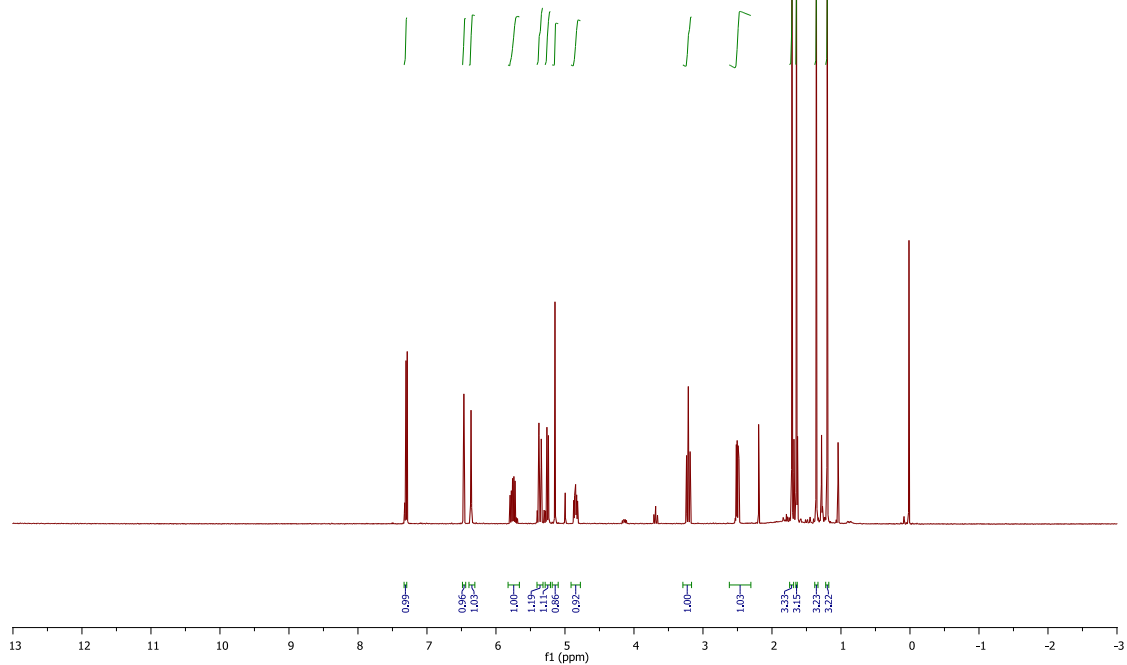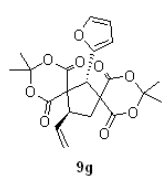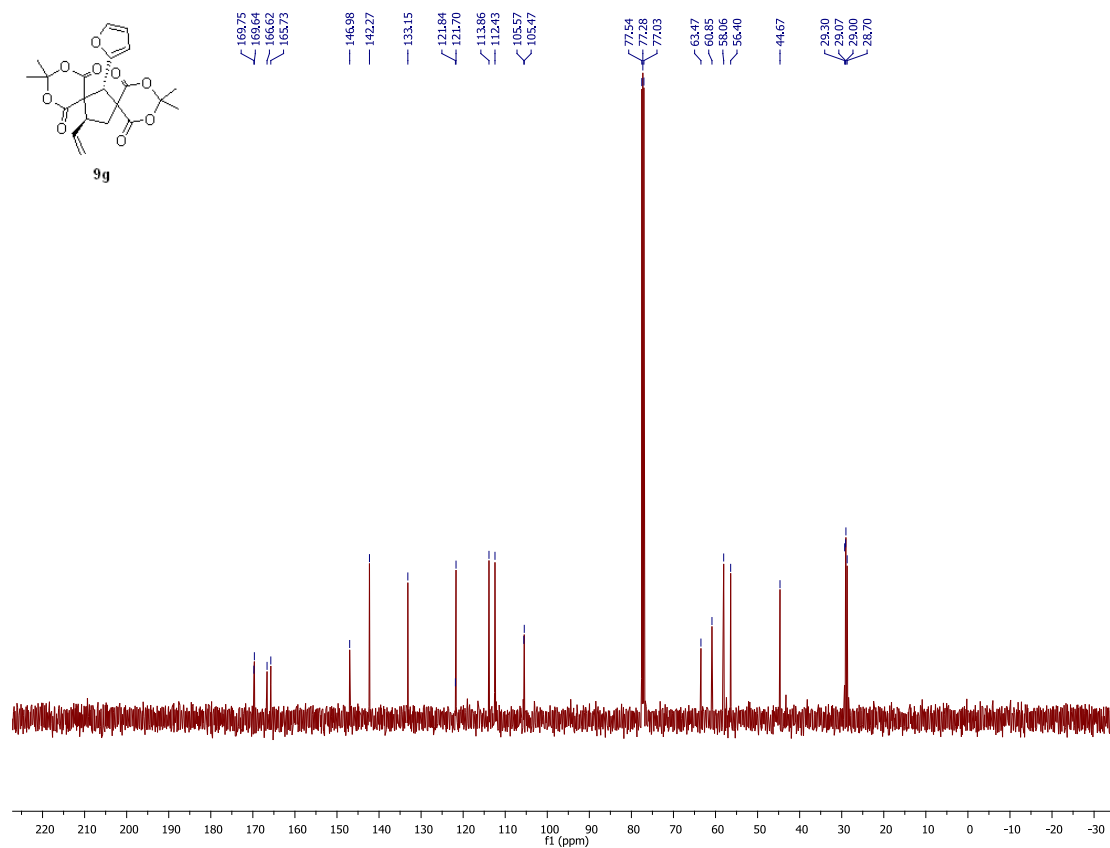

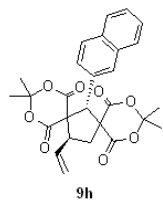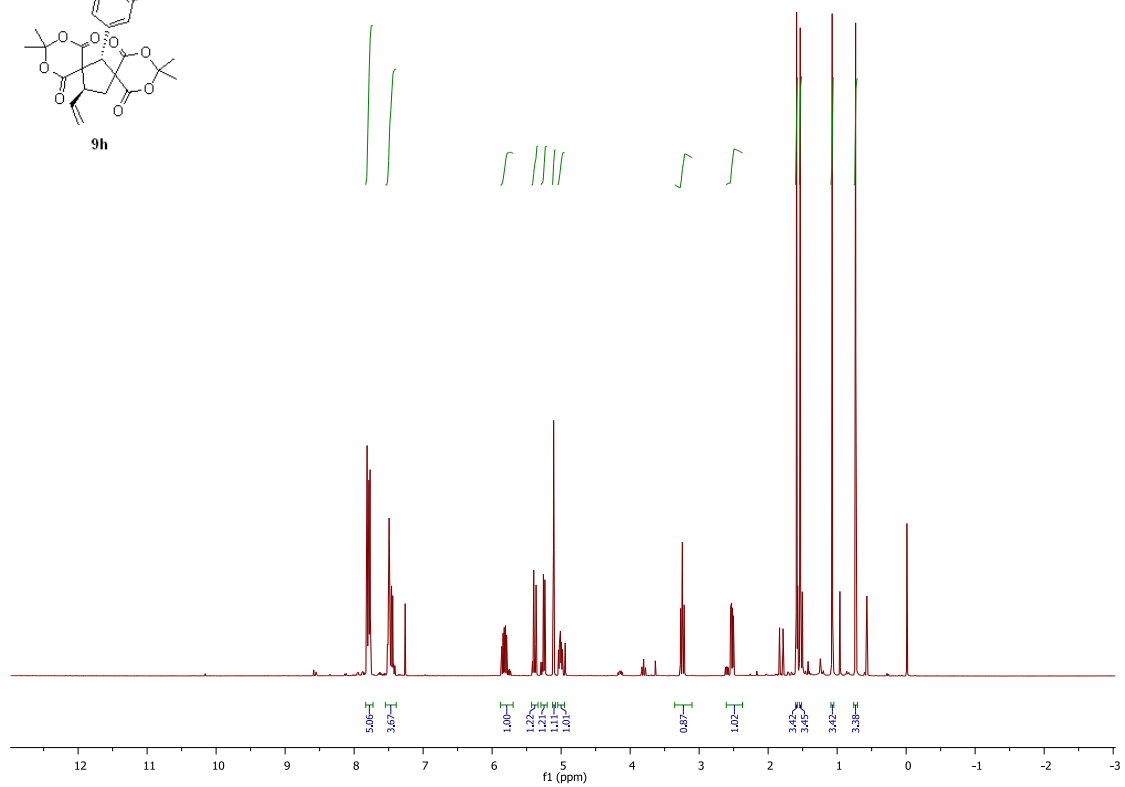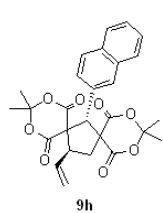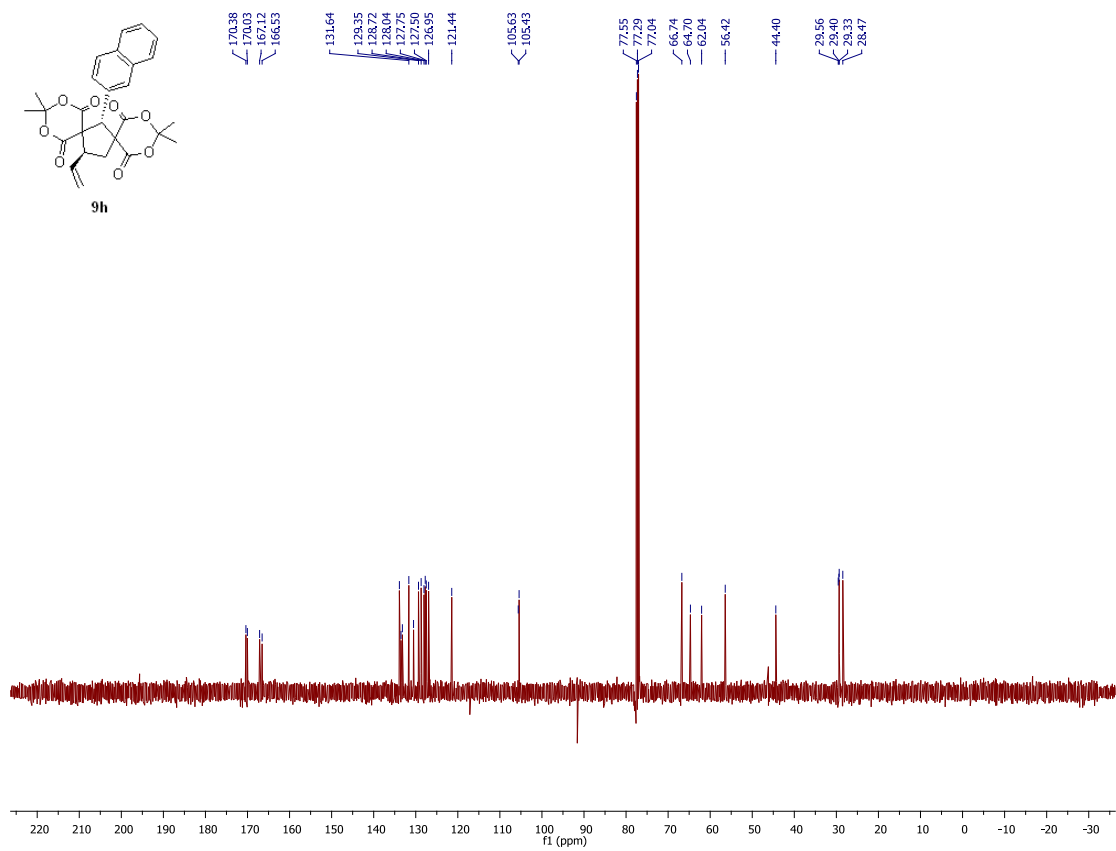

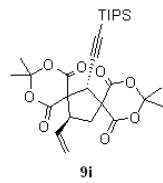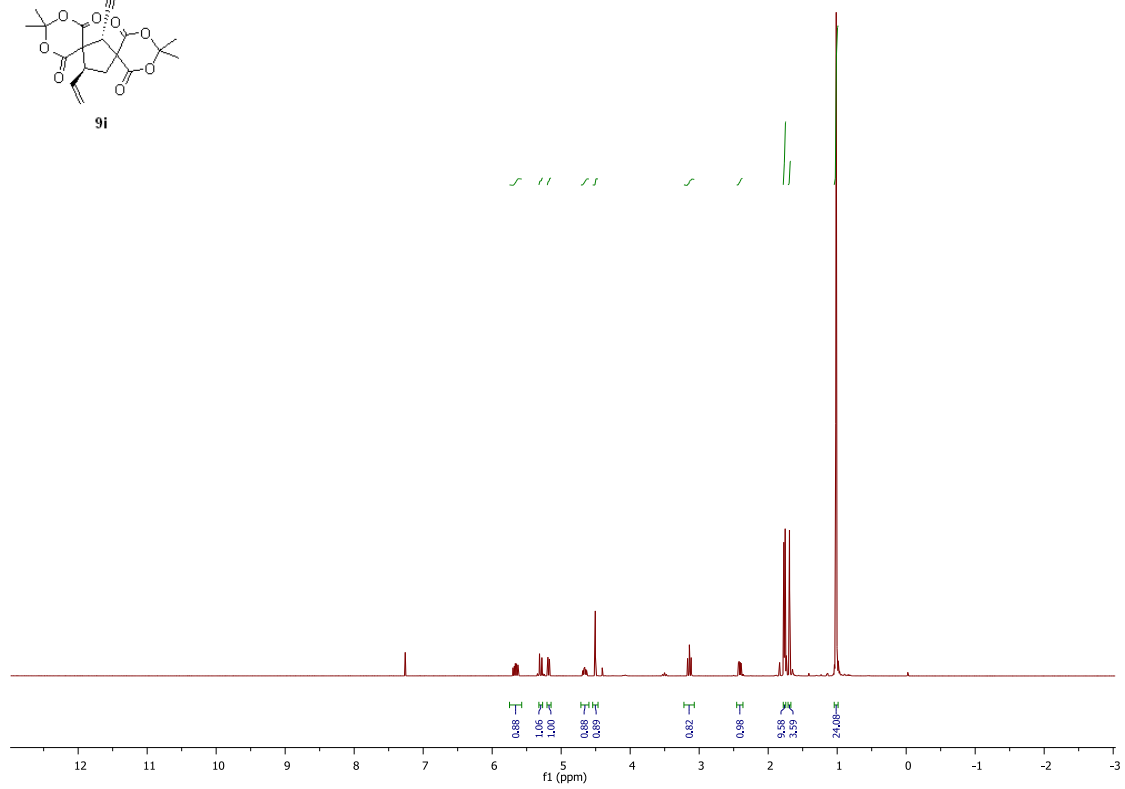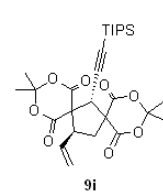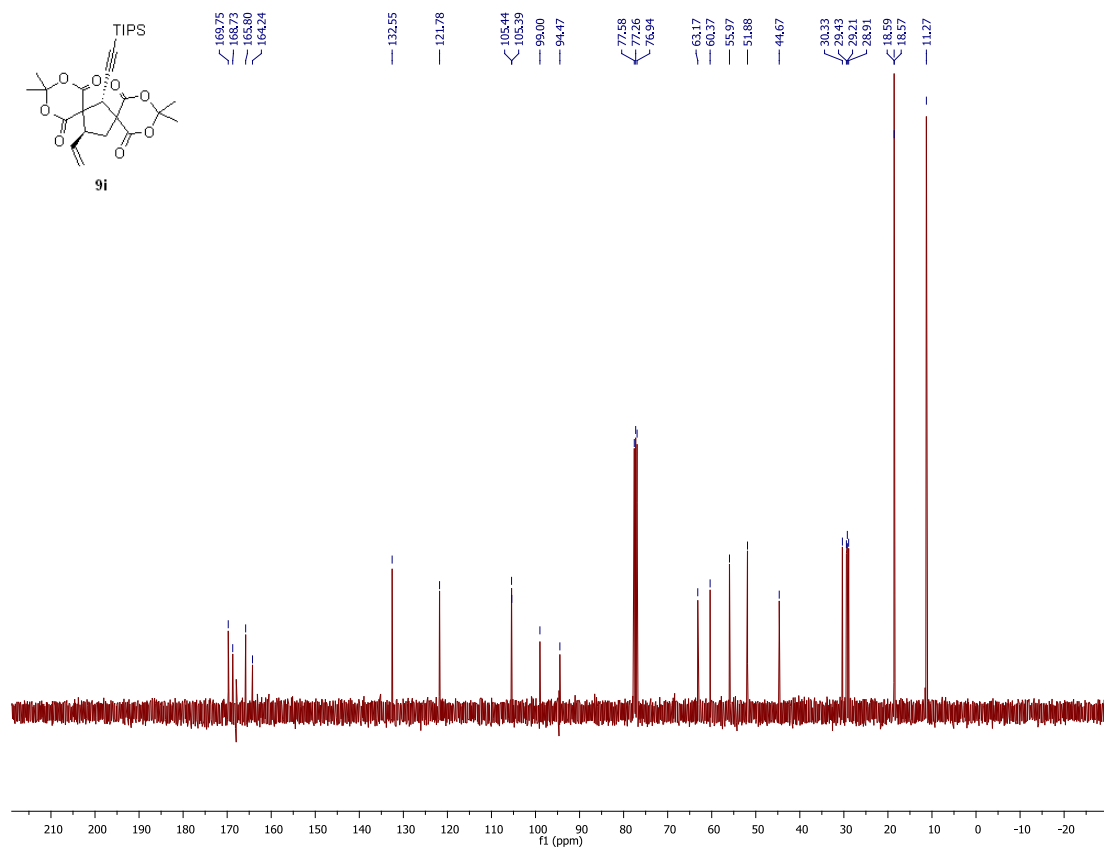



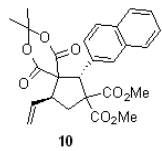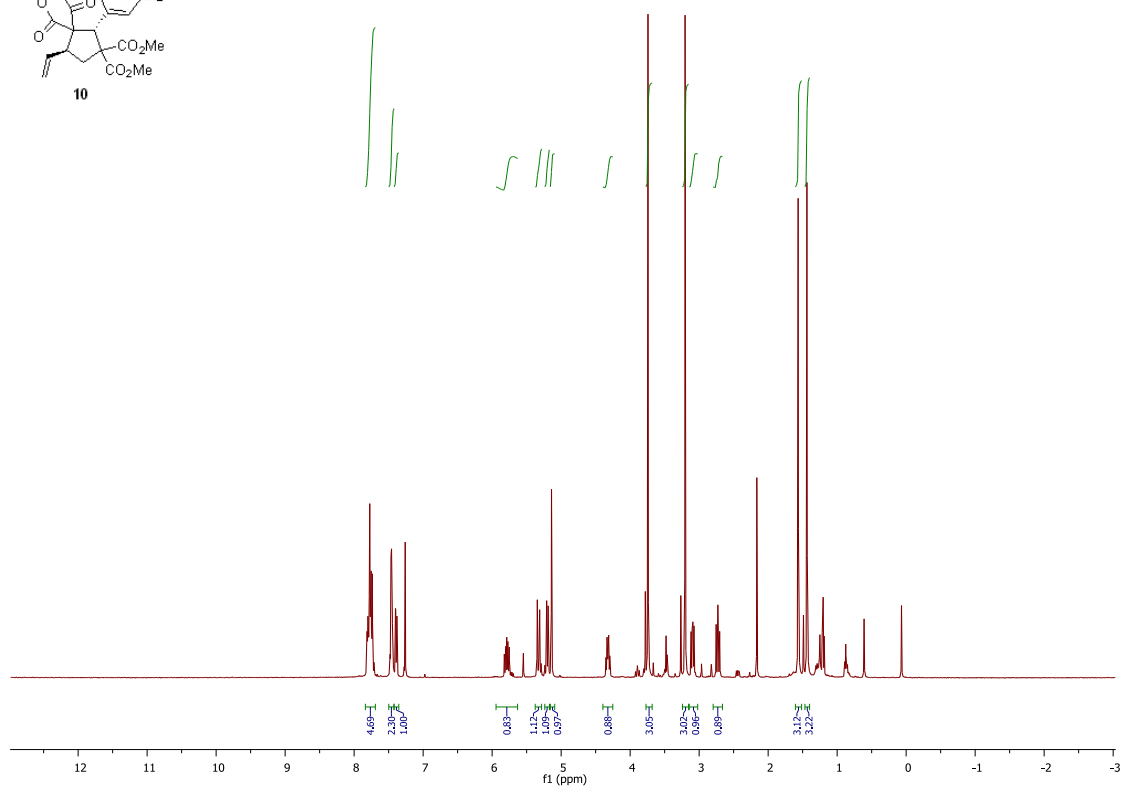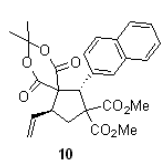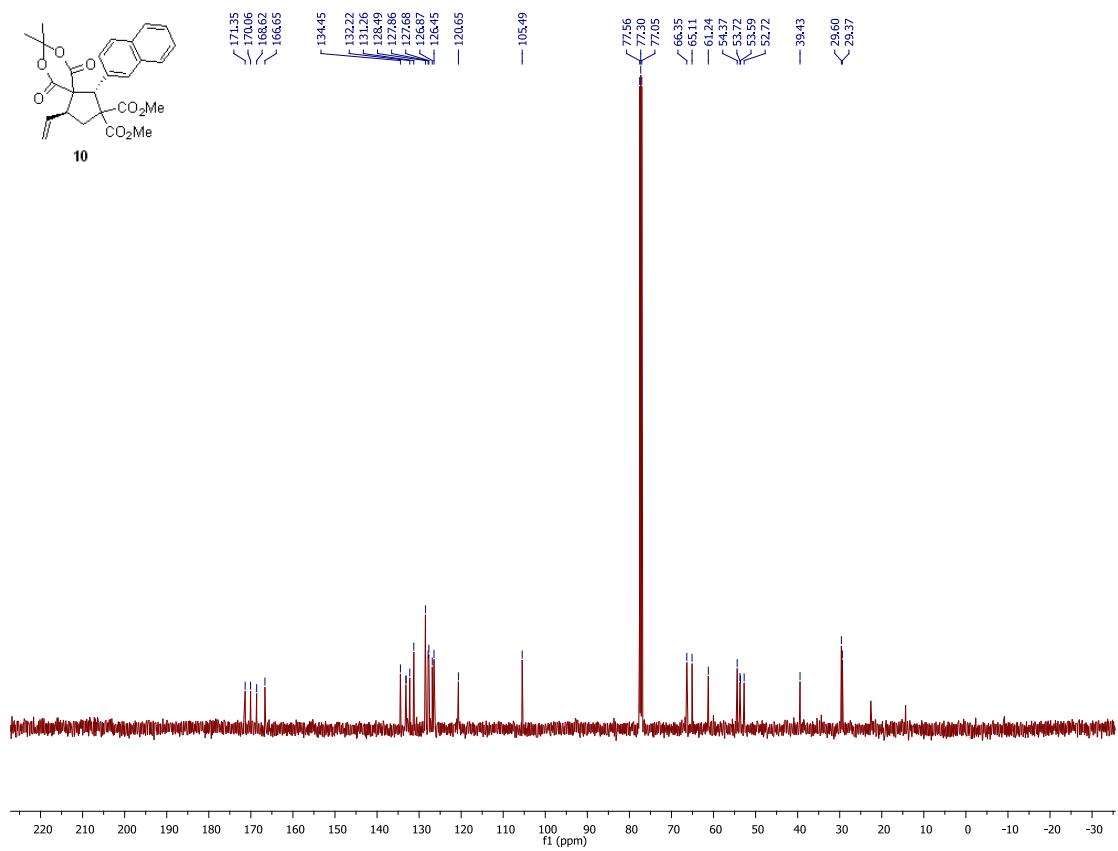

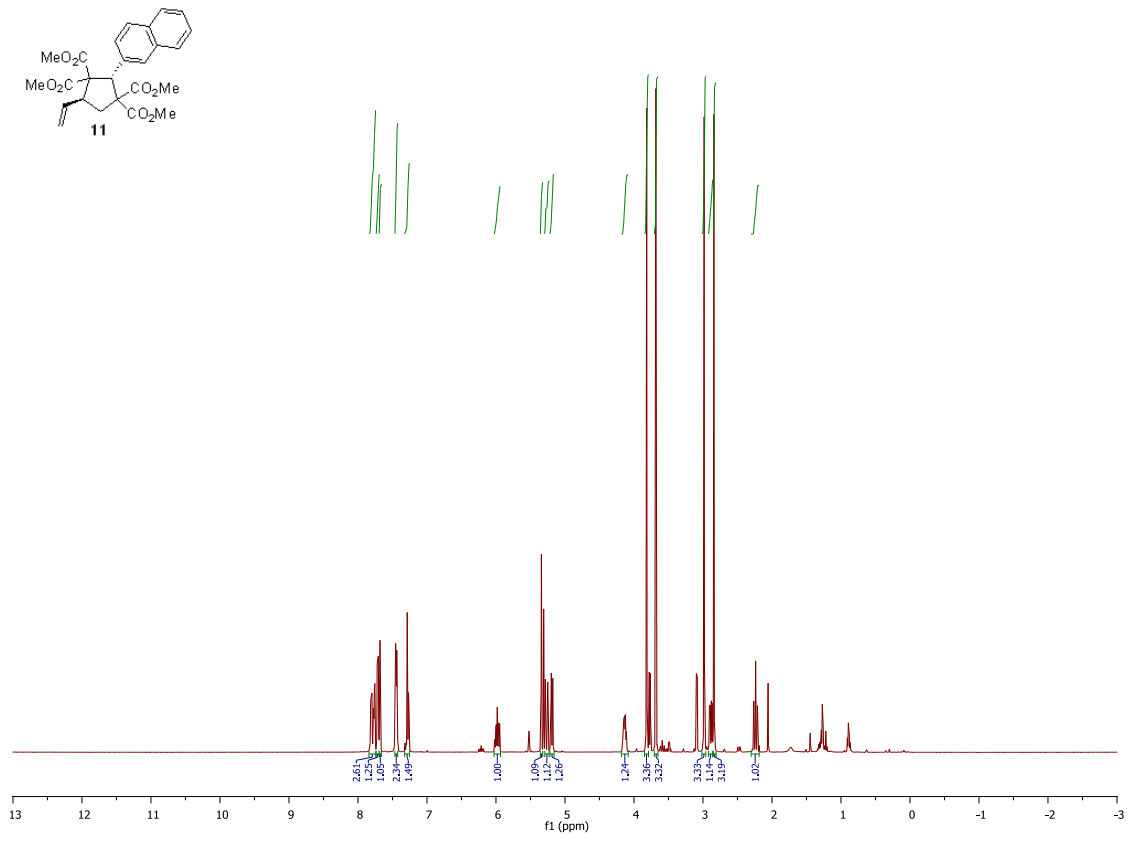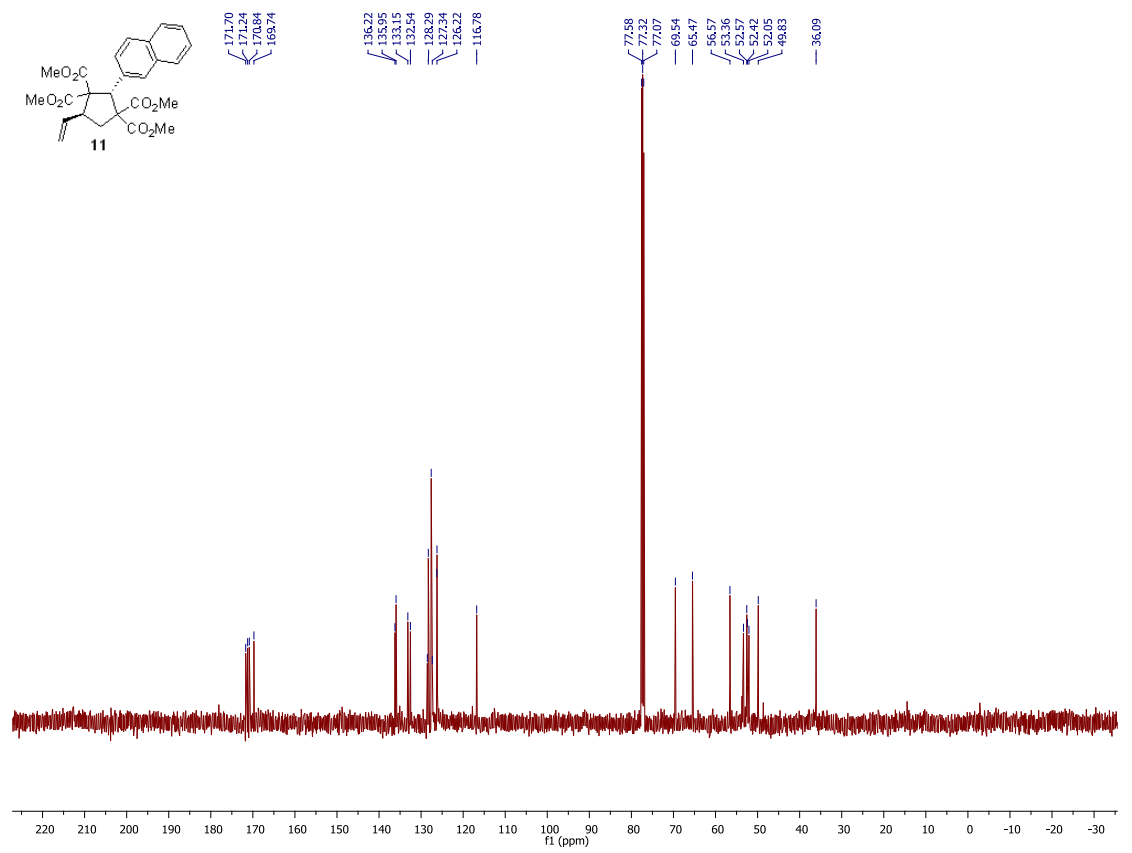

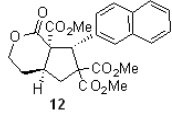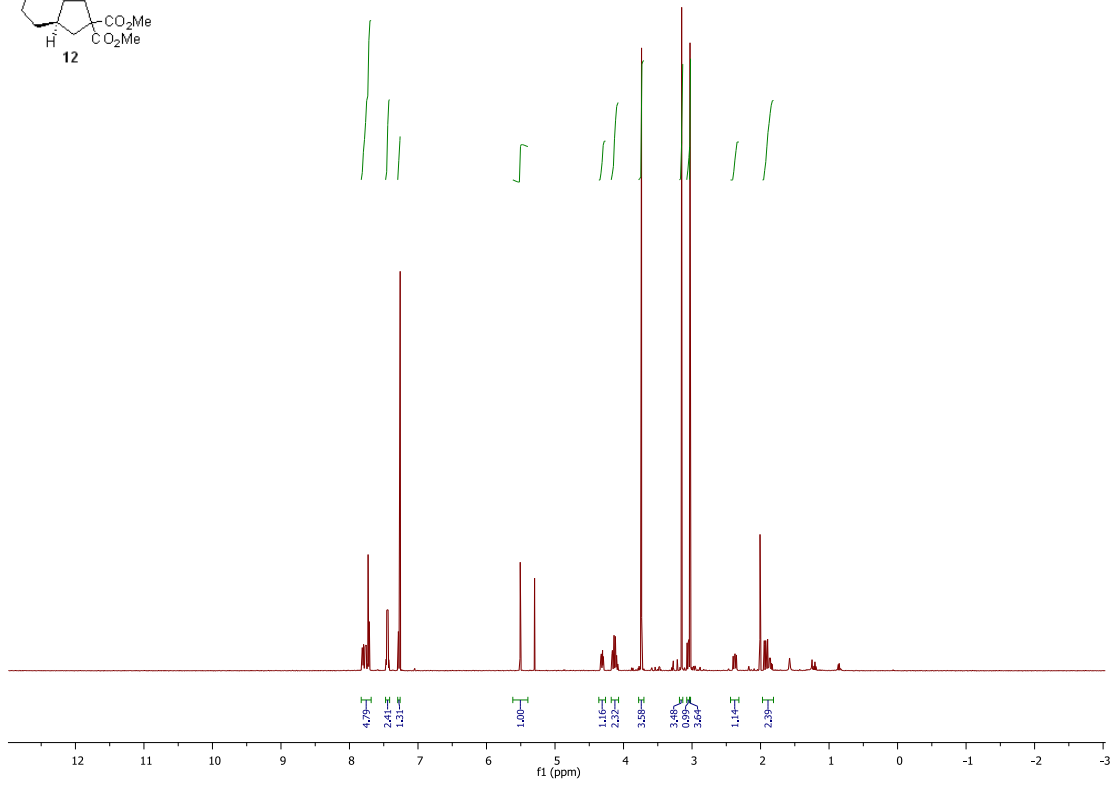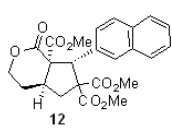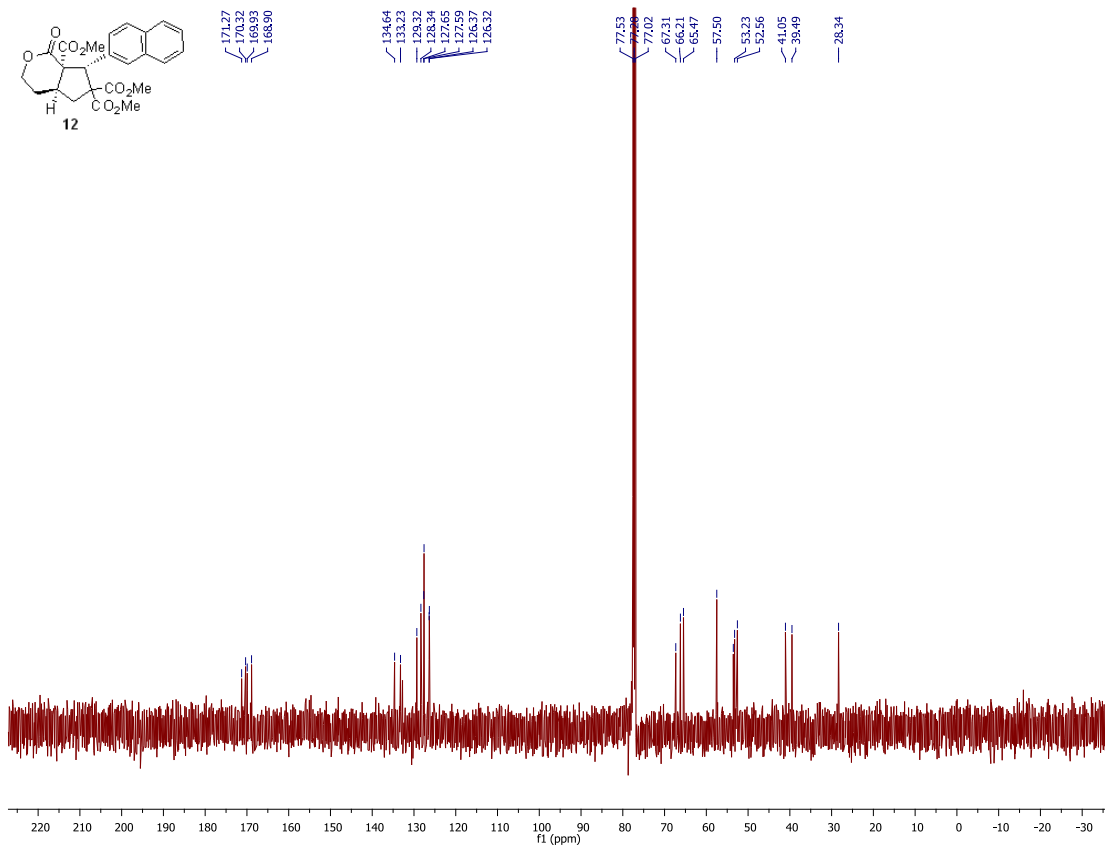

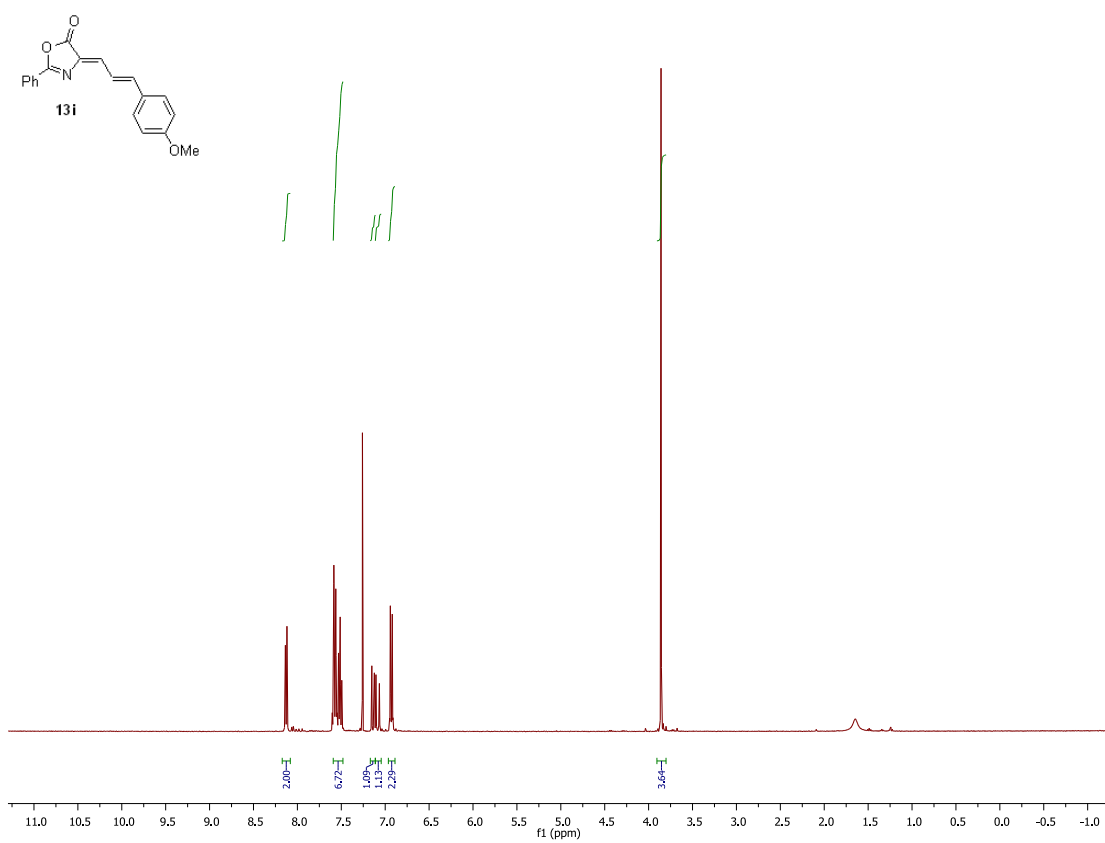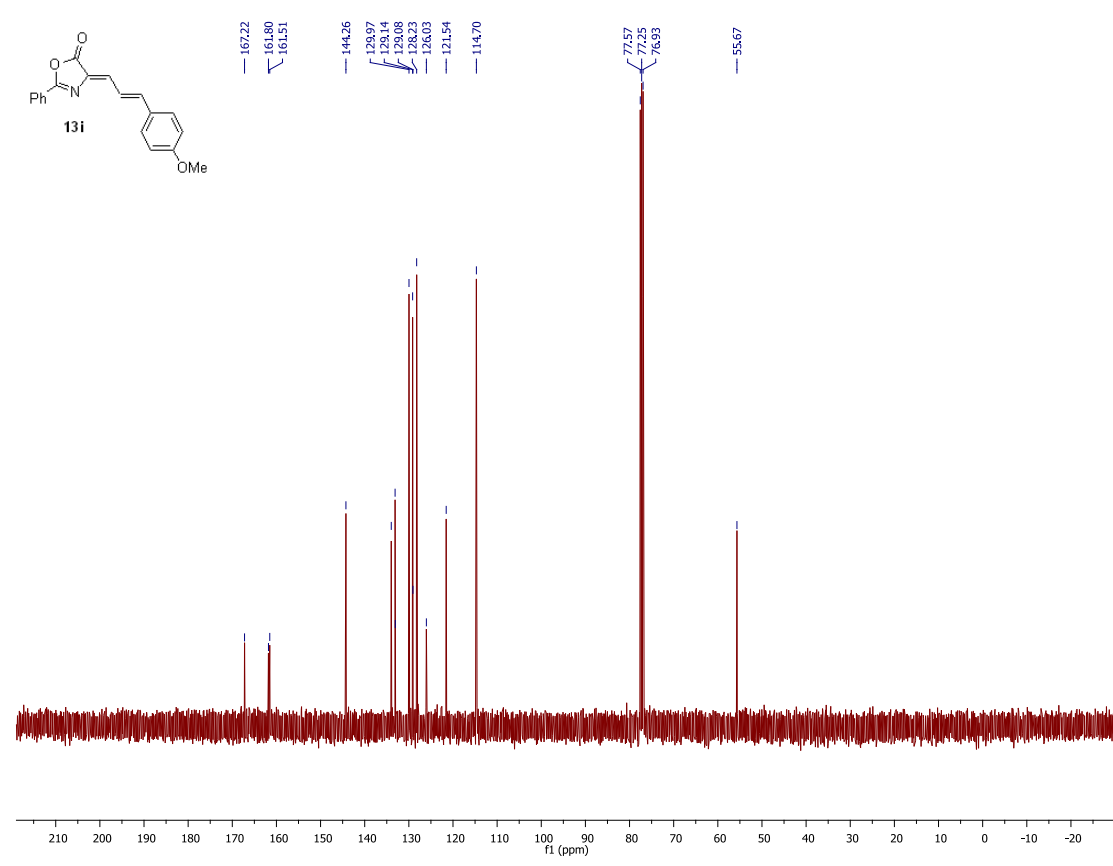

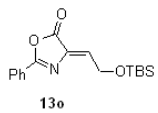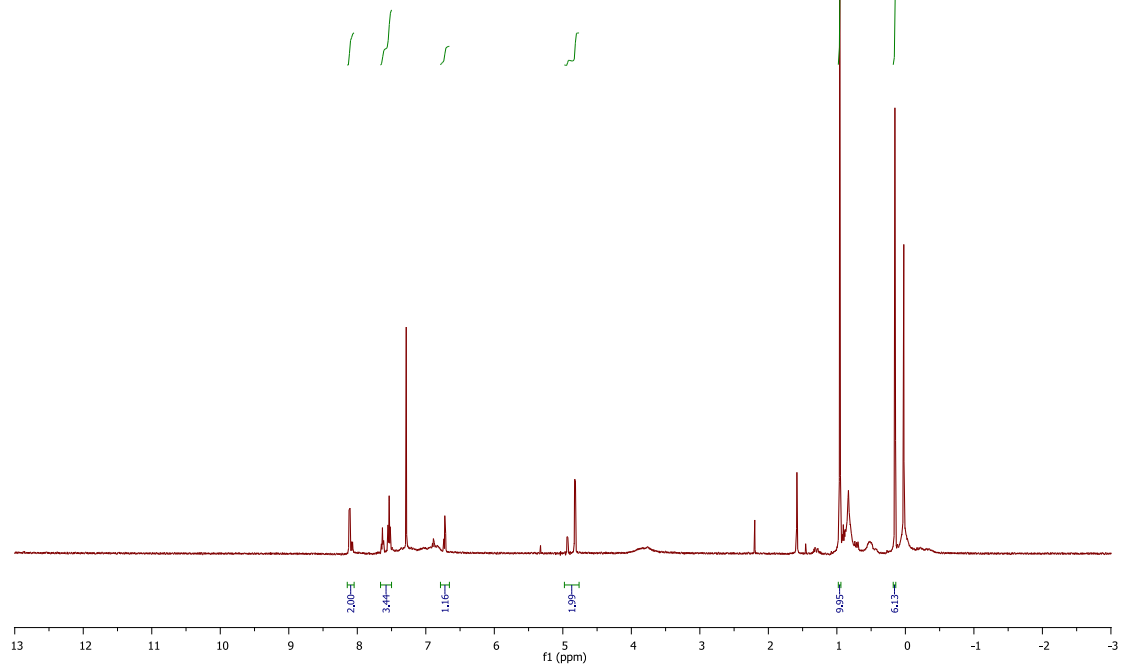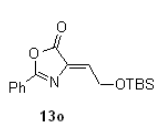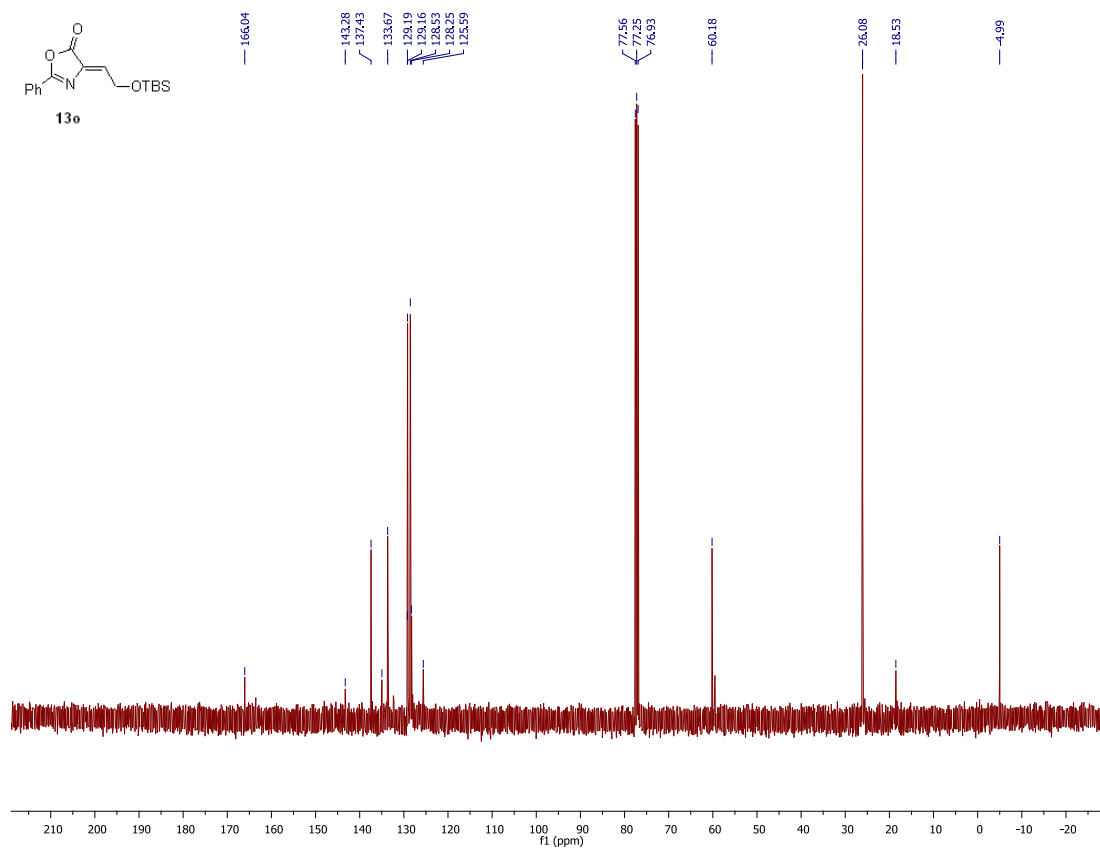

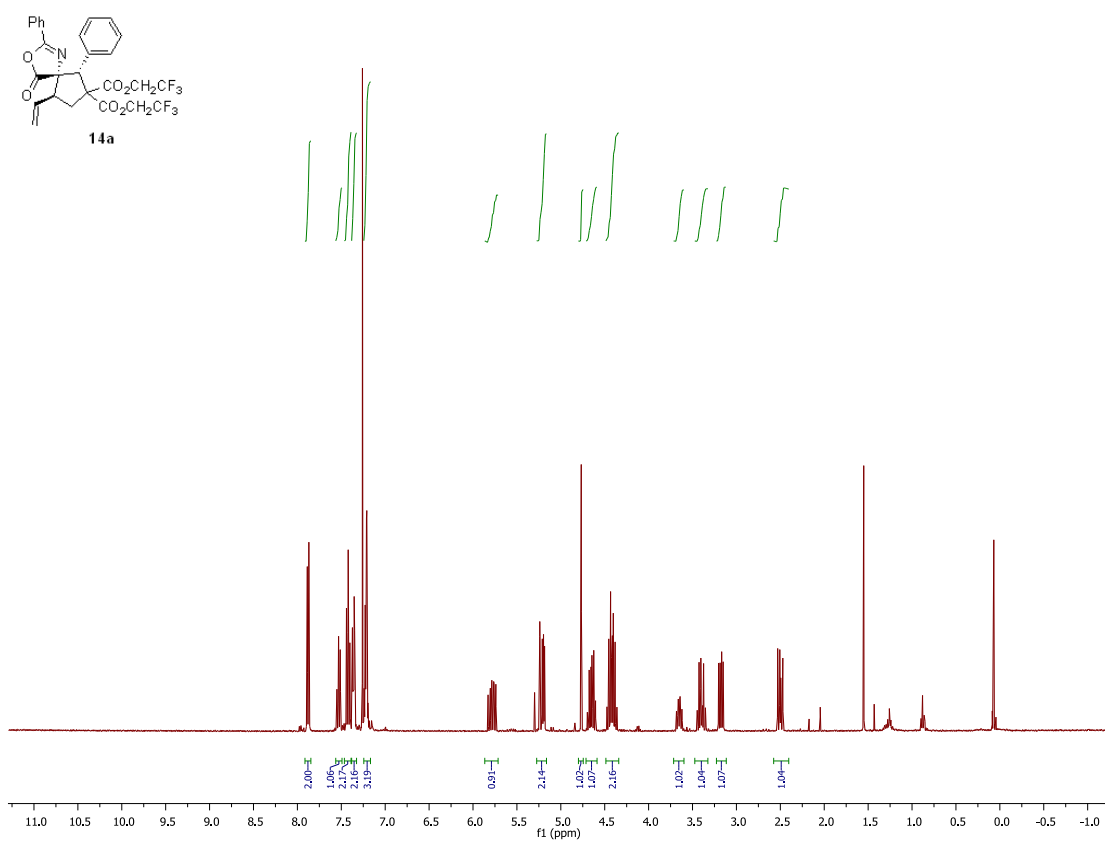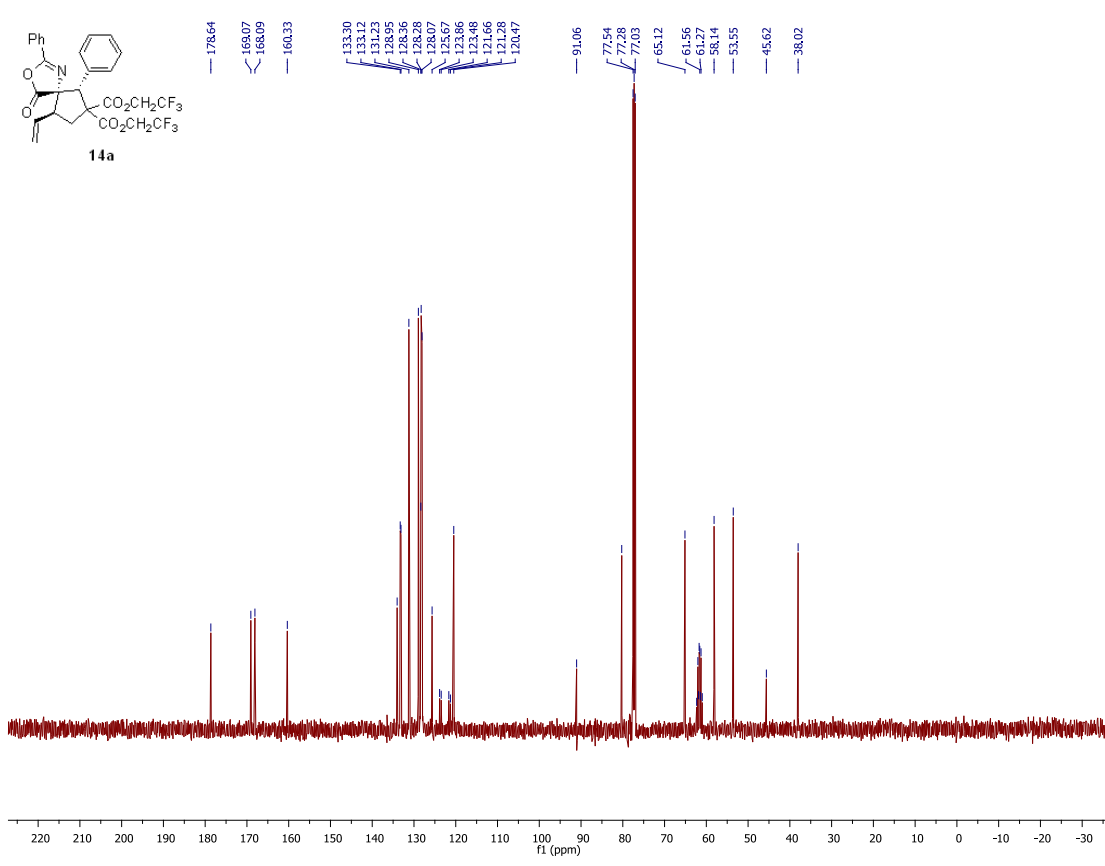

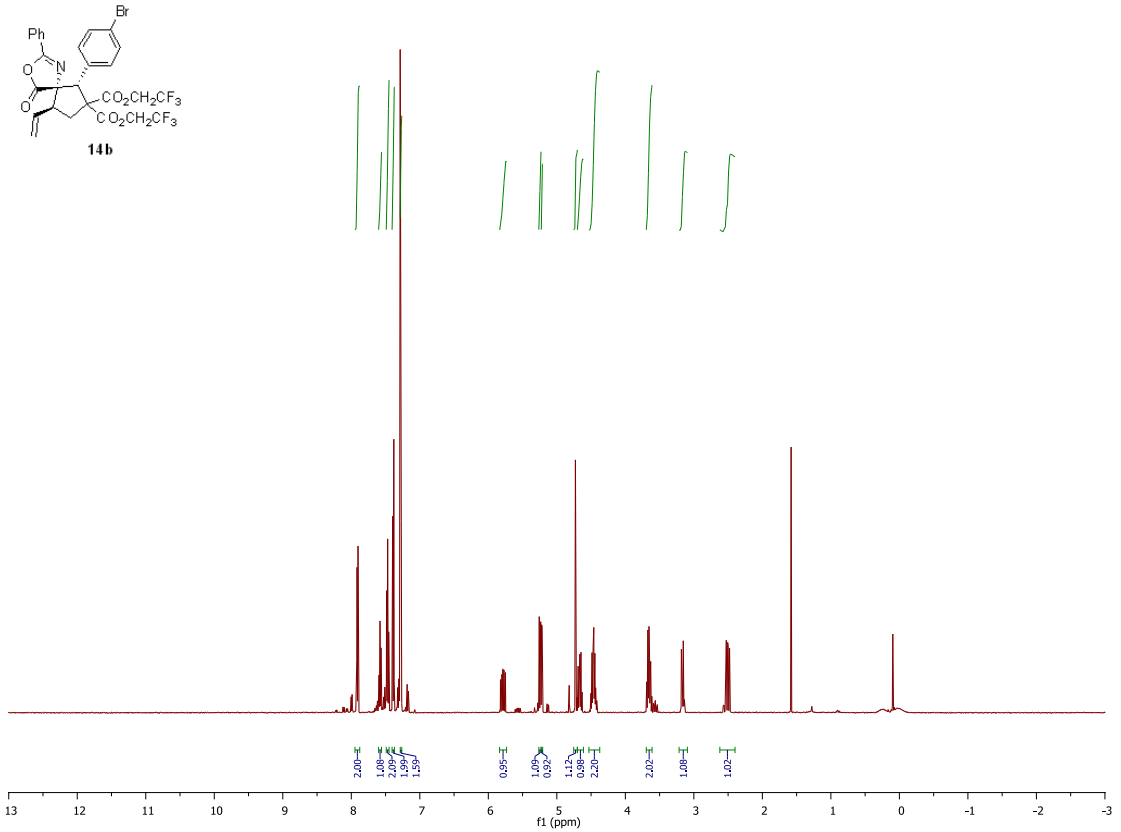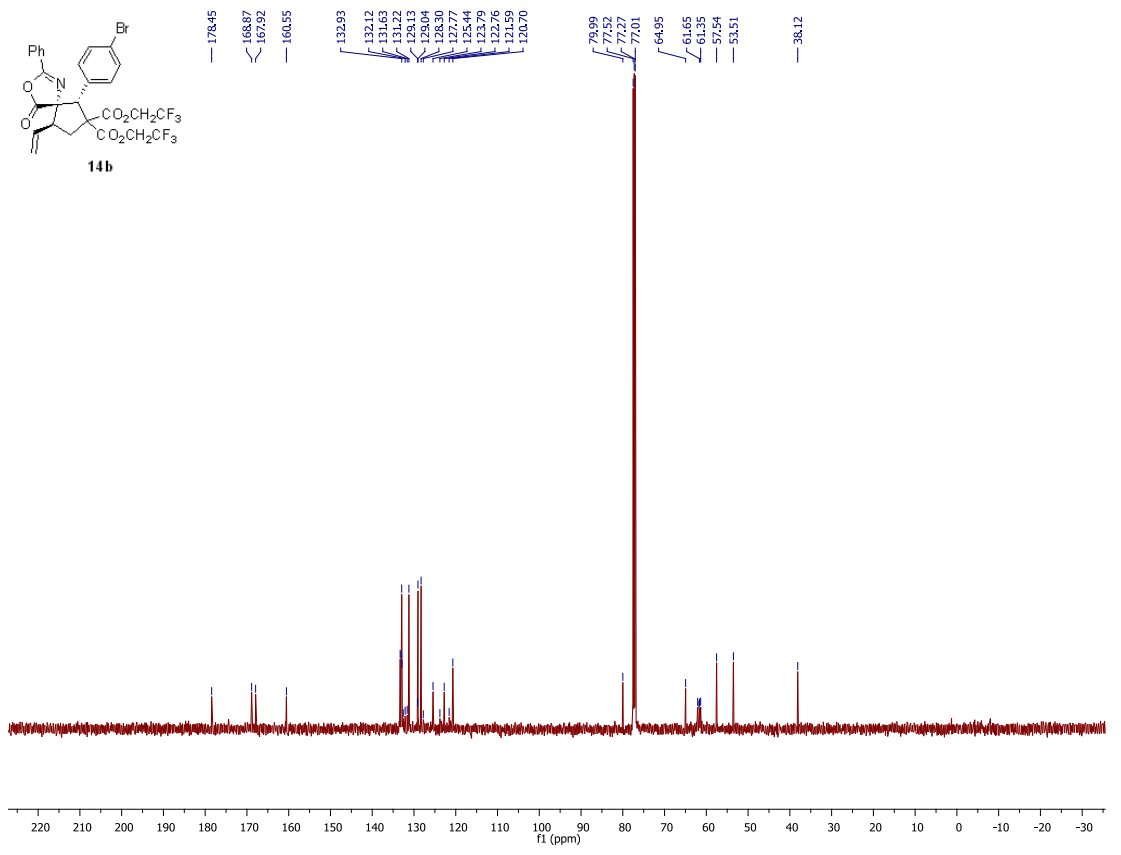

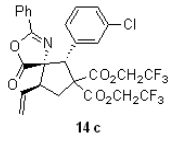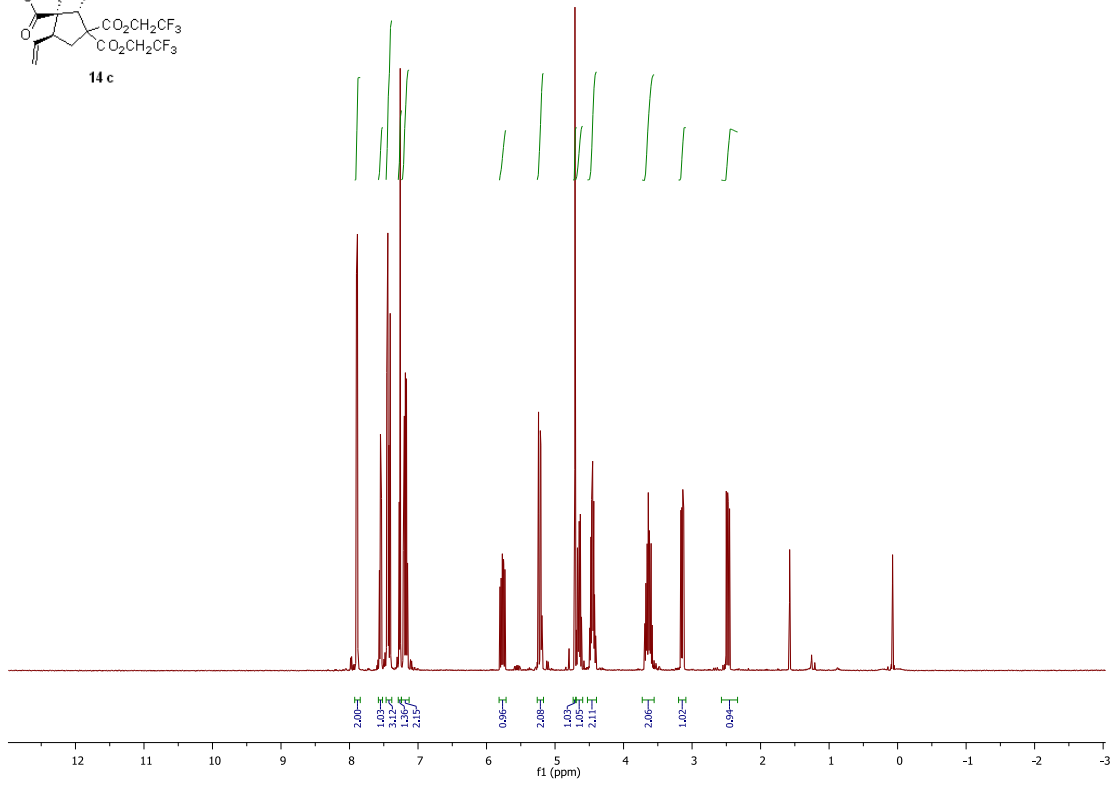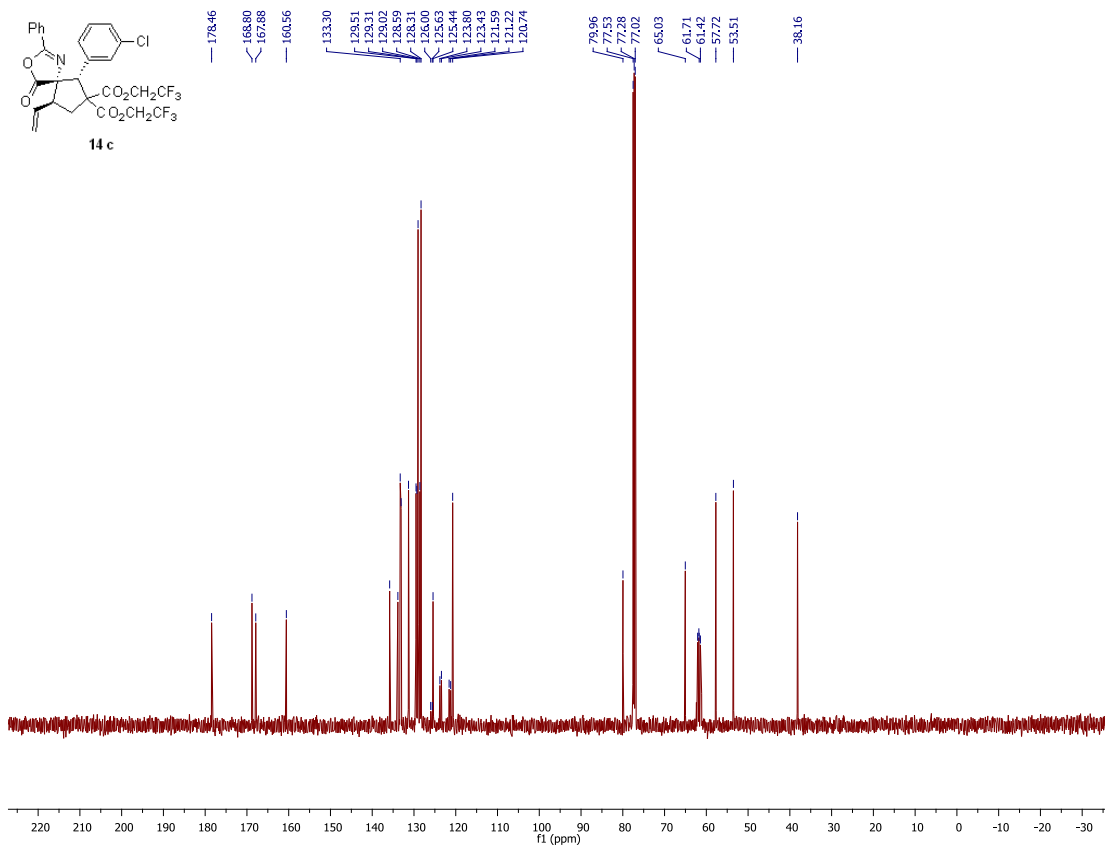



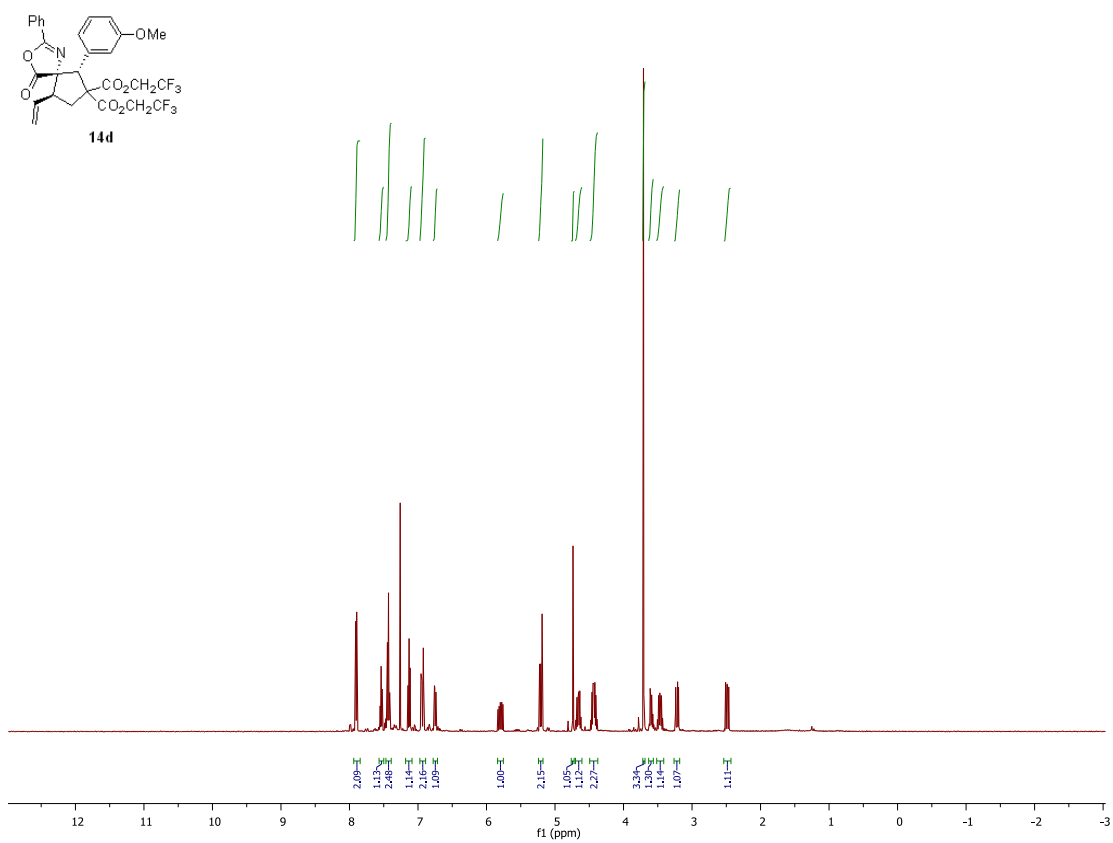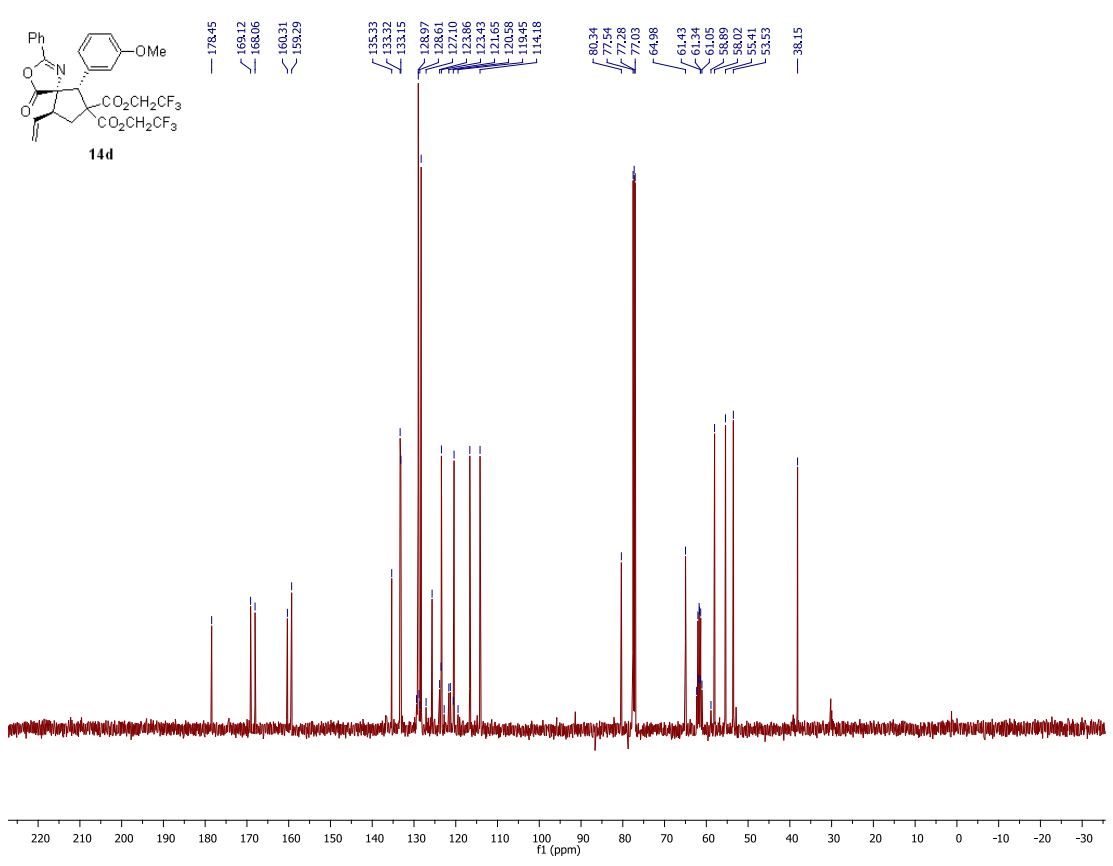

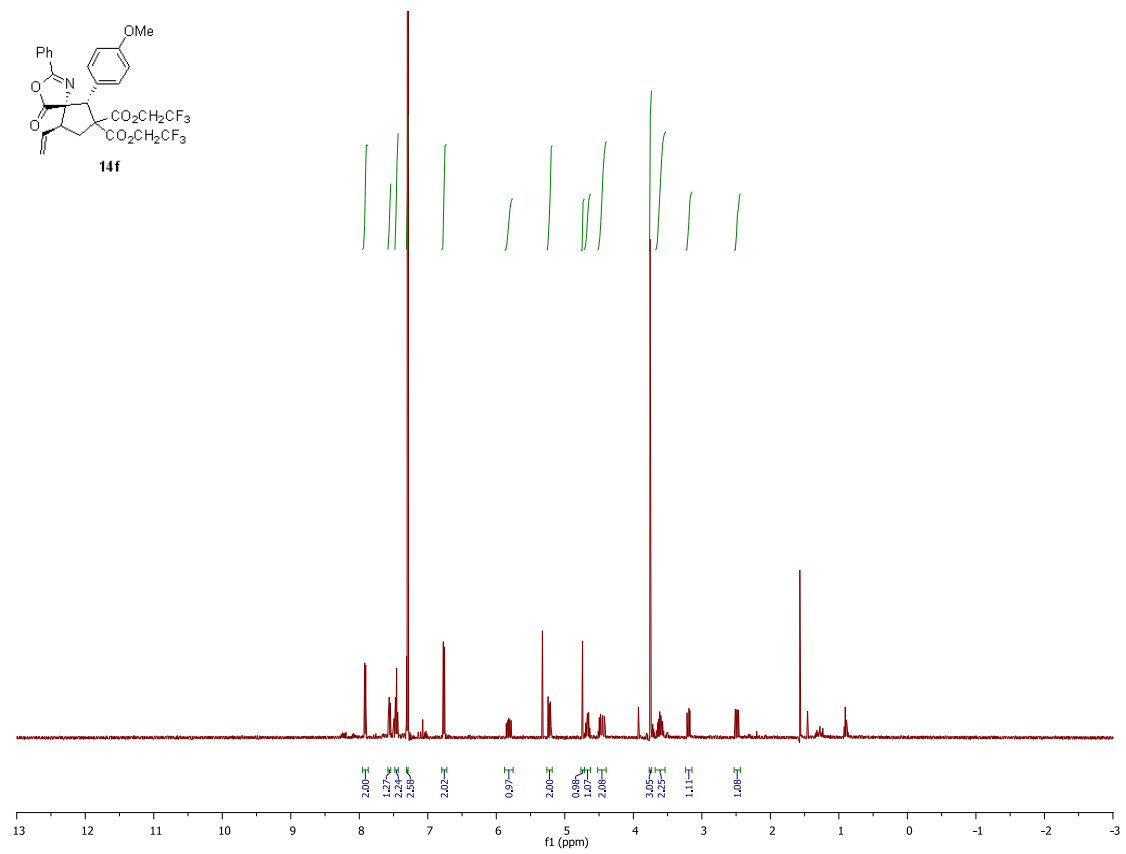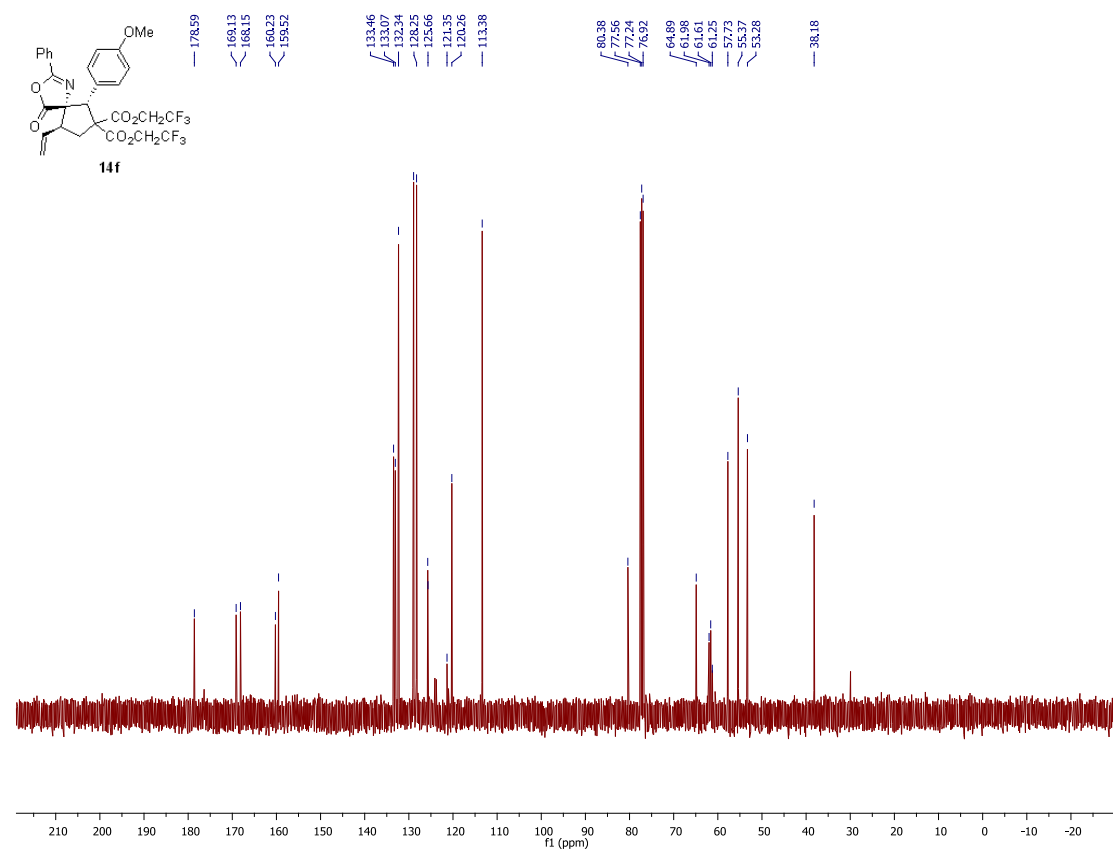

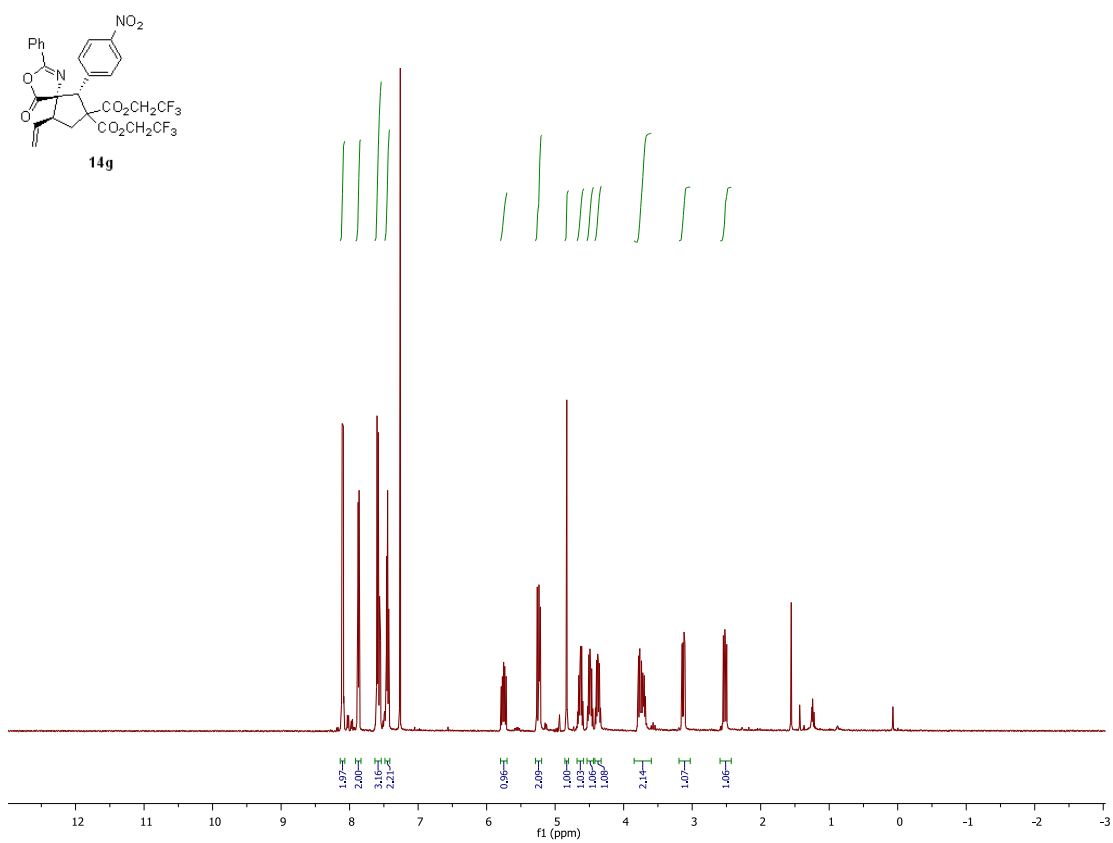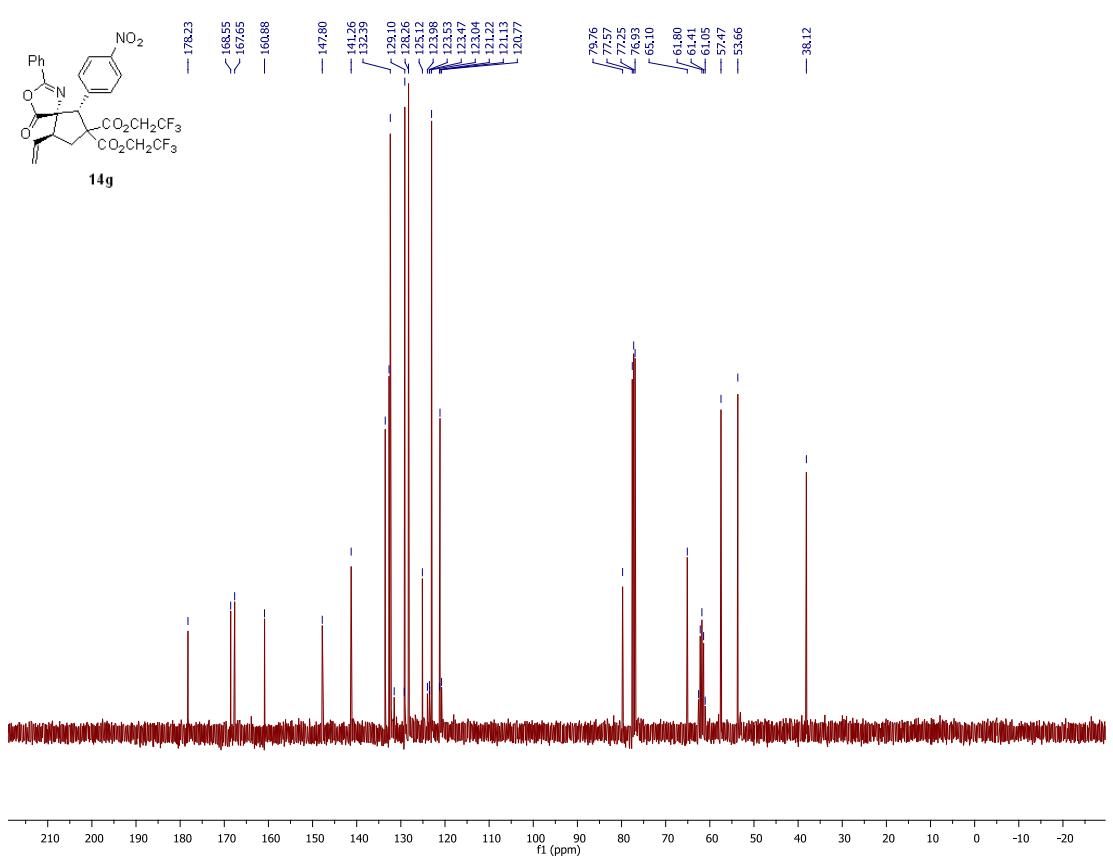

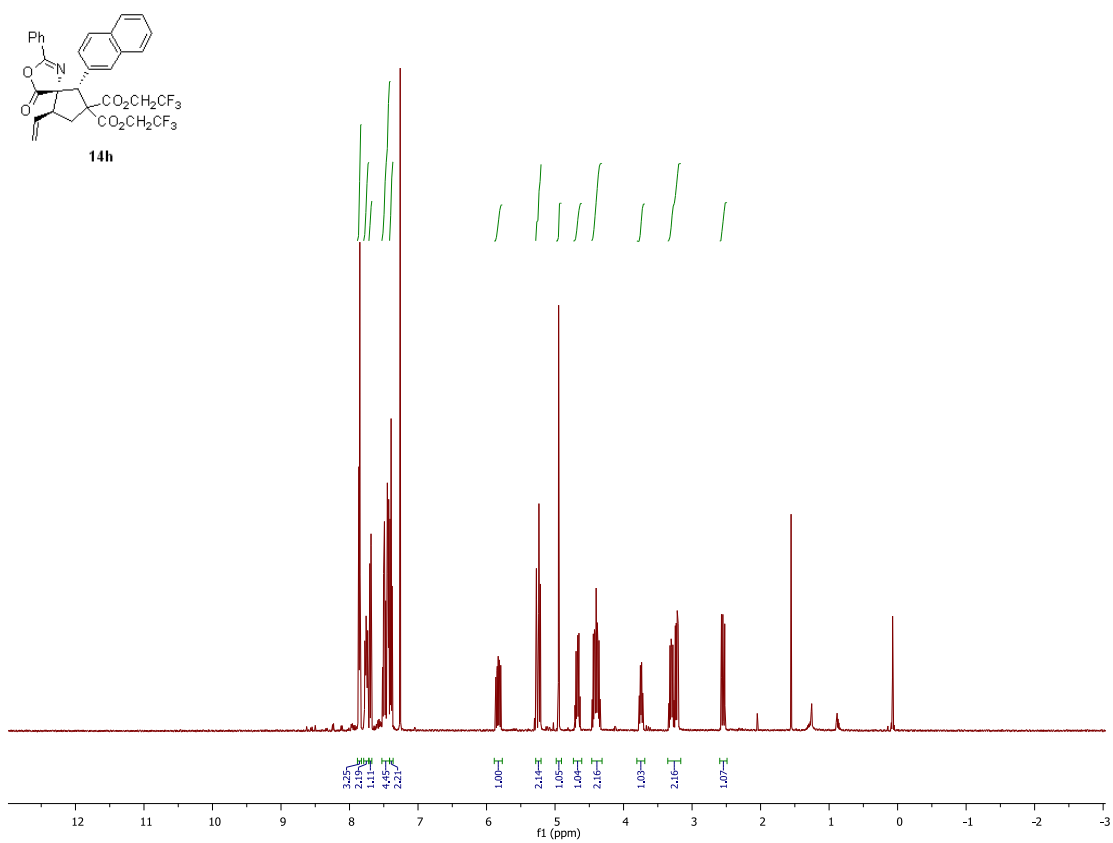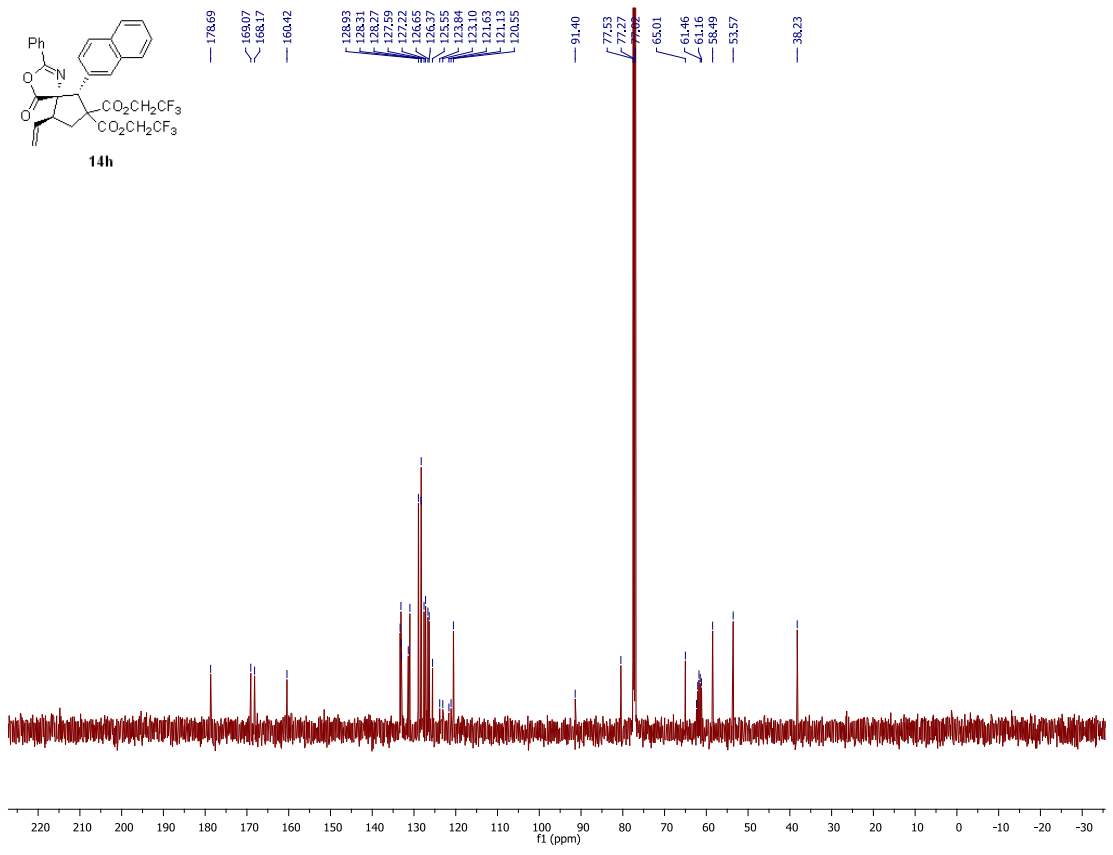

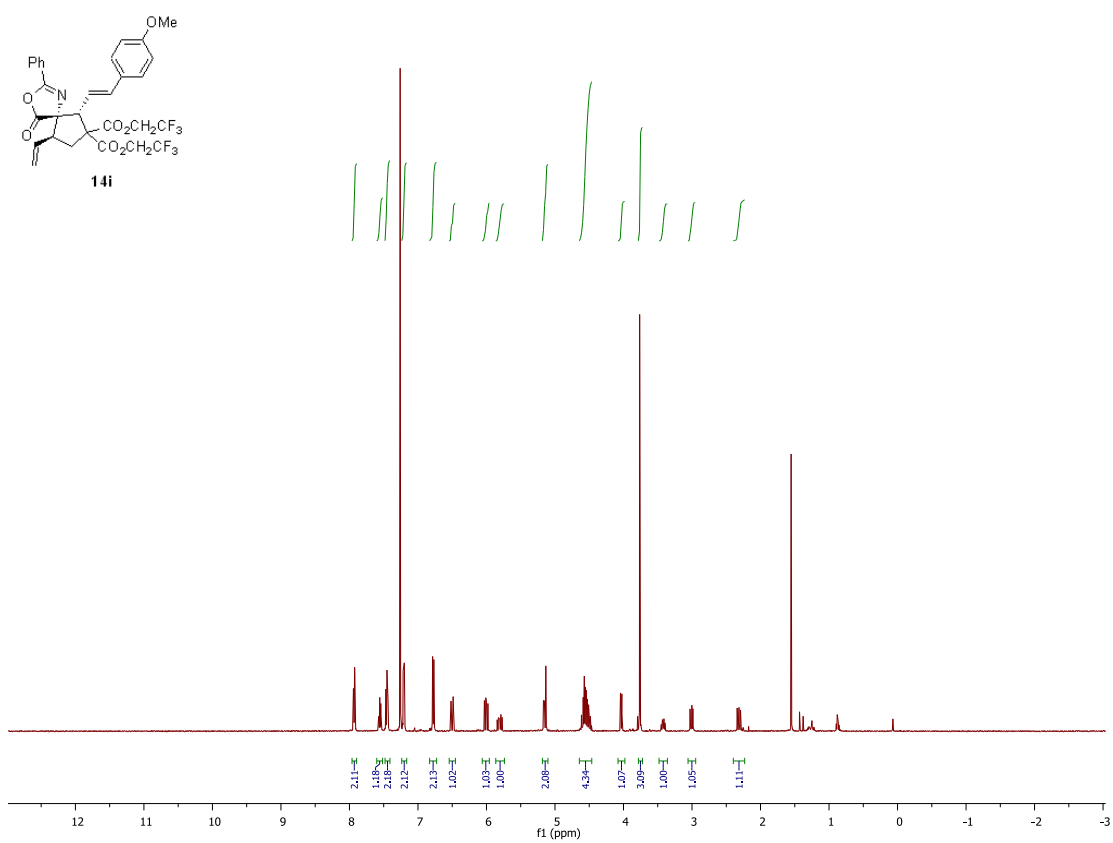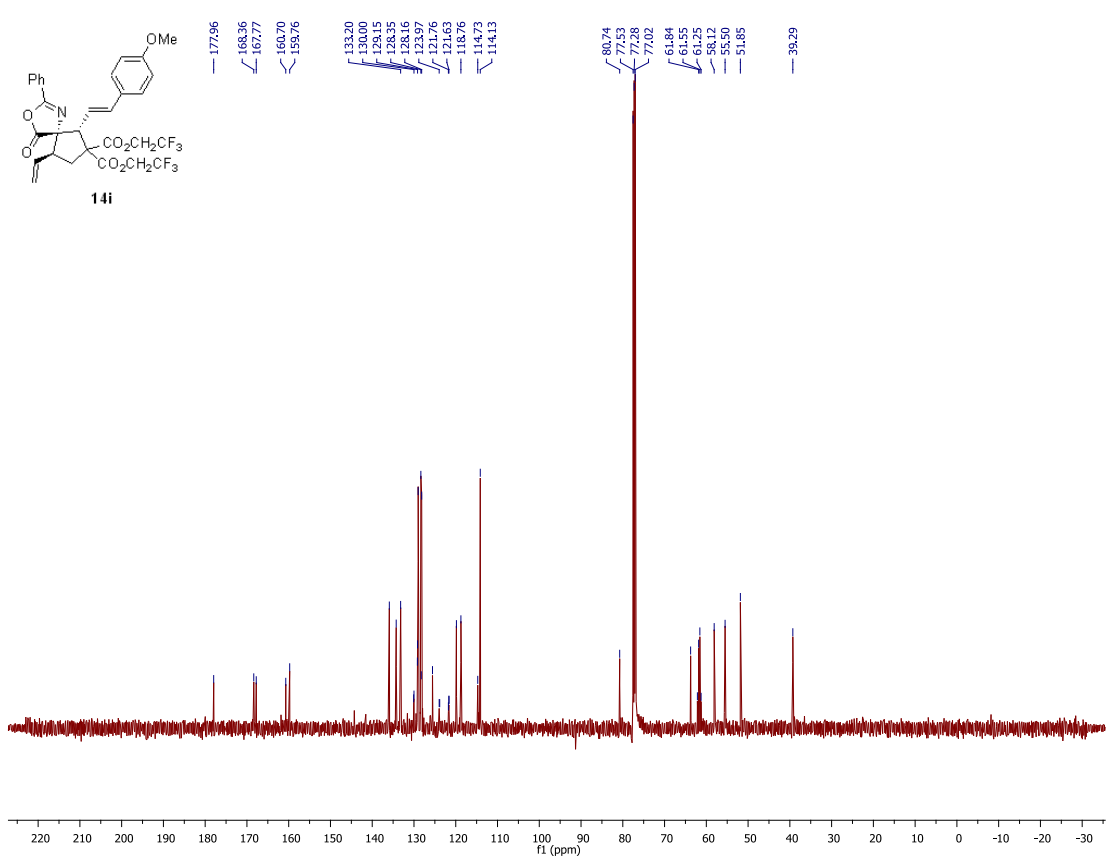

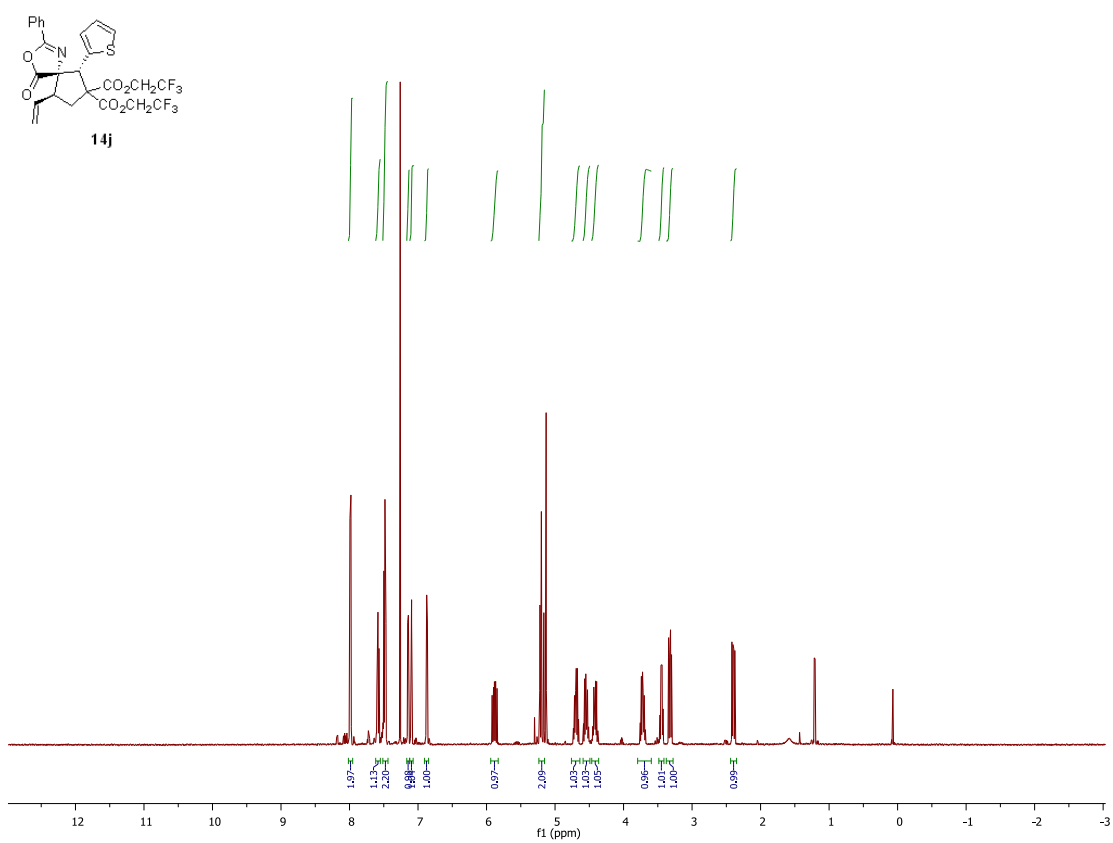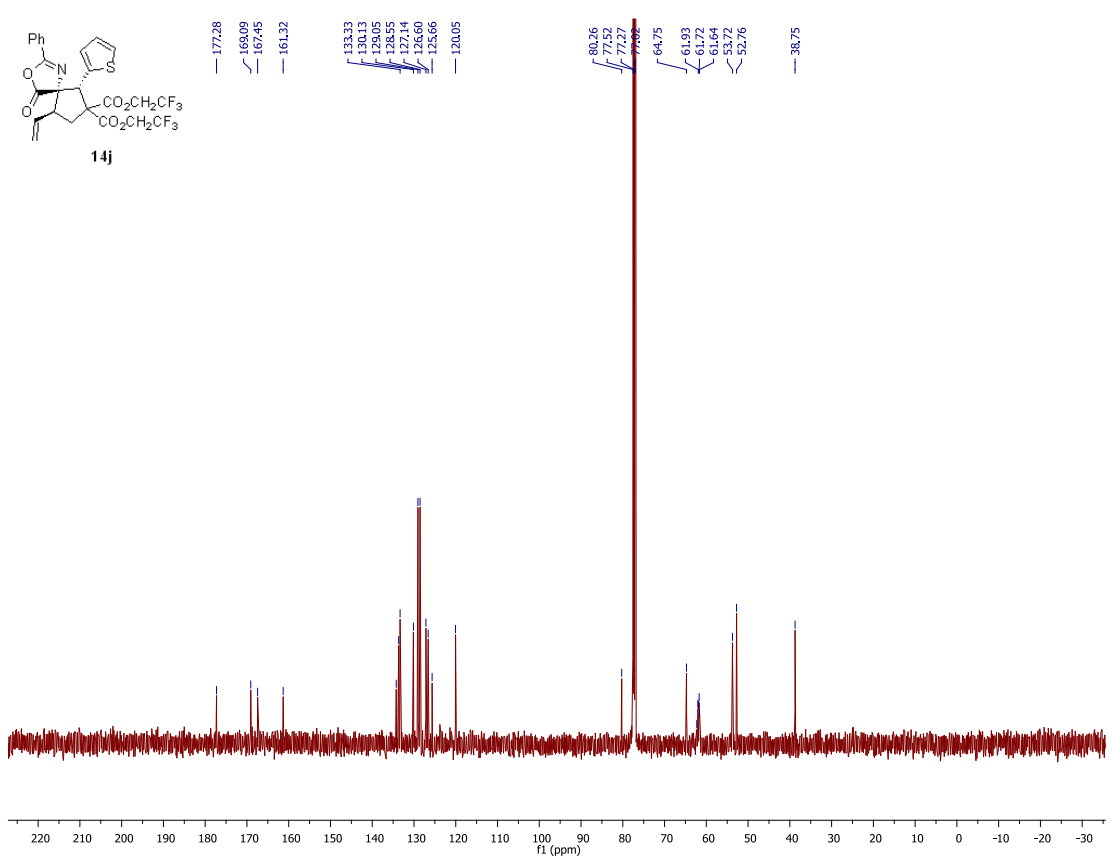

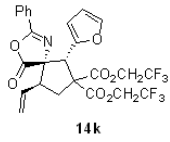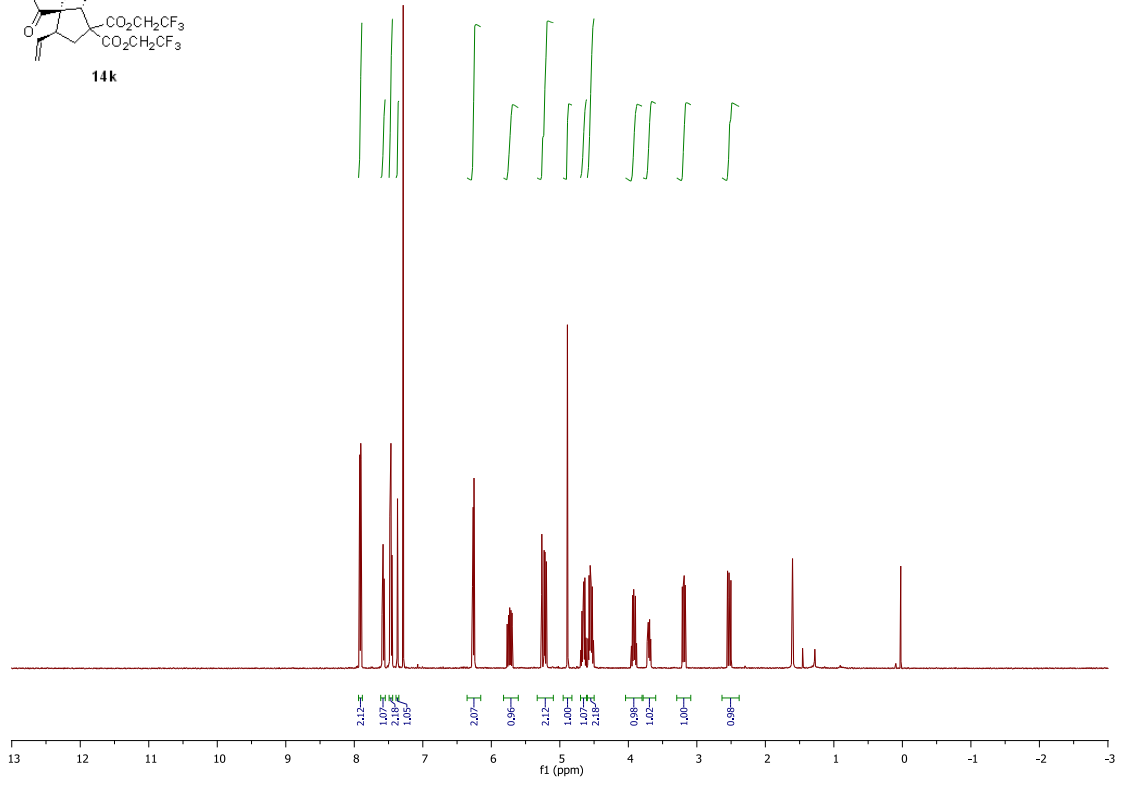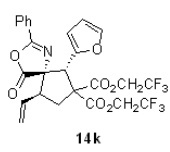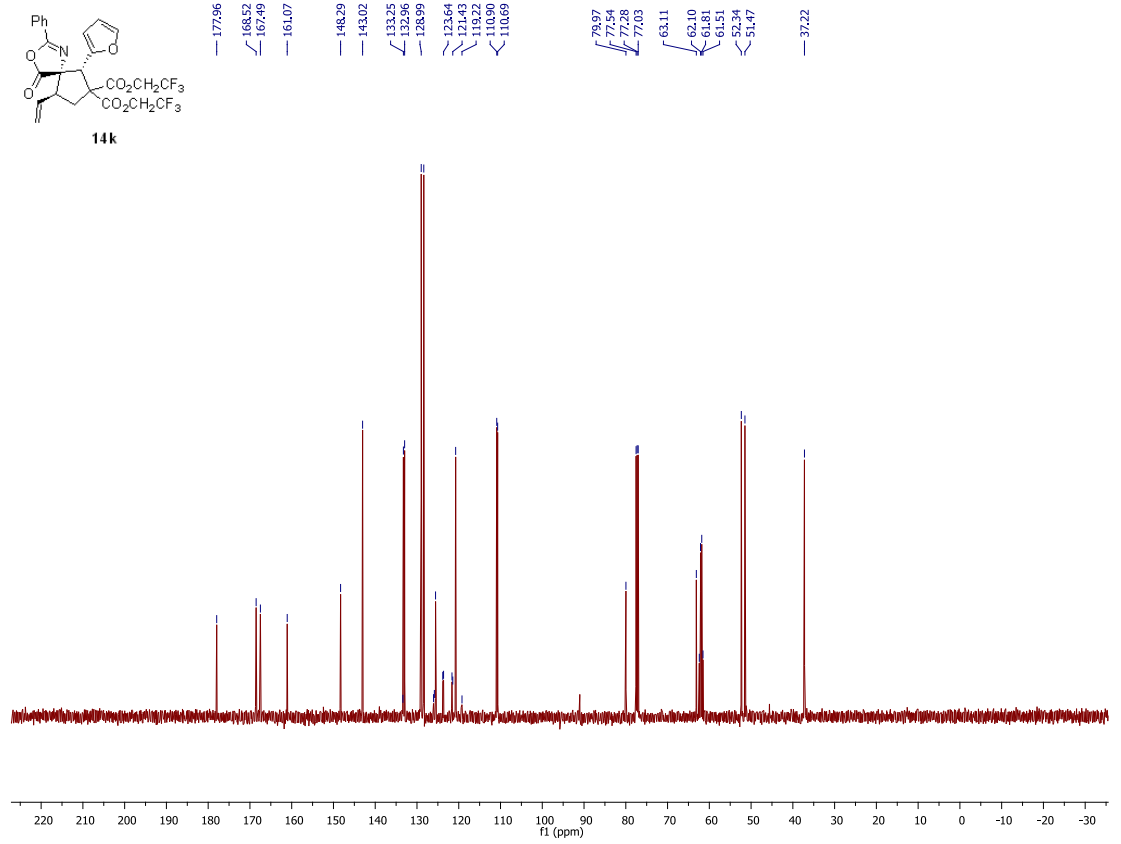

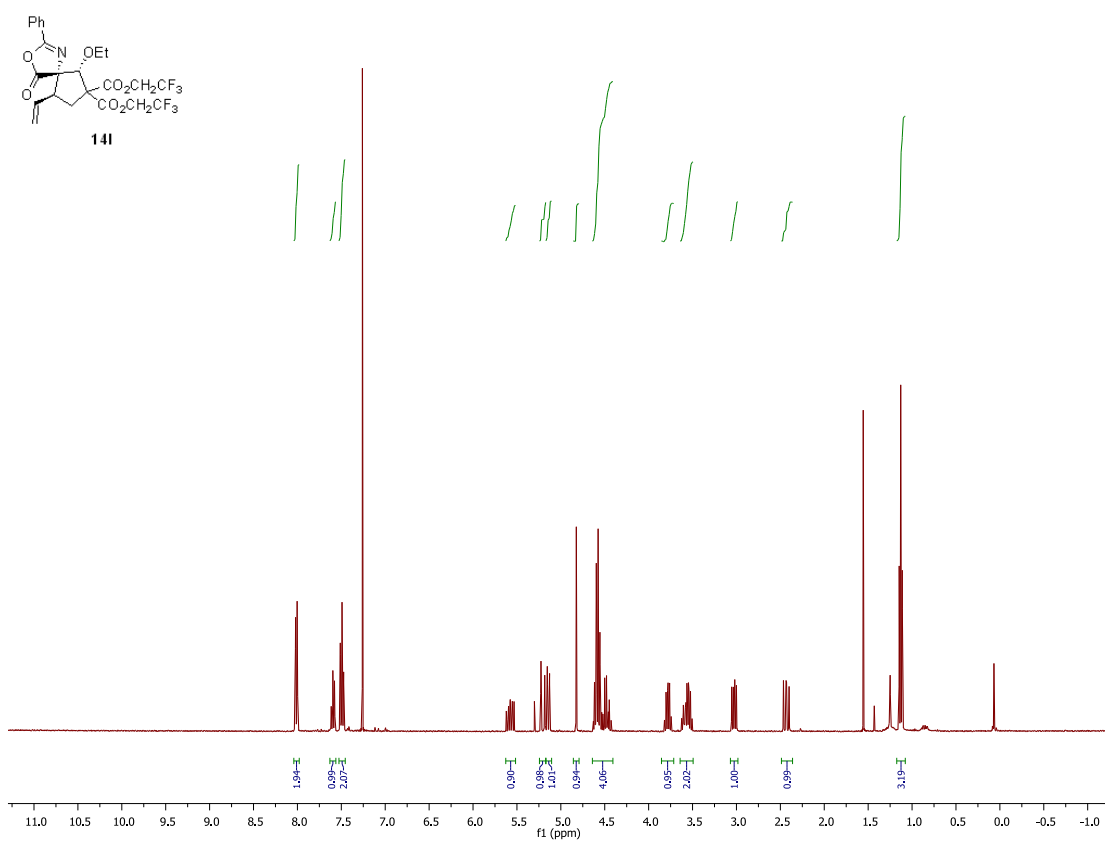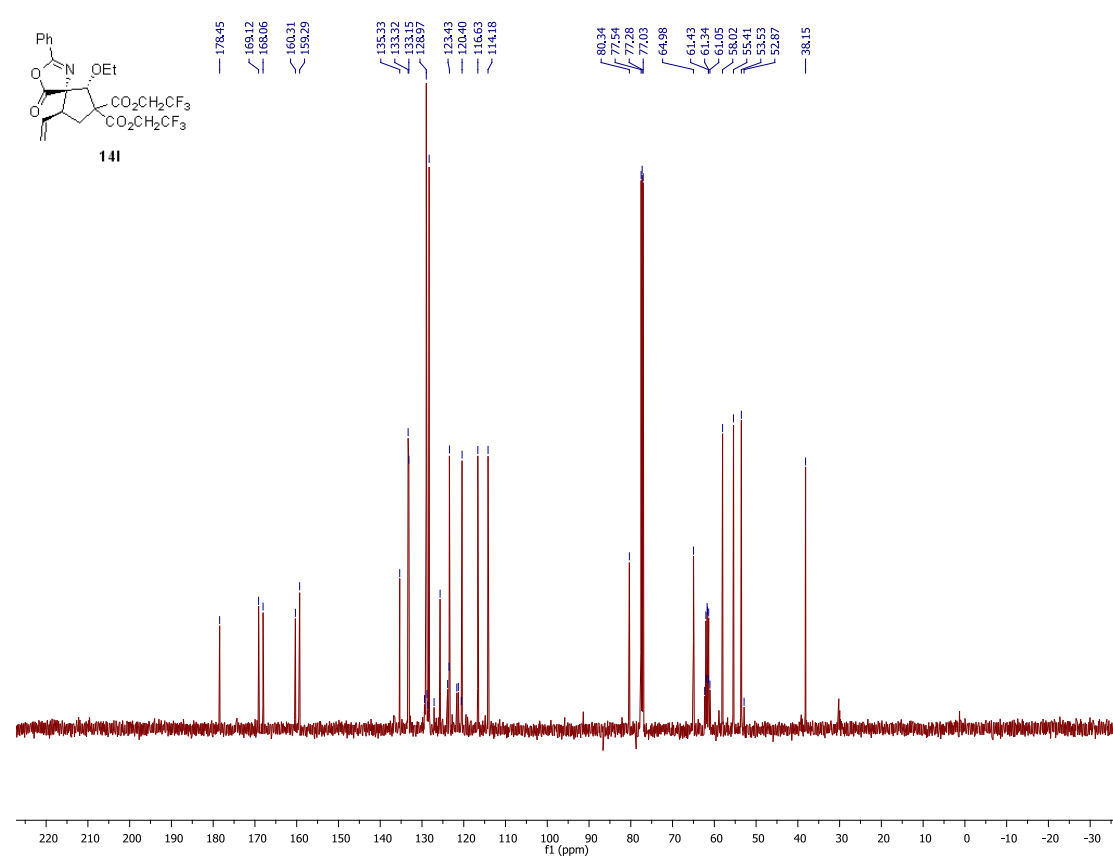



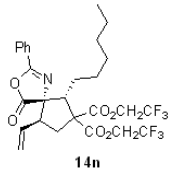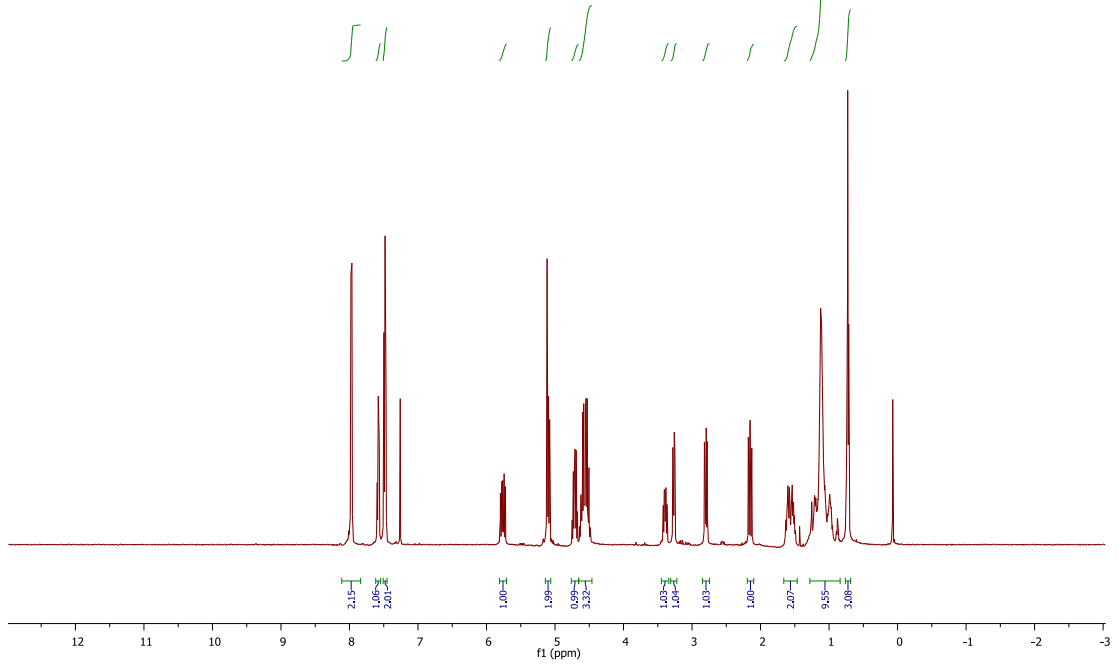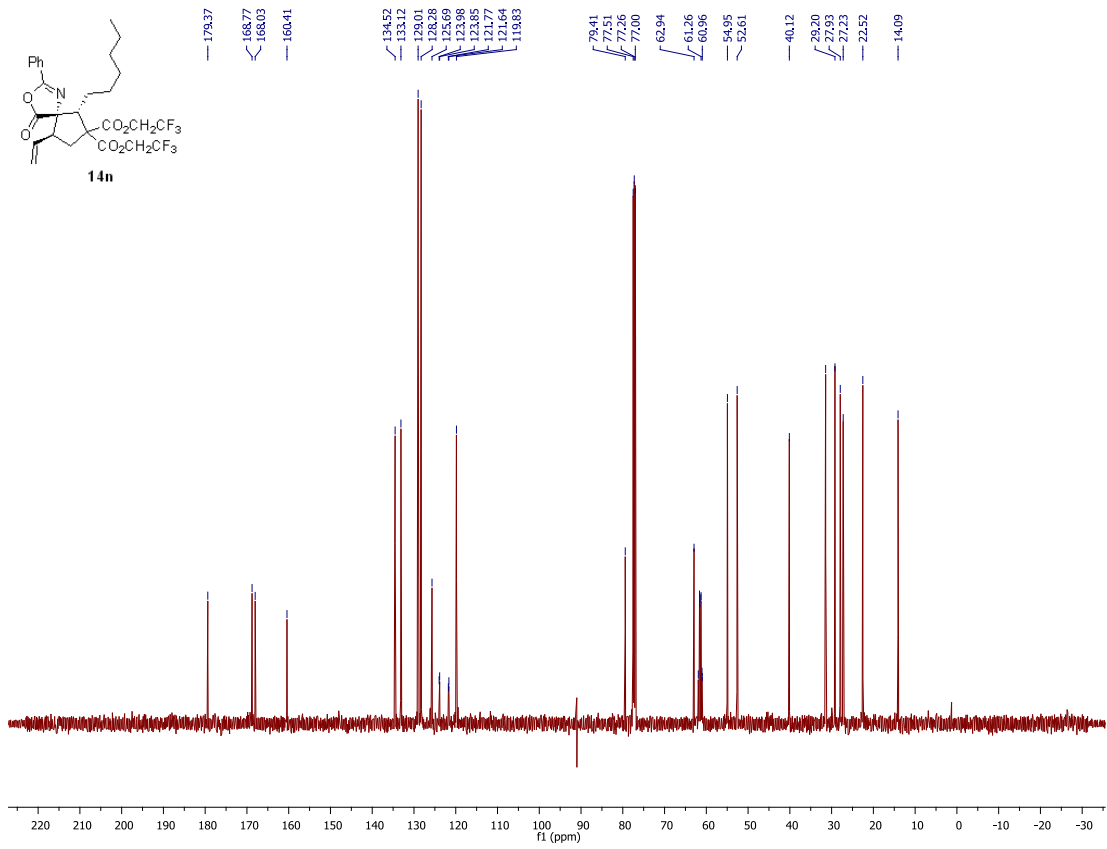

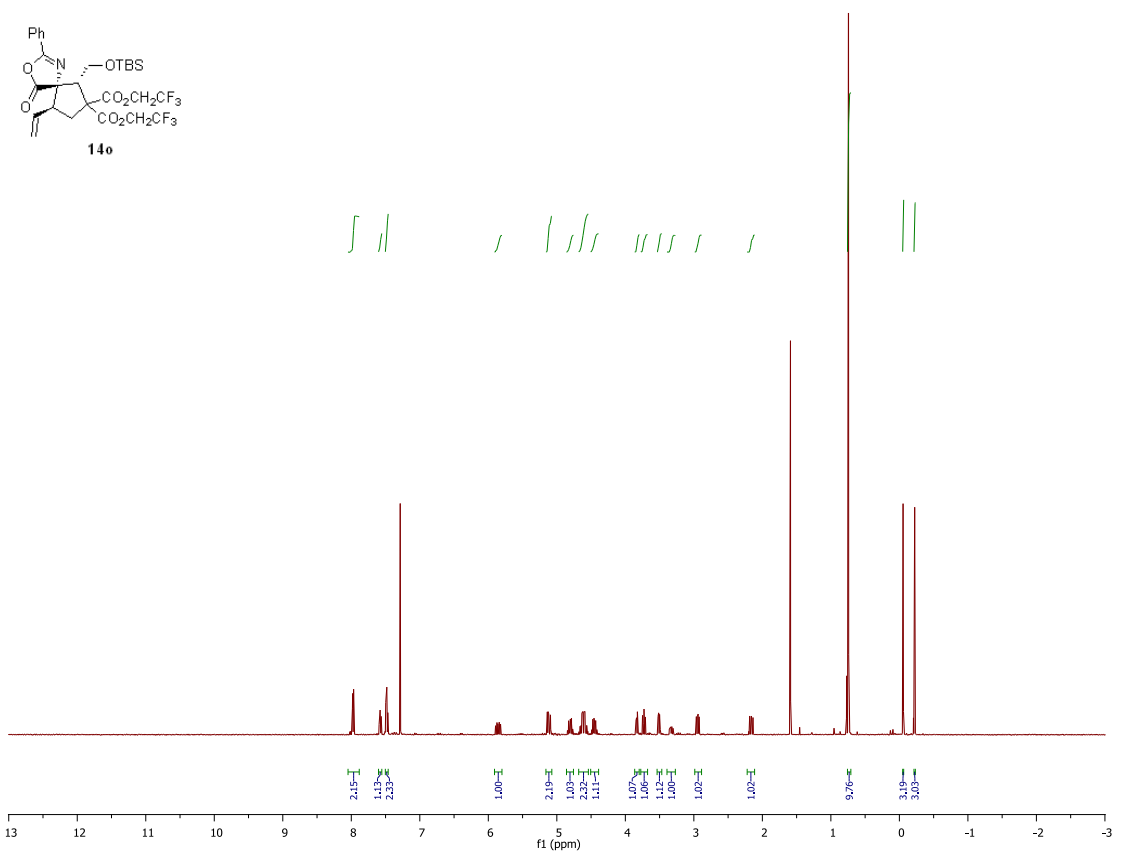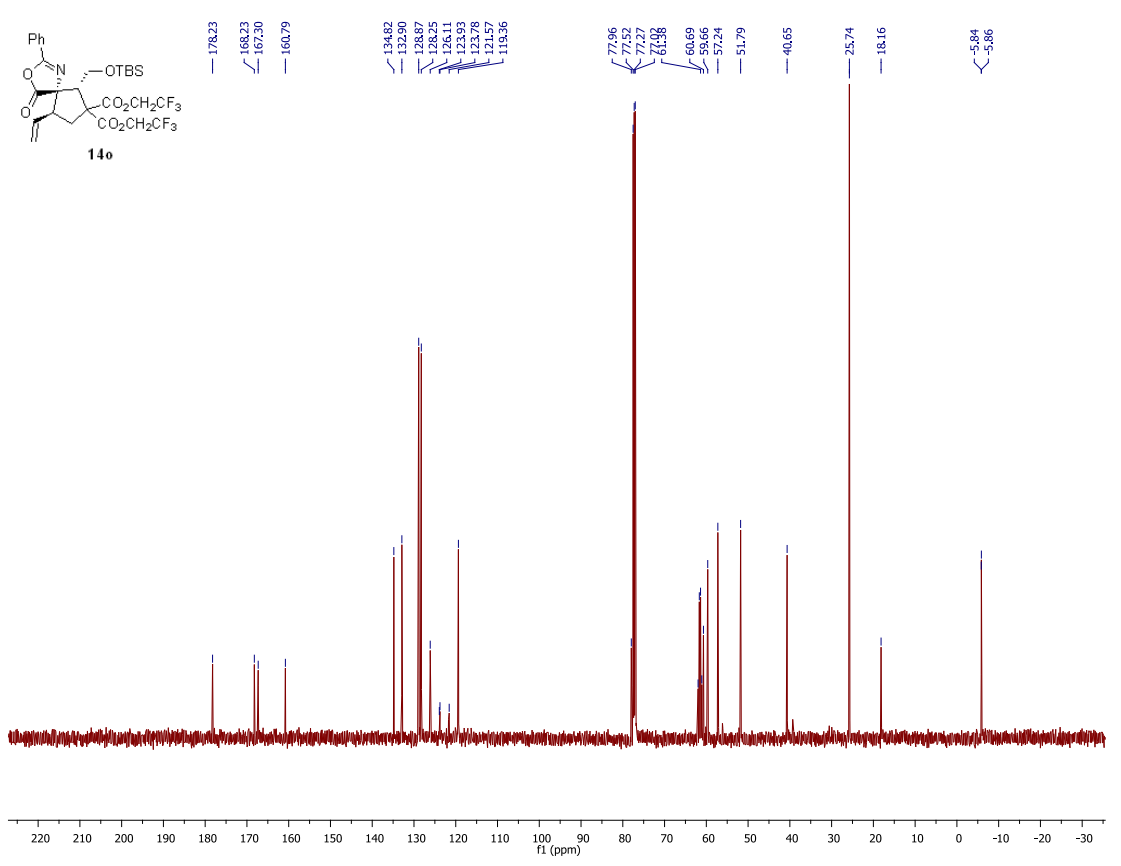

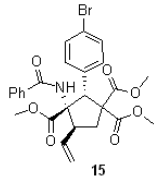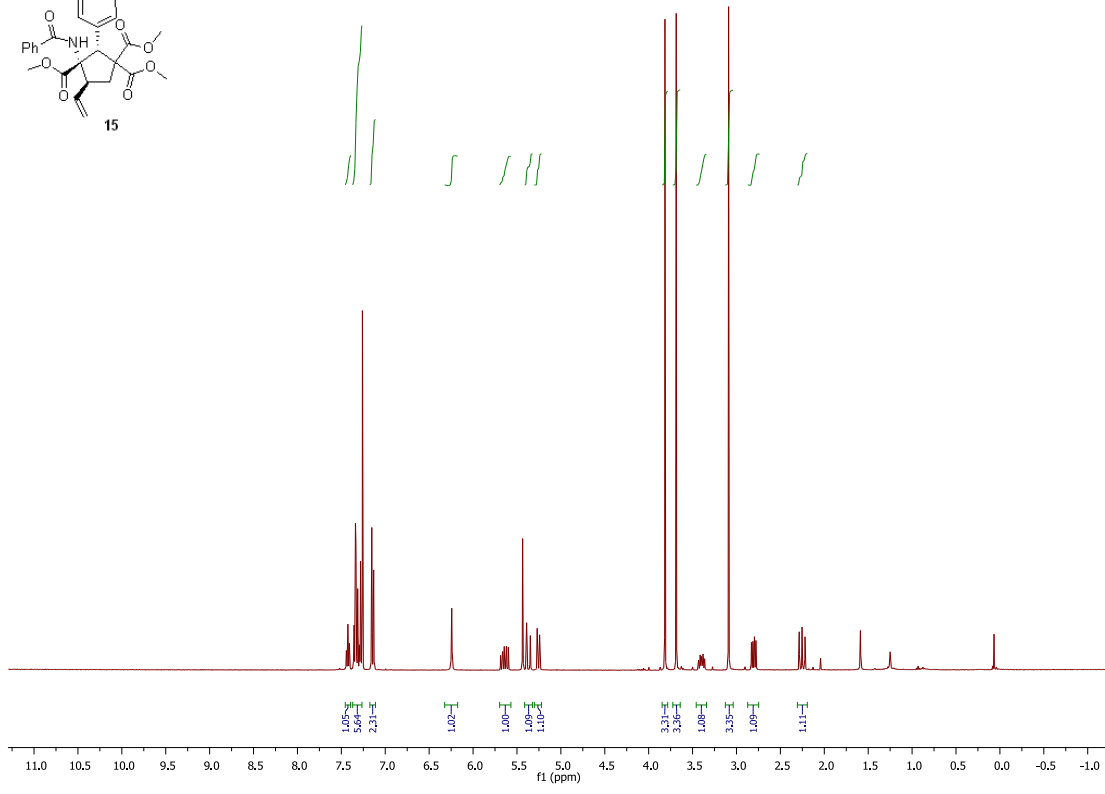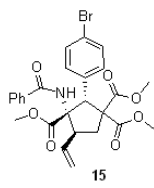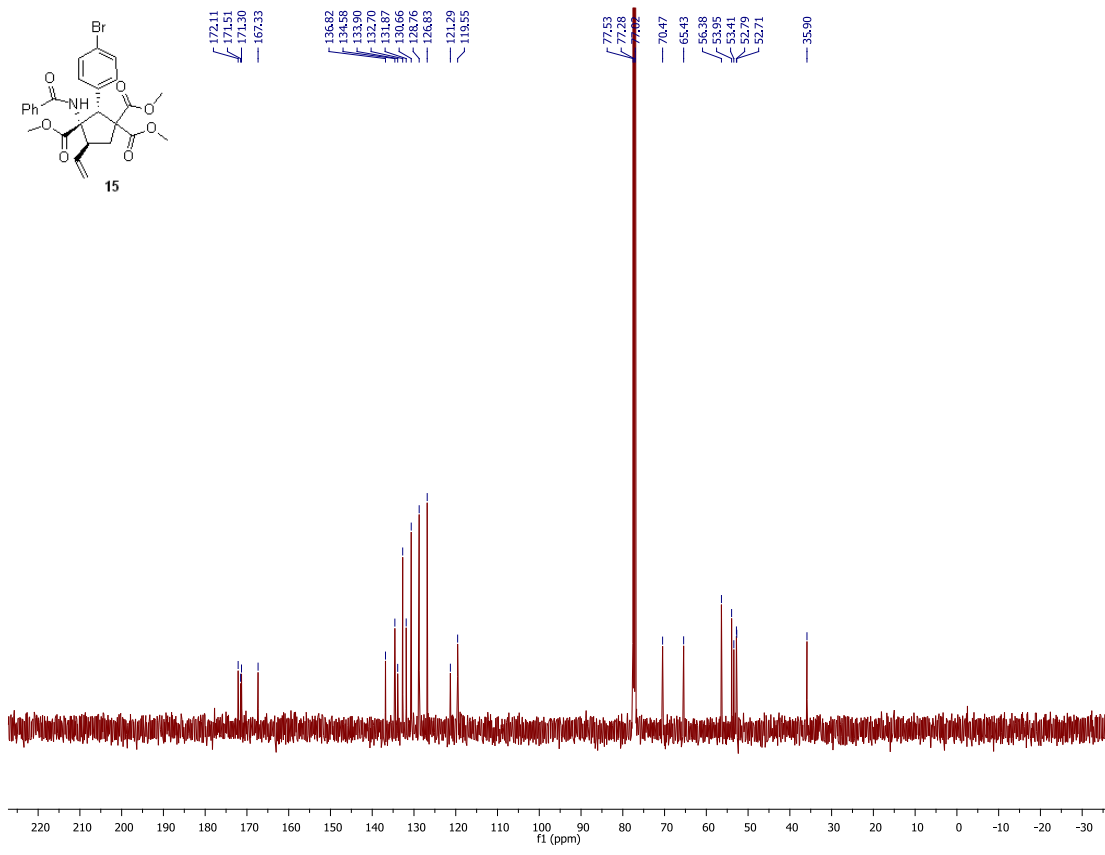

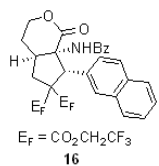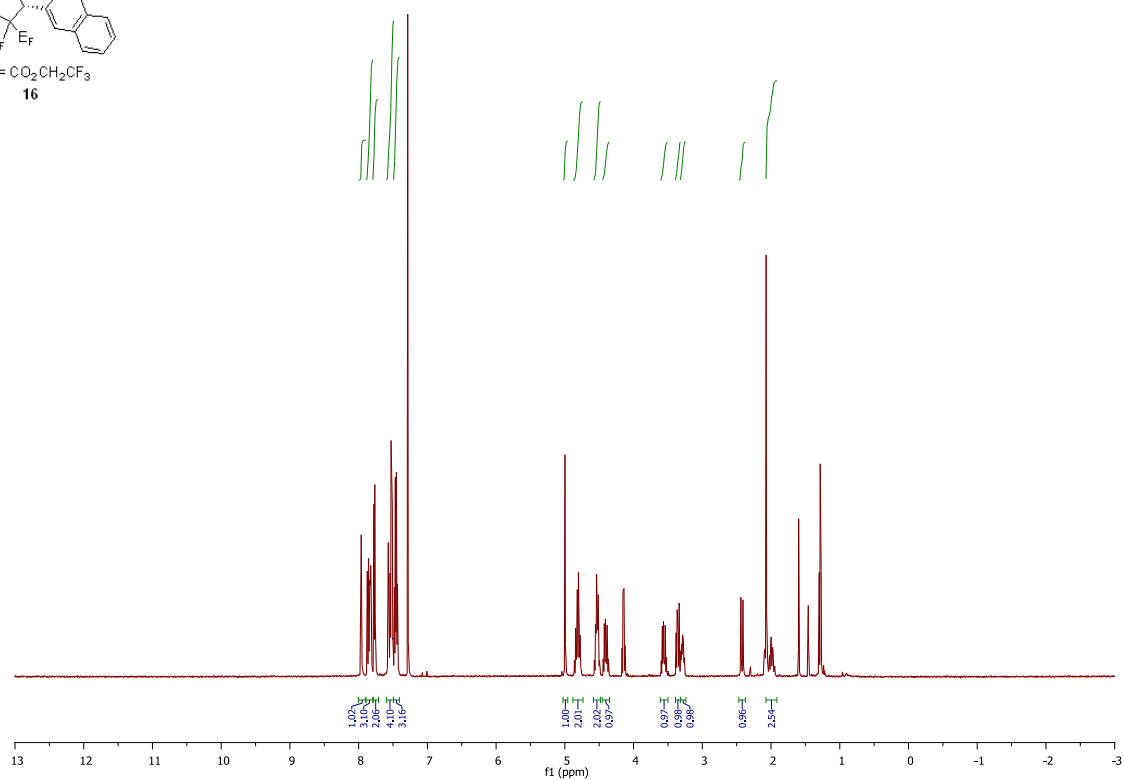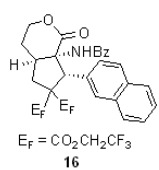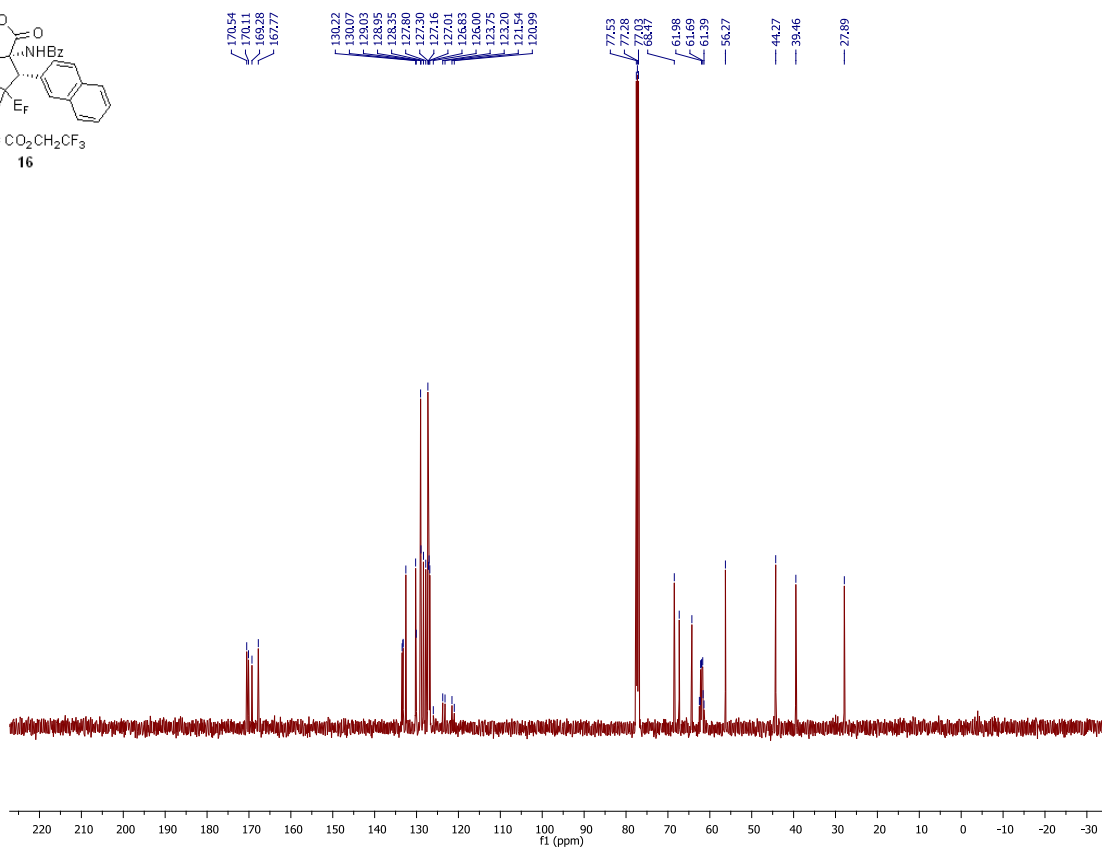

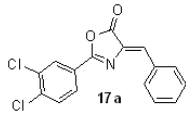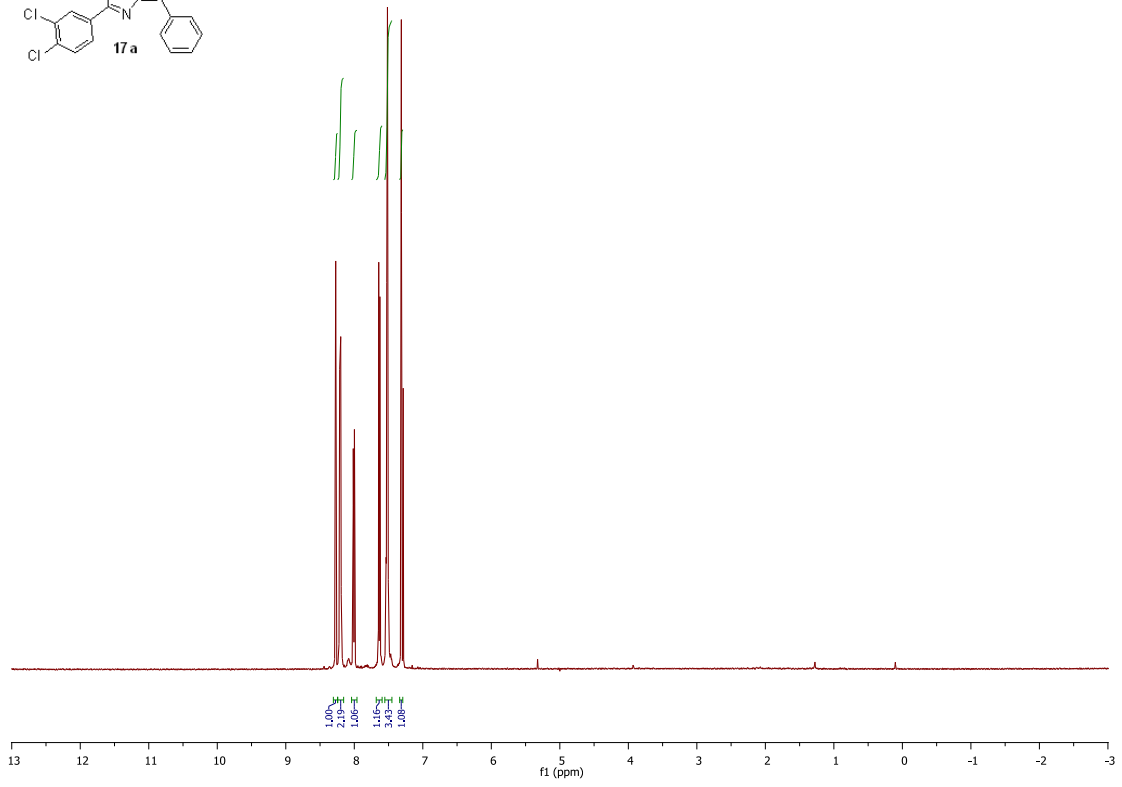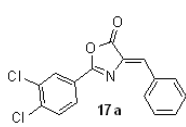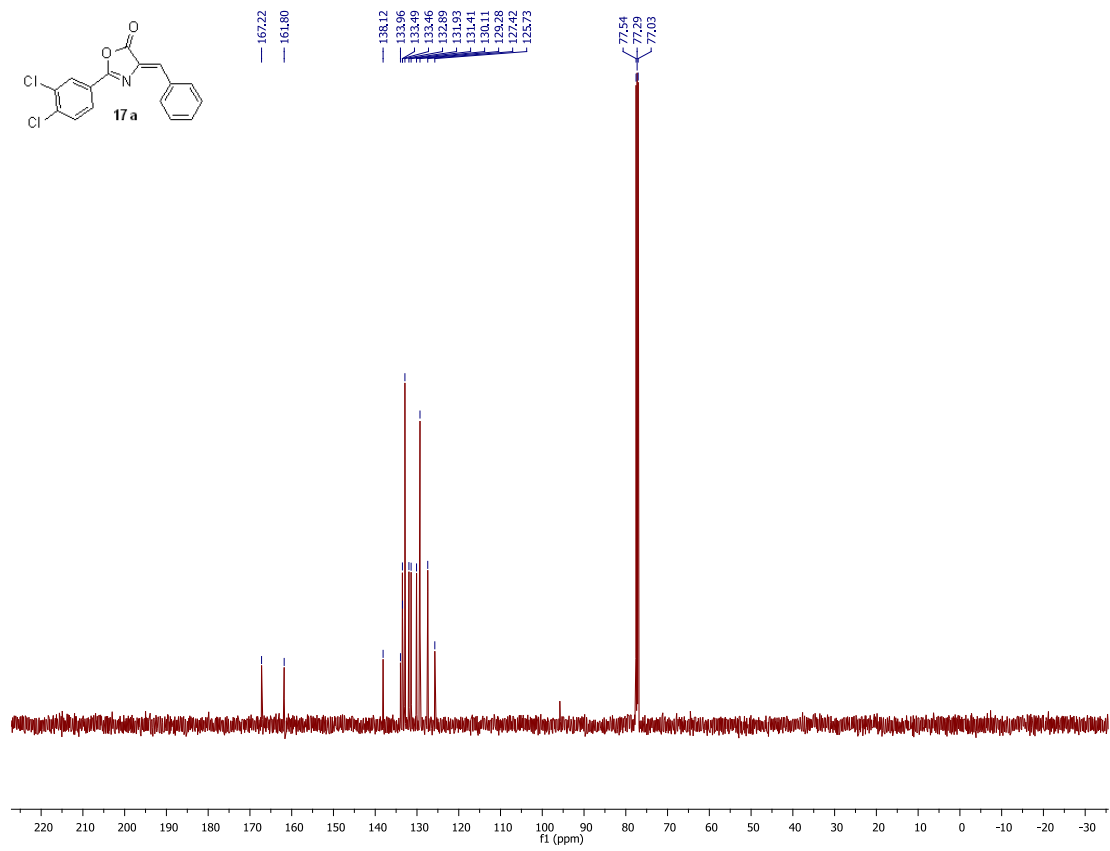

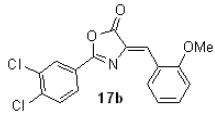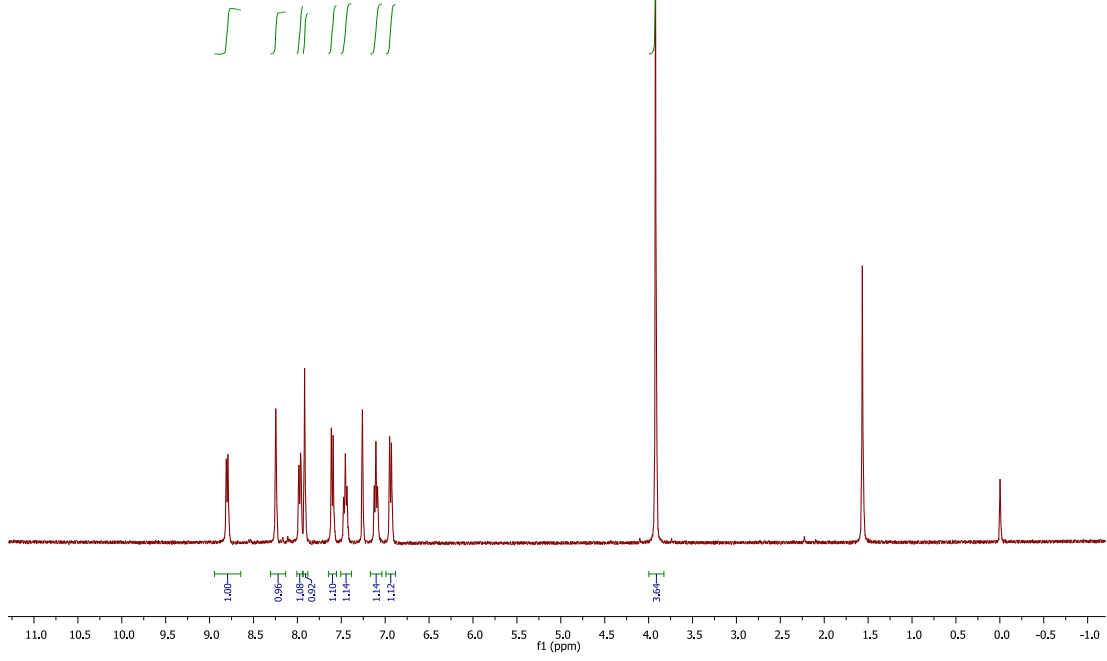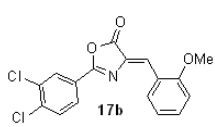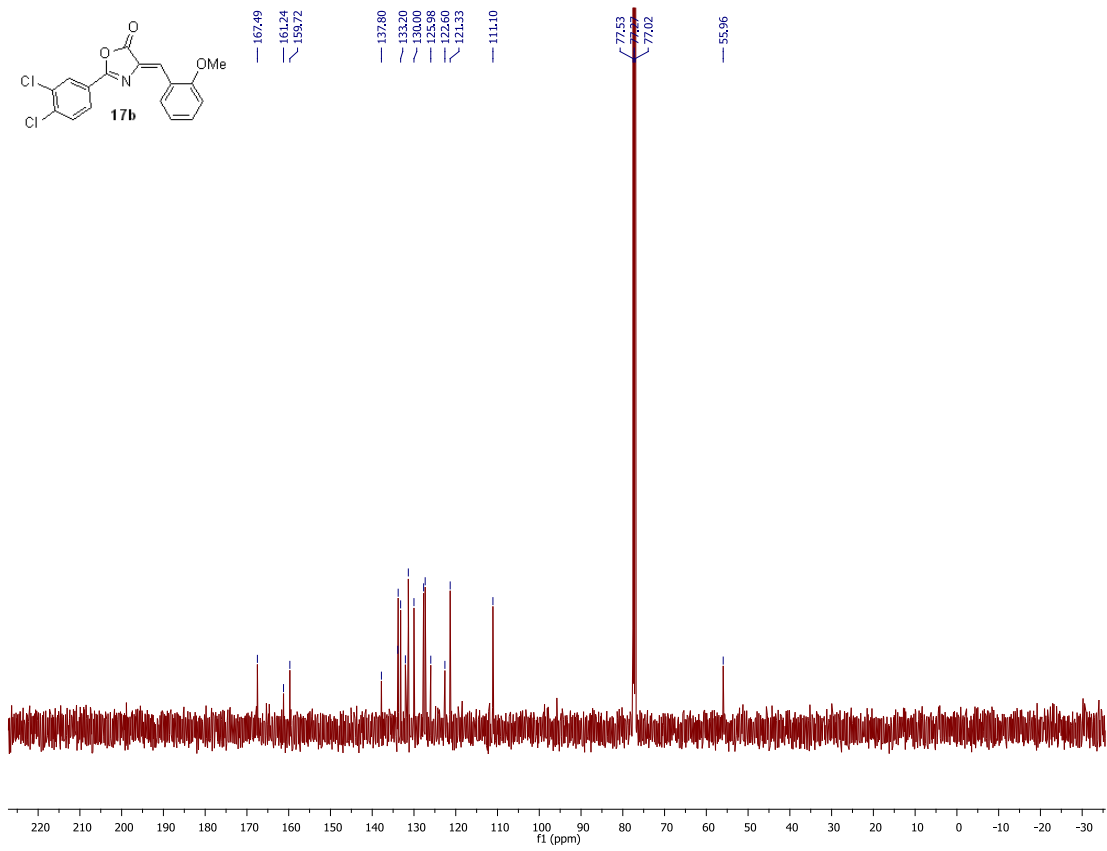

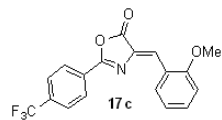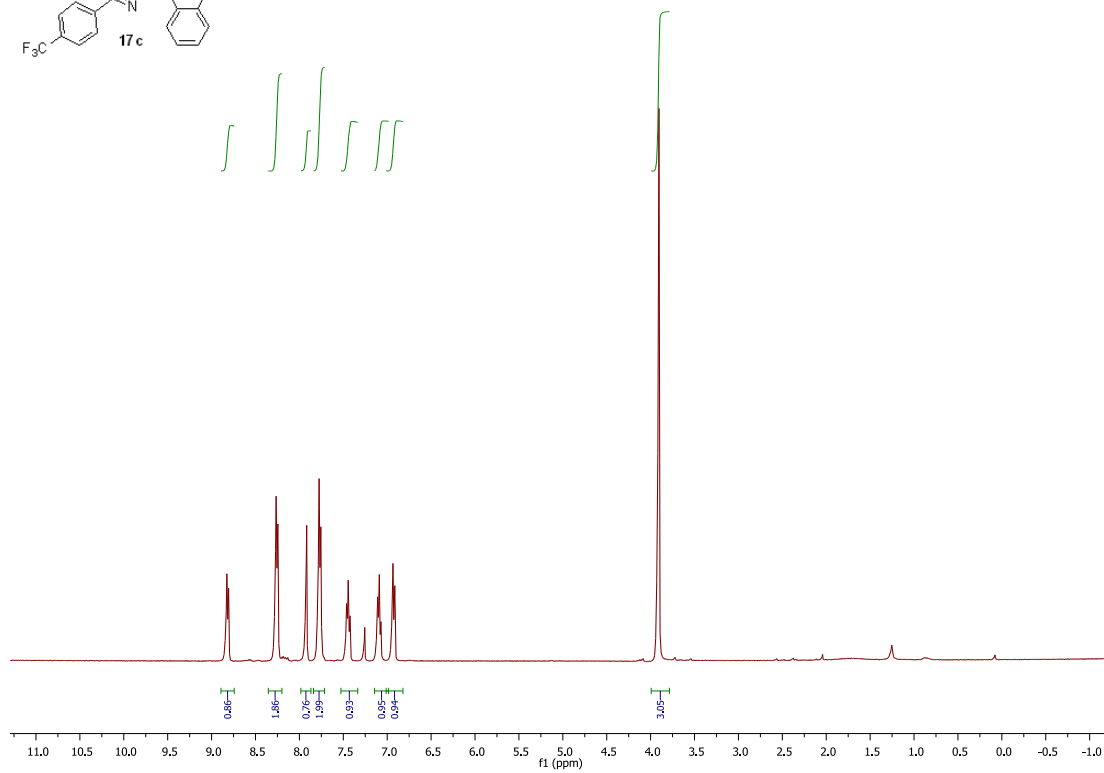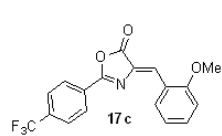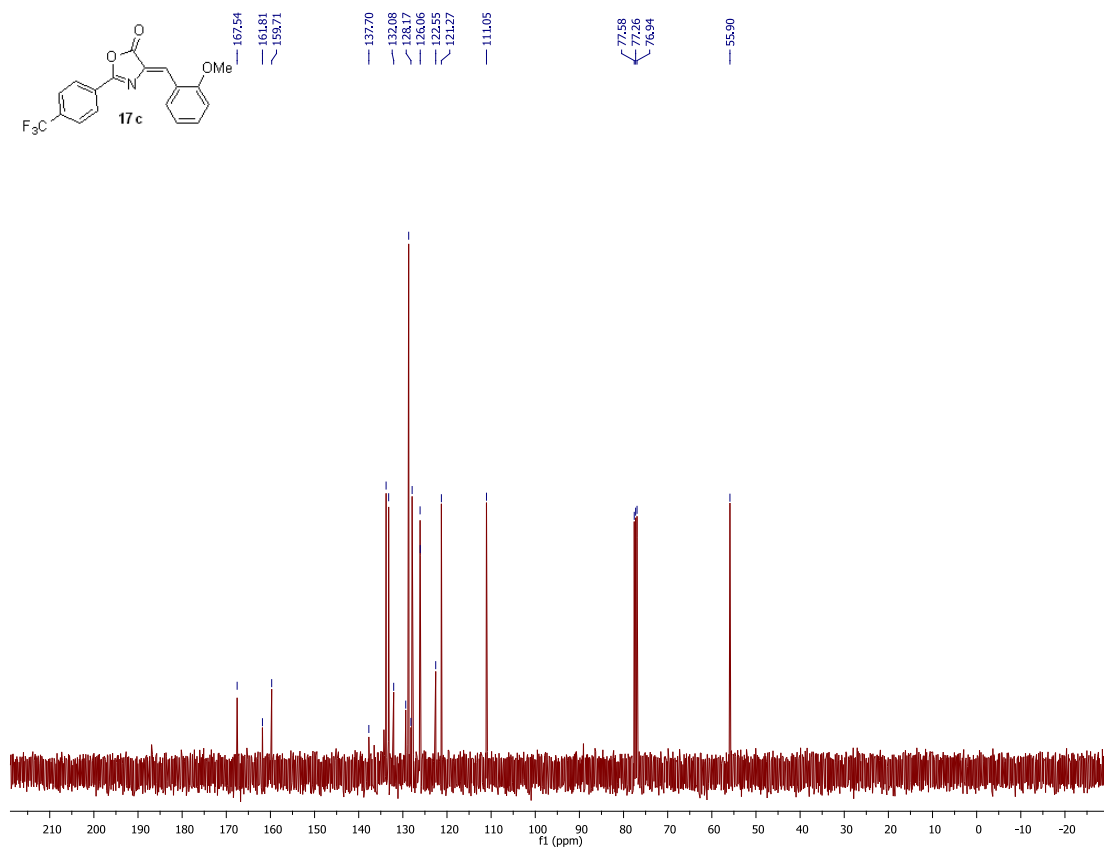

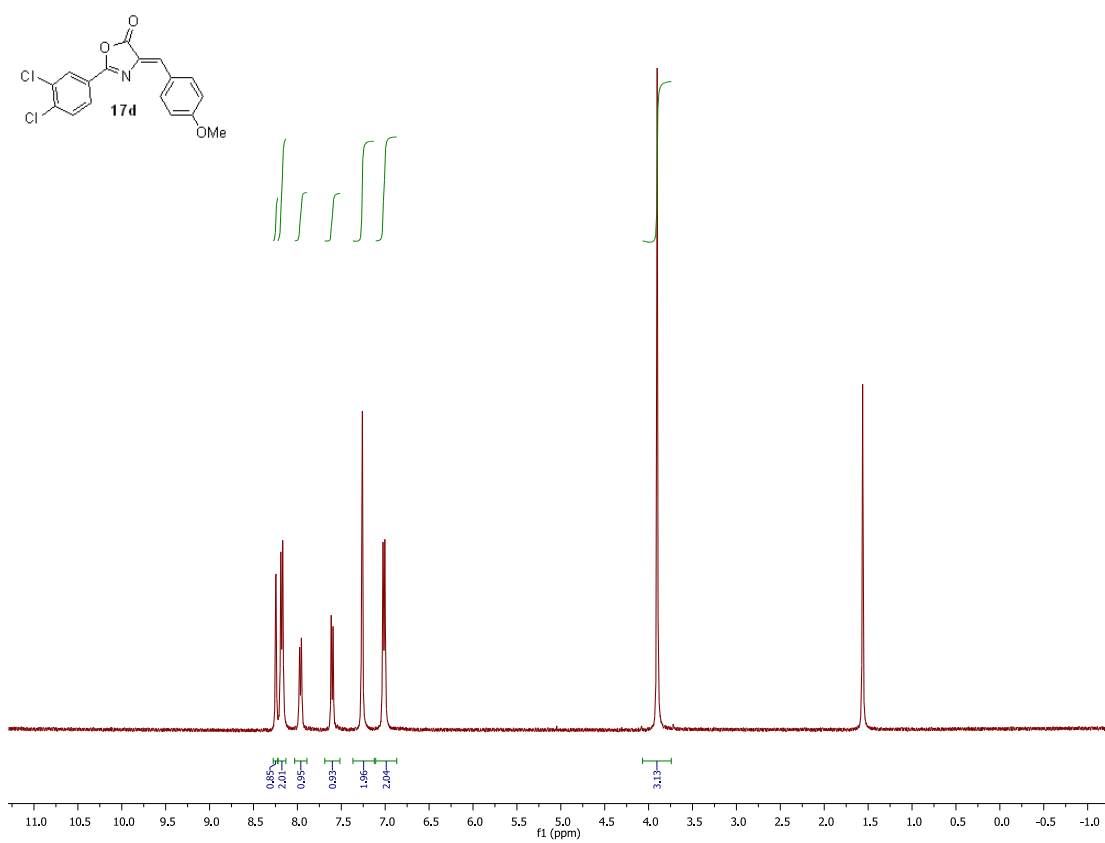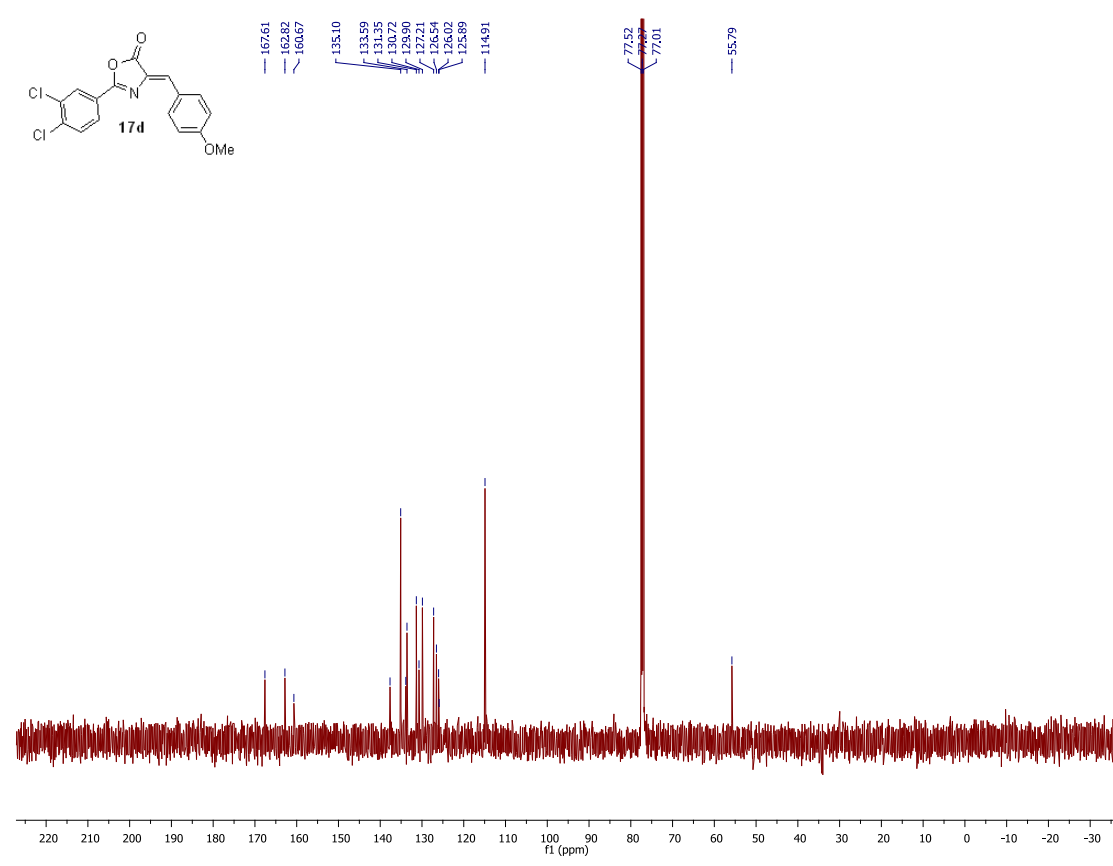



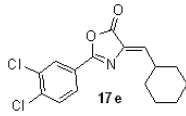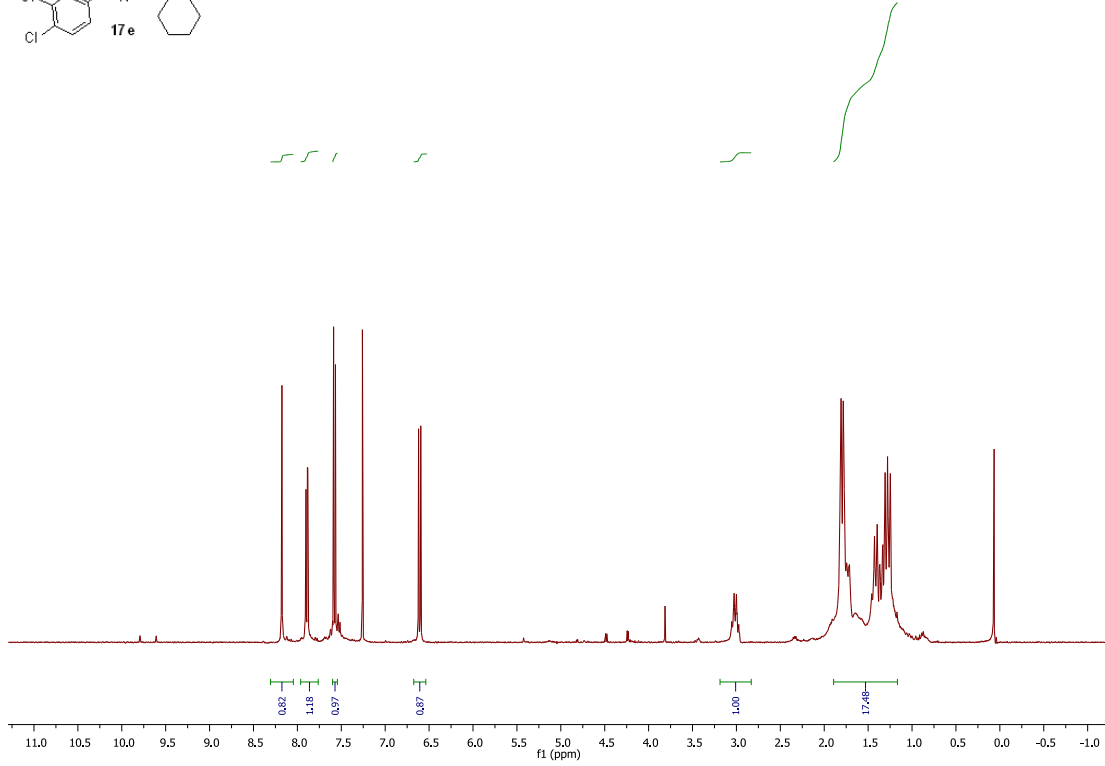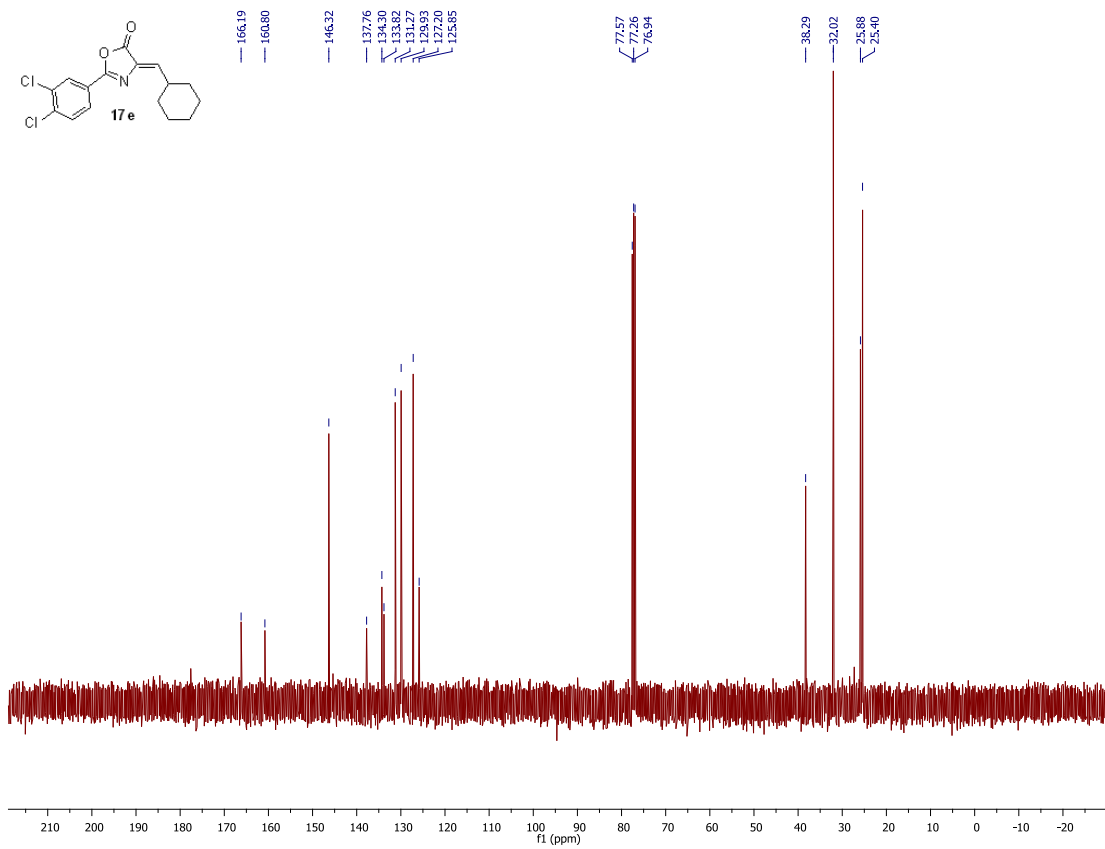

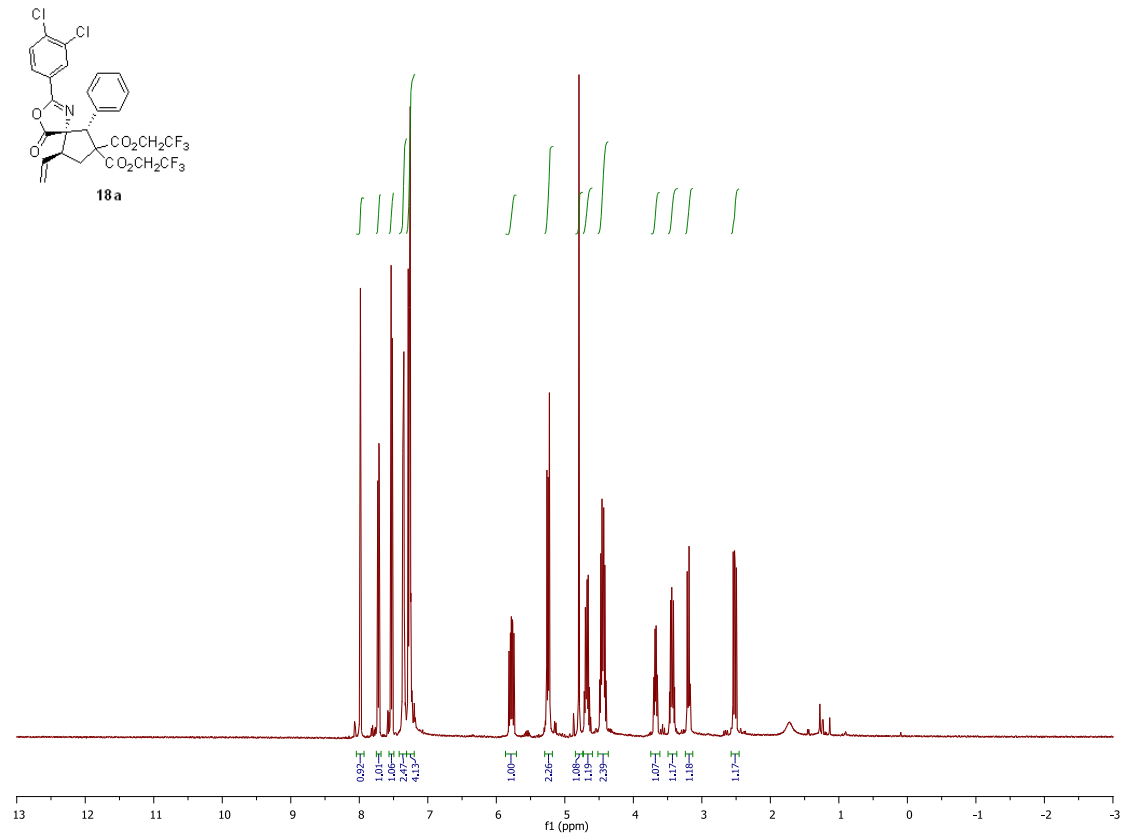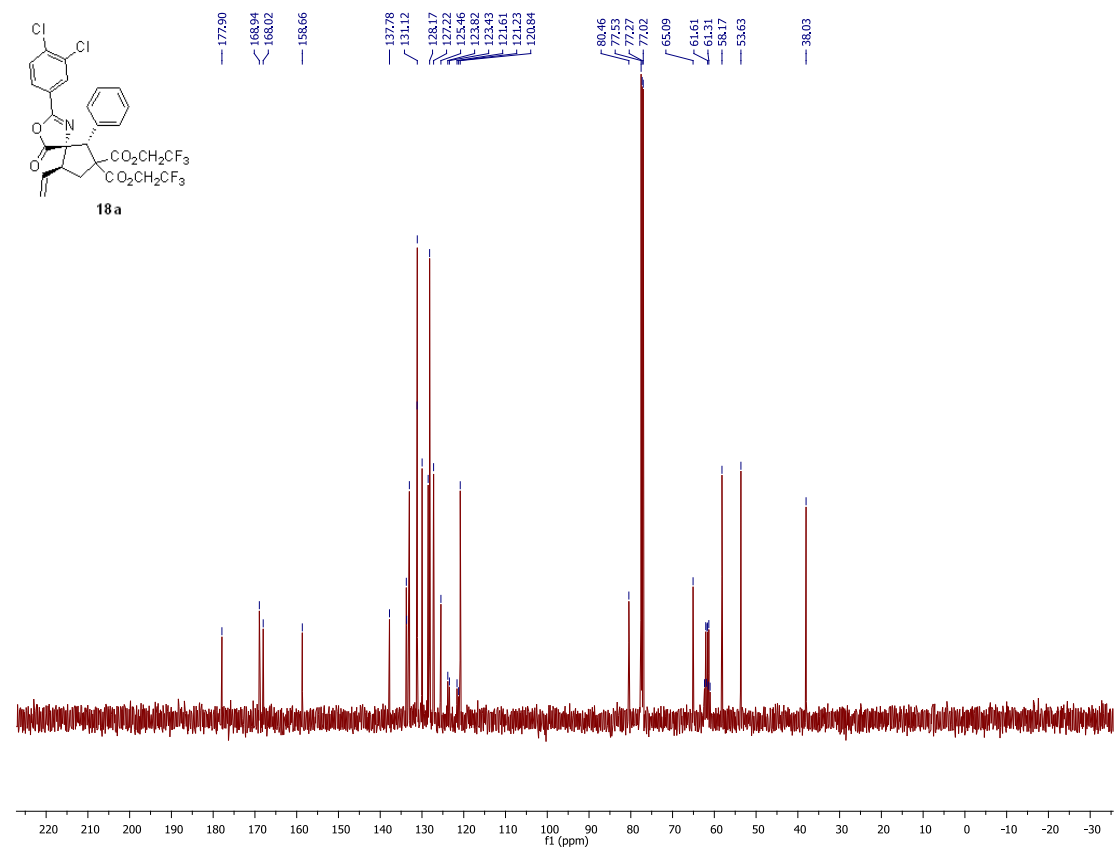

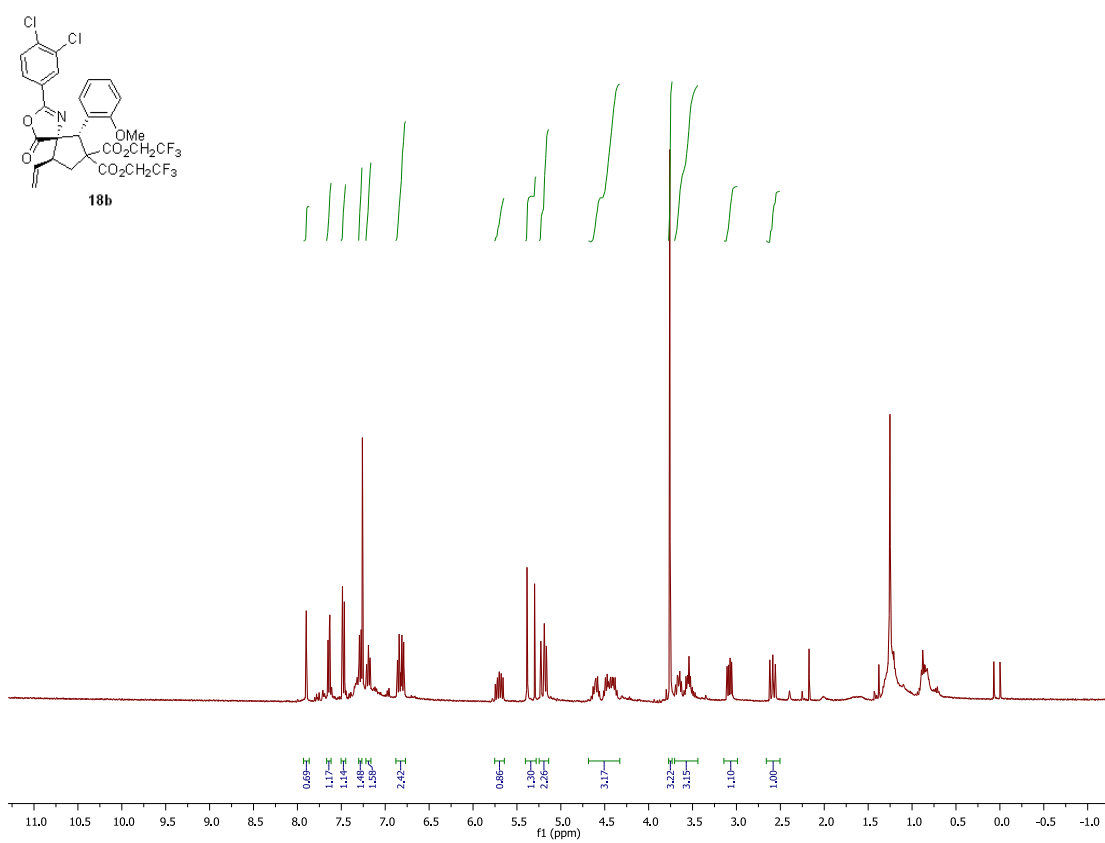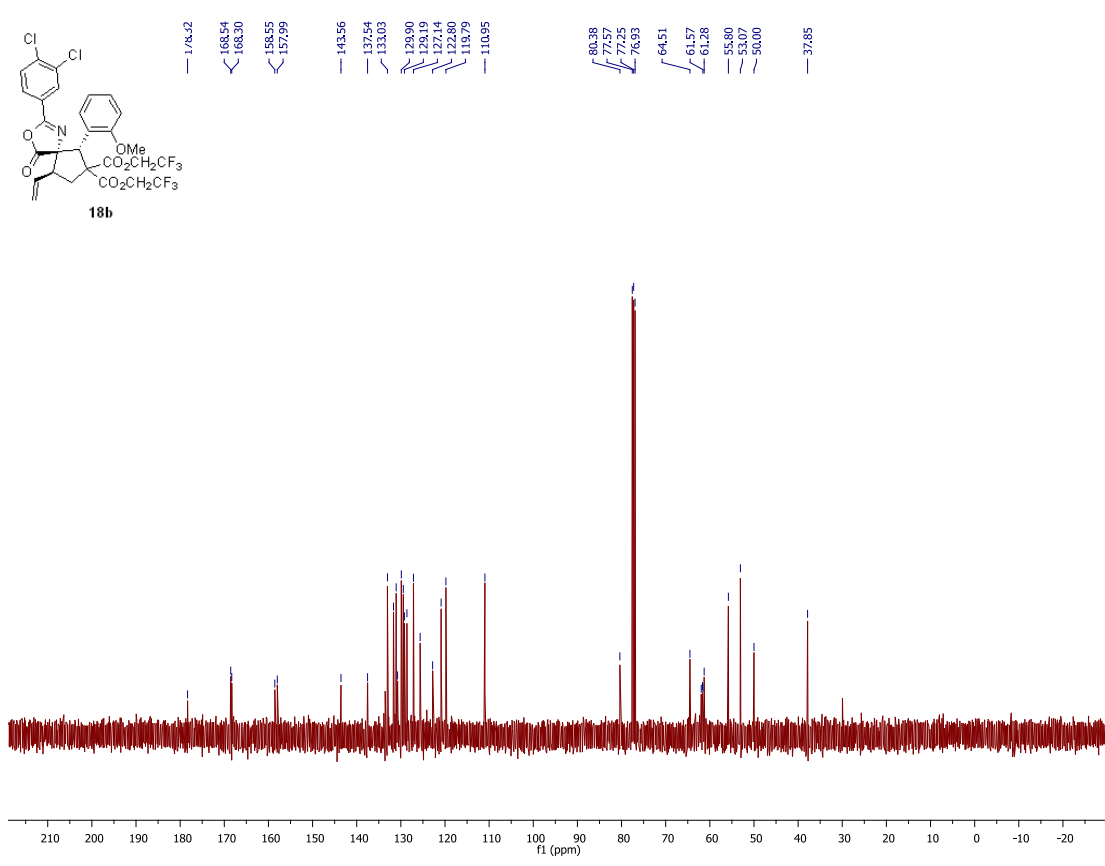

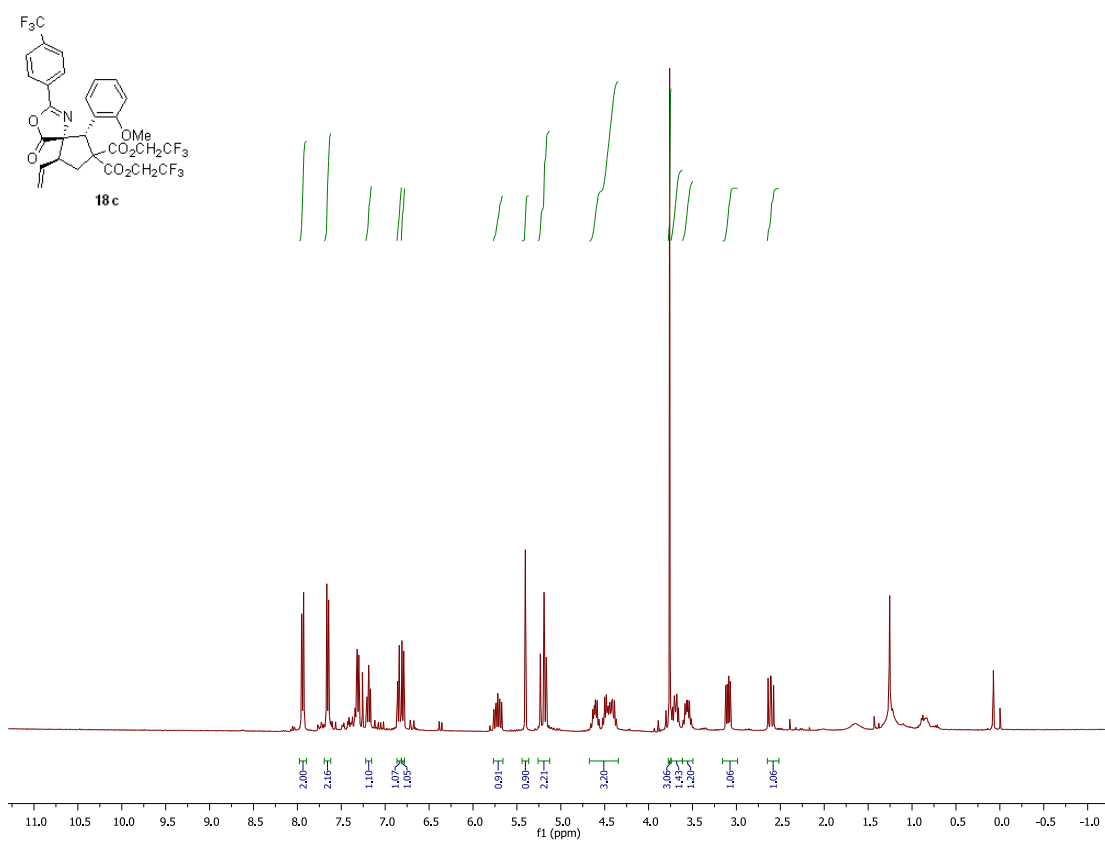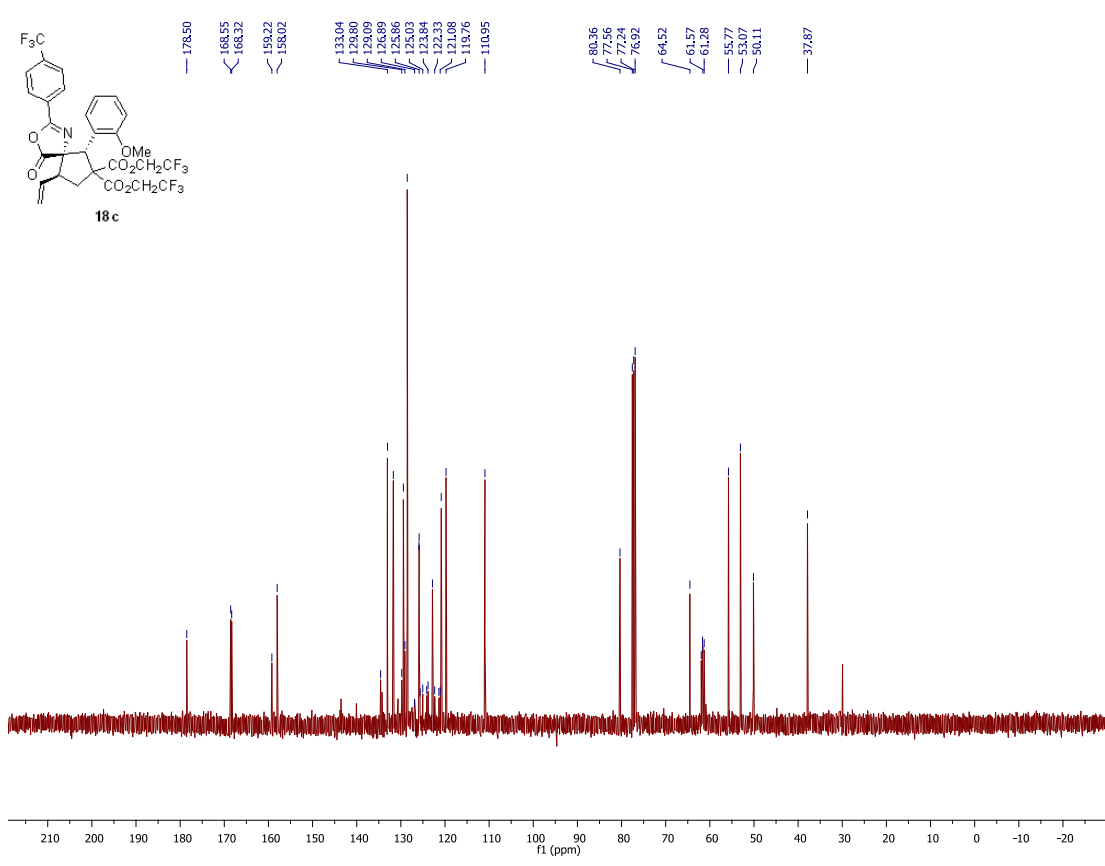

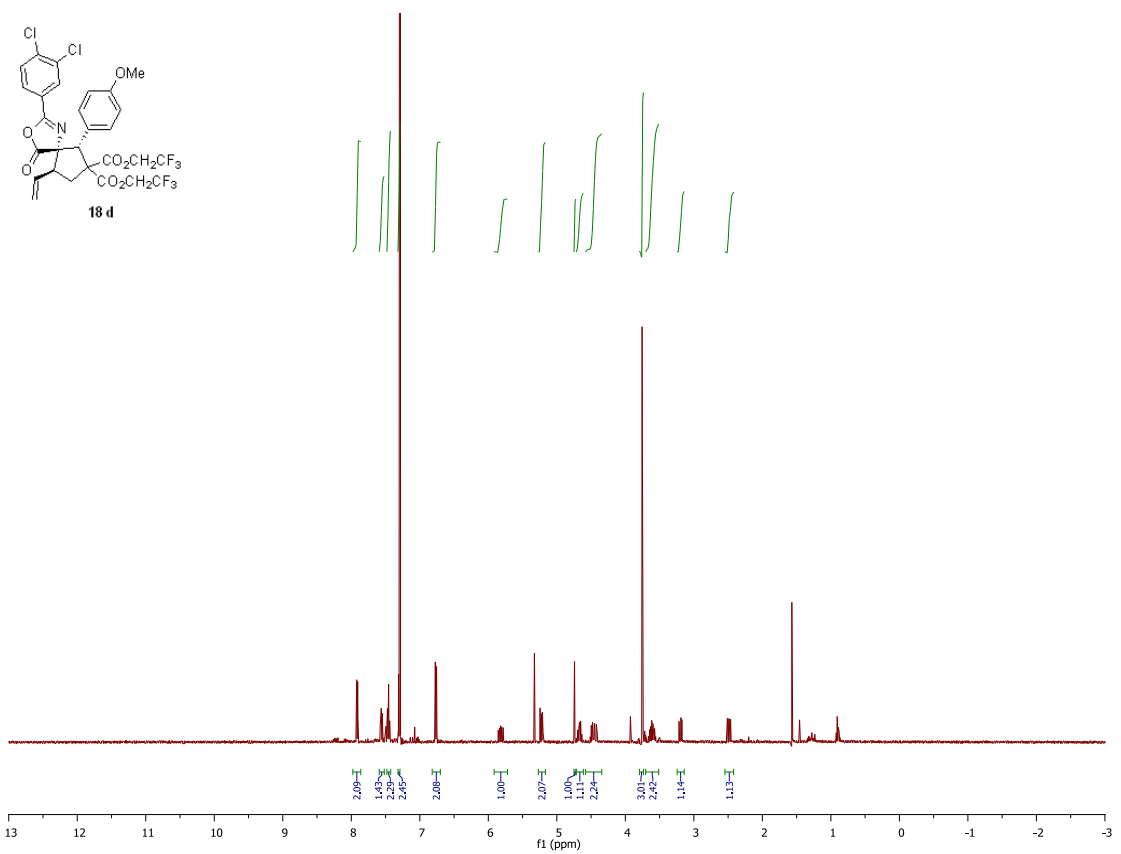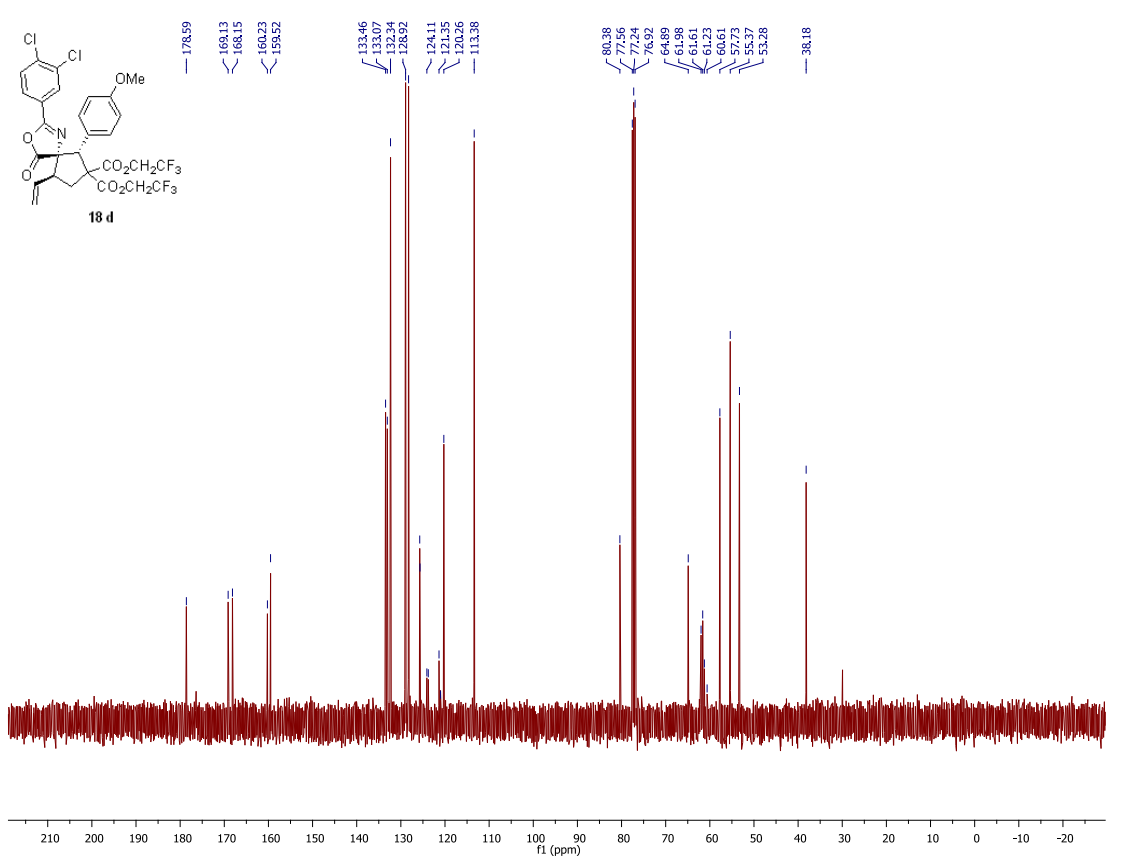

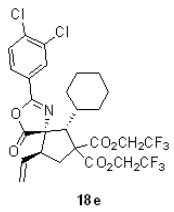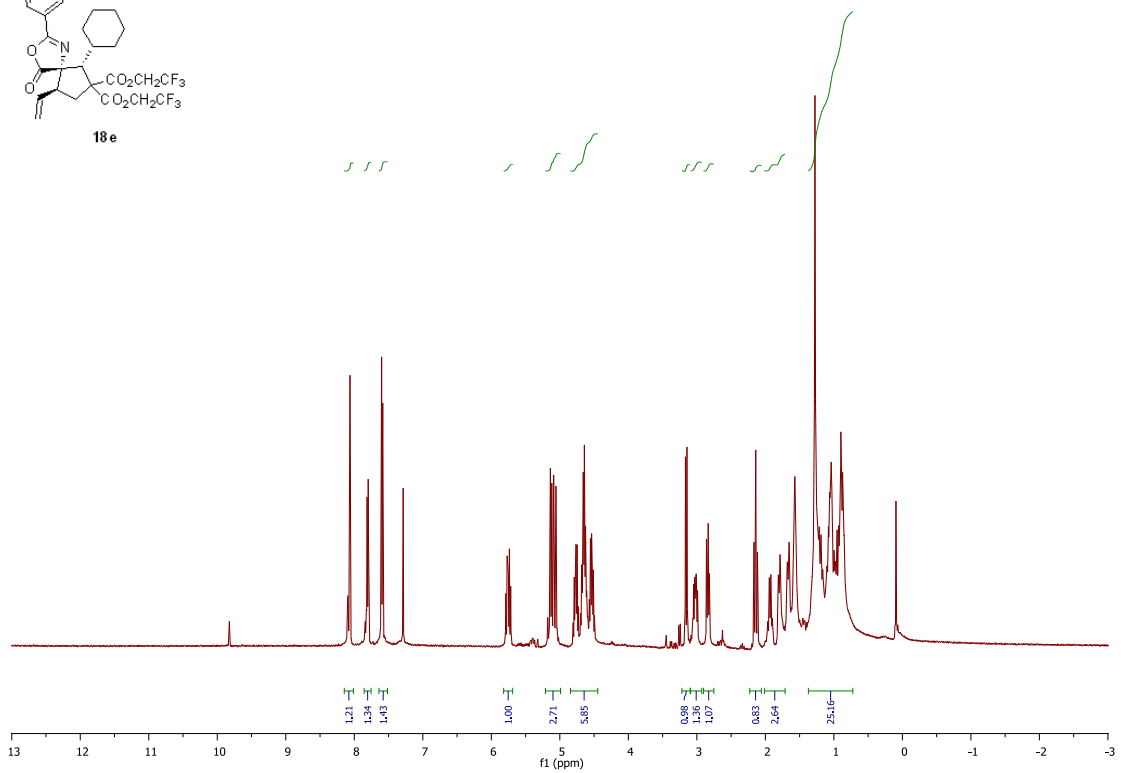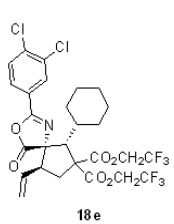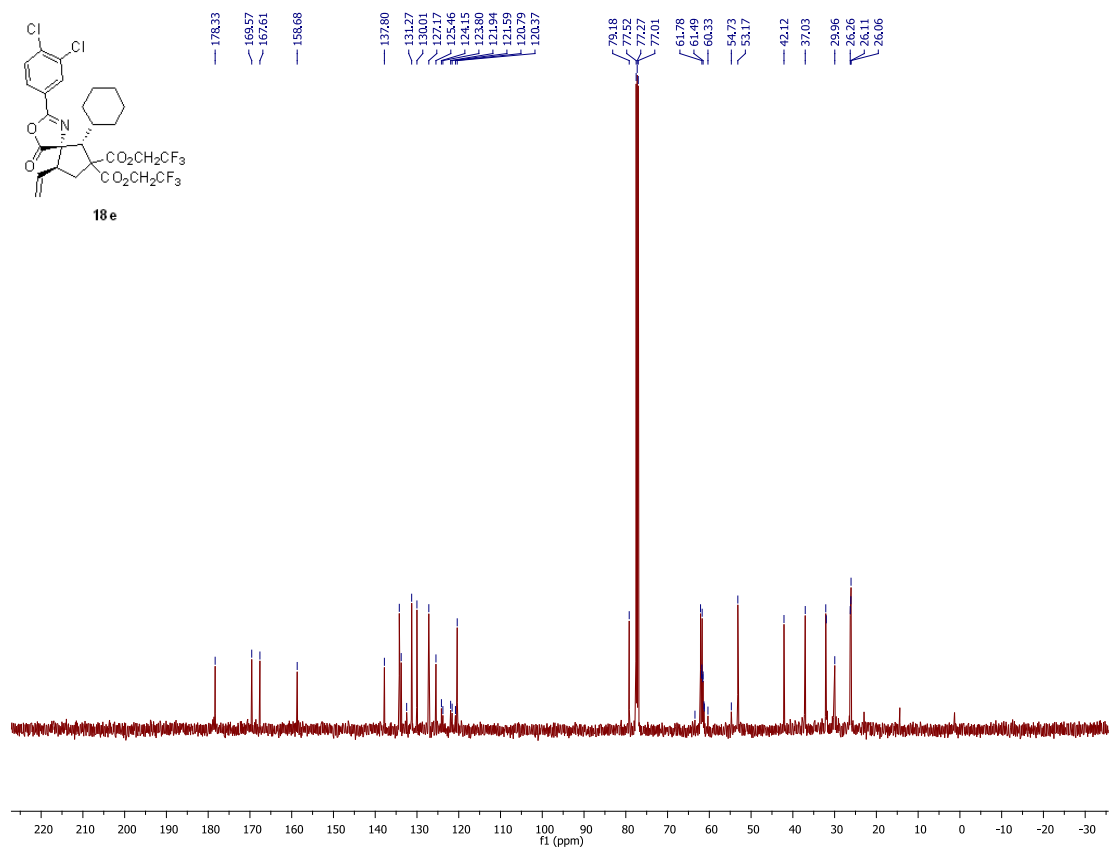

Supplement: NIHMS414185-supplement-2_si_002.pdf [file NIHMS414185-supplement-2_si_002.pdf]
